# Supplementary material for: Solution-phase-peptide synthesis via the group-assisted purification (GAP) chemistry without using chromatography and recrystallization
Source: Royal Society of Chemistry journal article supplement (doi:10.1039/c3cc48509a), 2013-11-27

## Electronic Supplementary Information

Solution-phase-peptide synthesis *via* the Group-Assisted Purification (GAP) chemistry without using chromatography and recrystallization<sup>†</sup>

Jianbin Wu,<sup>a,b</sup> Guanghui An,<sup>a,b</sup> Siqu Lin,<sup>b</sup> Jianbo Xie,<sup>b</sup> Wei Zhou,<sup>a,b</sup> Hao Sun,<sup>a</sup> Yi Pan<sup>a</sup>  
& Guigen Li<sup>a,b,\*</sup>

<sup>a</sup>Institute of Chemistry & BioMedical Sciences, Nanjing University, Nanjing 210093, P. R. China;

<sup>b</sup>Department of Chemistry and Biochemistry, Texas Tech University, Lubbock, TX 79409-1061, USA.

*Corresponding should be addressed to G.L. (guigenli@nju.edu.cn; guigen.li@ttu.edu).*

<sup>1</sup>H NMR, <sup>13</sup>C NMR and <sup>31</sup>P NMR spectra of products **A2-A5**, **I-1a**, **I-2**, **I-2a-I-2j**, **I-3a** and **1**.  
Mass spectra of products **I-1a**, **I-2**, **I-2a-I-2j**, **I-3a** and **1**.

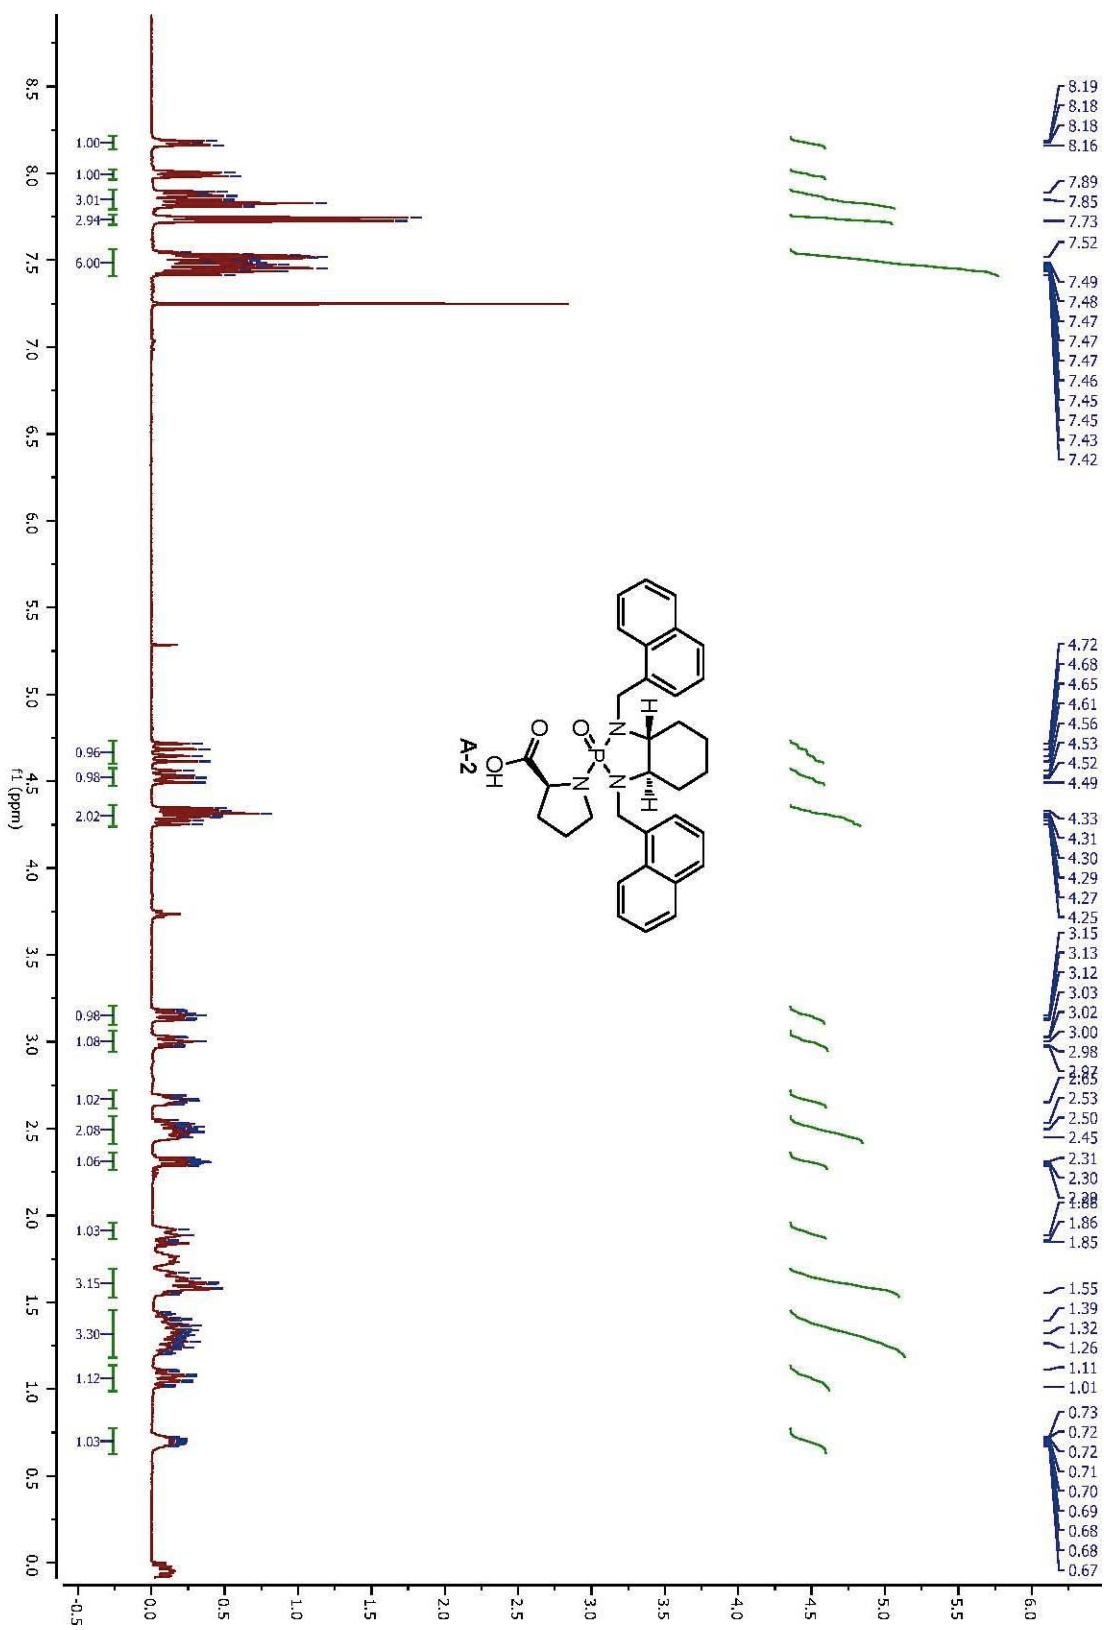

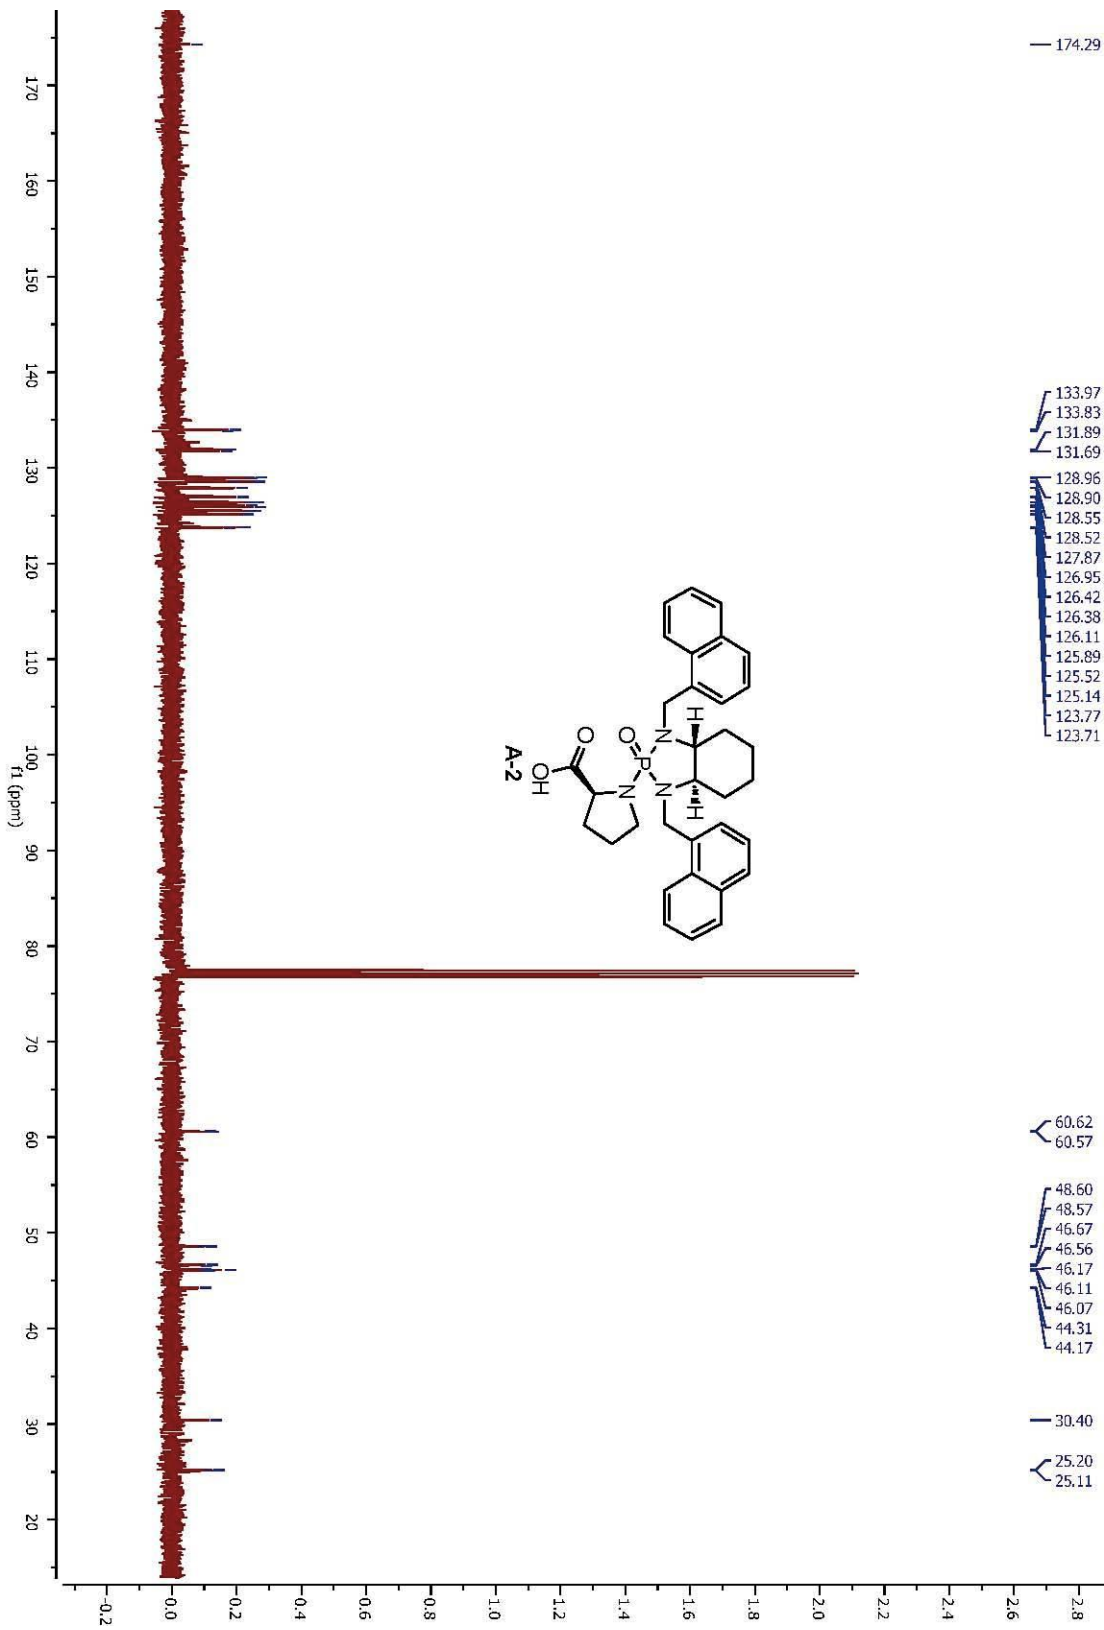

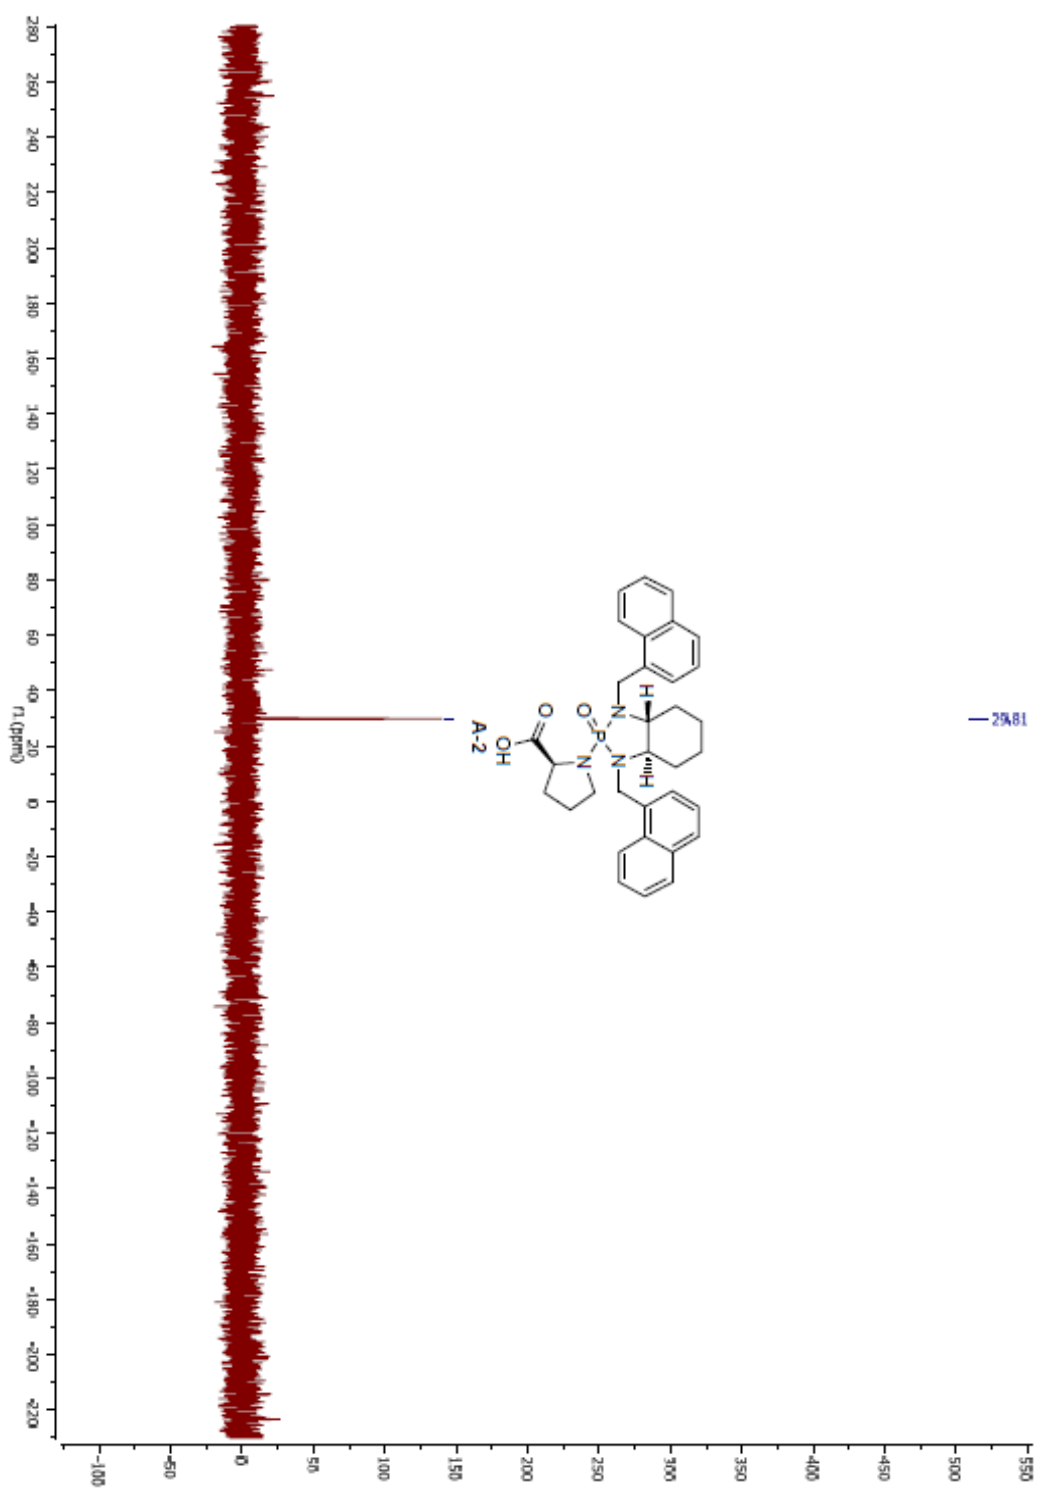



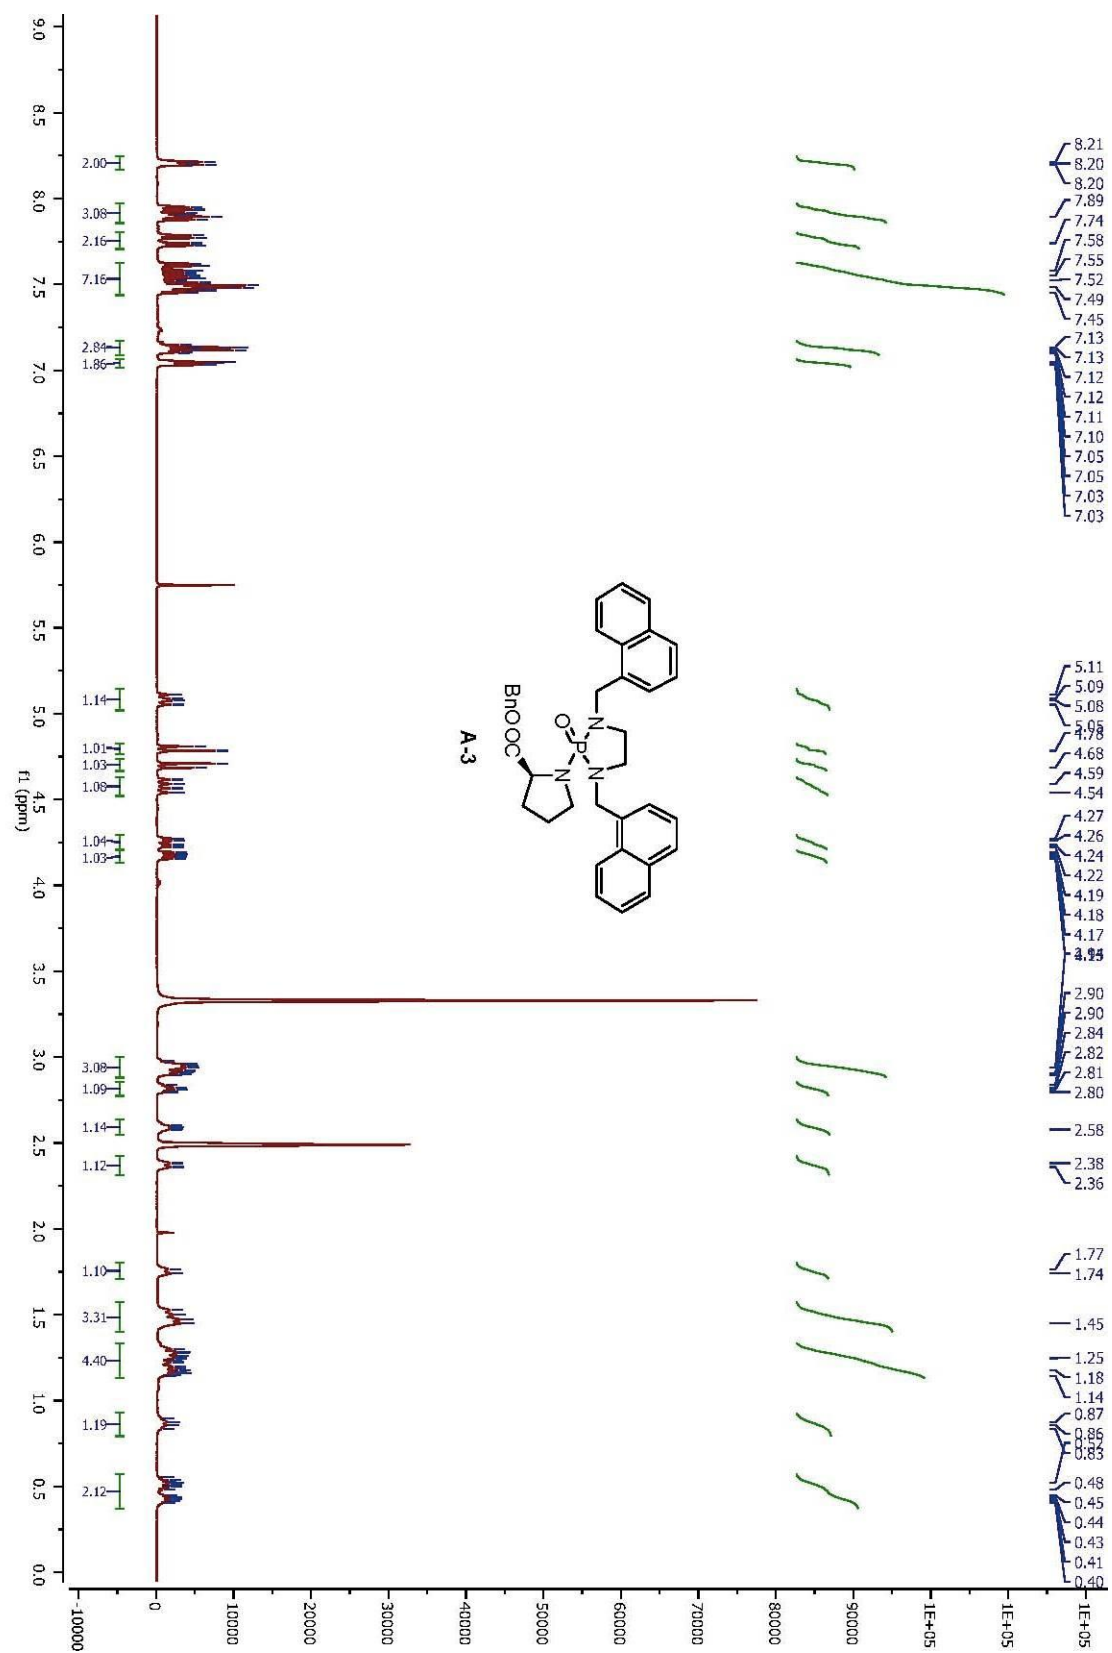

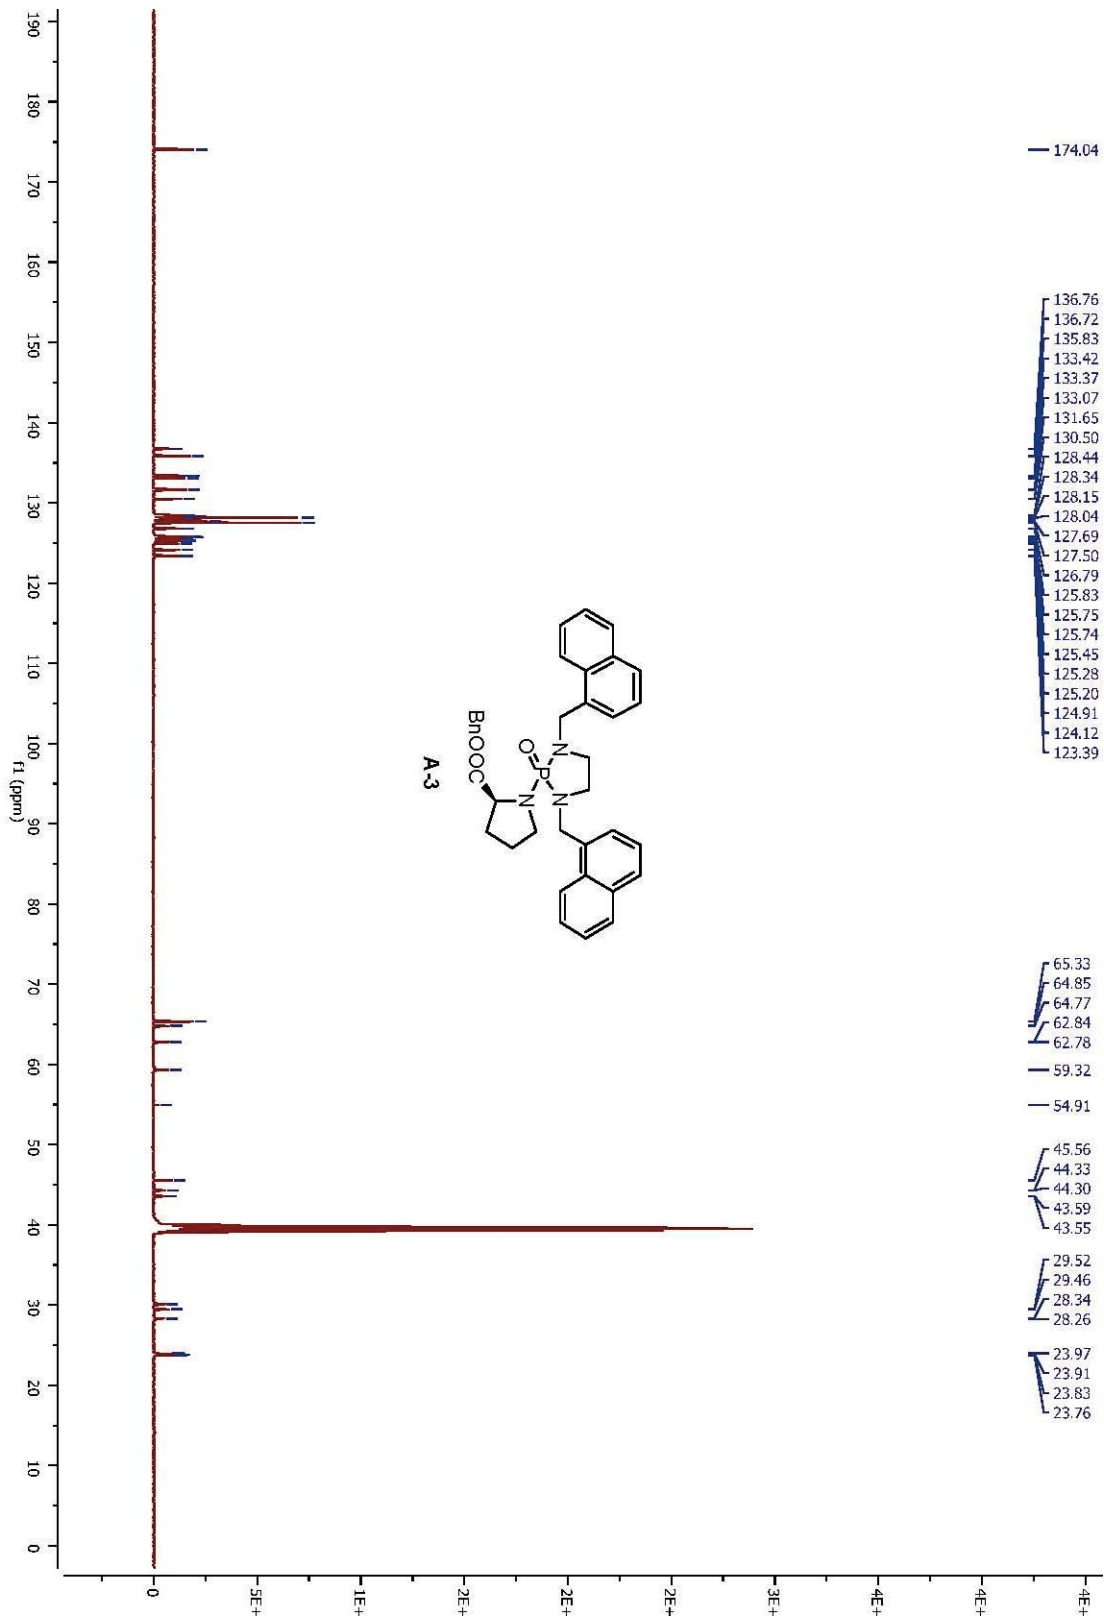

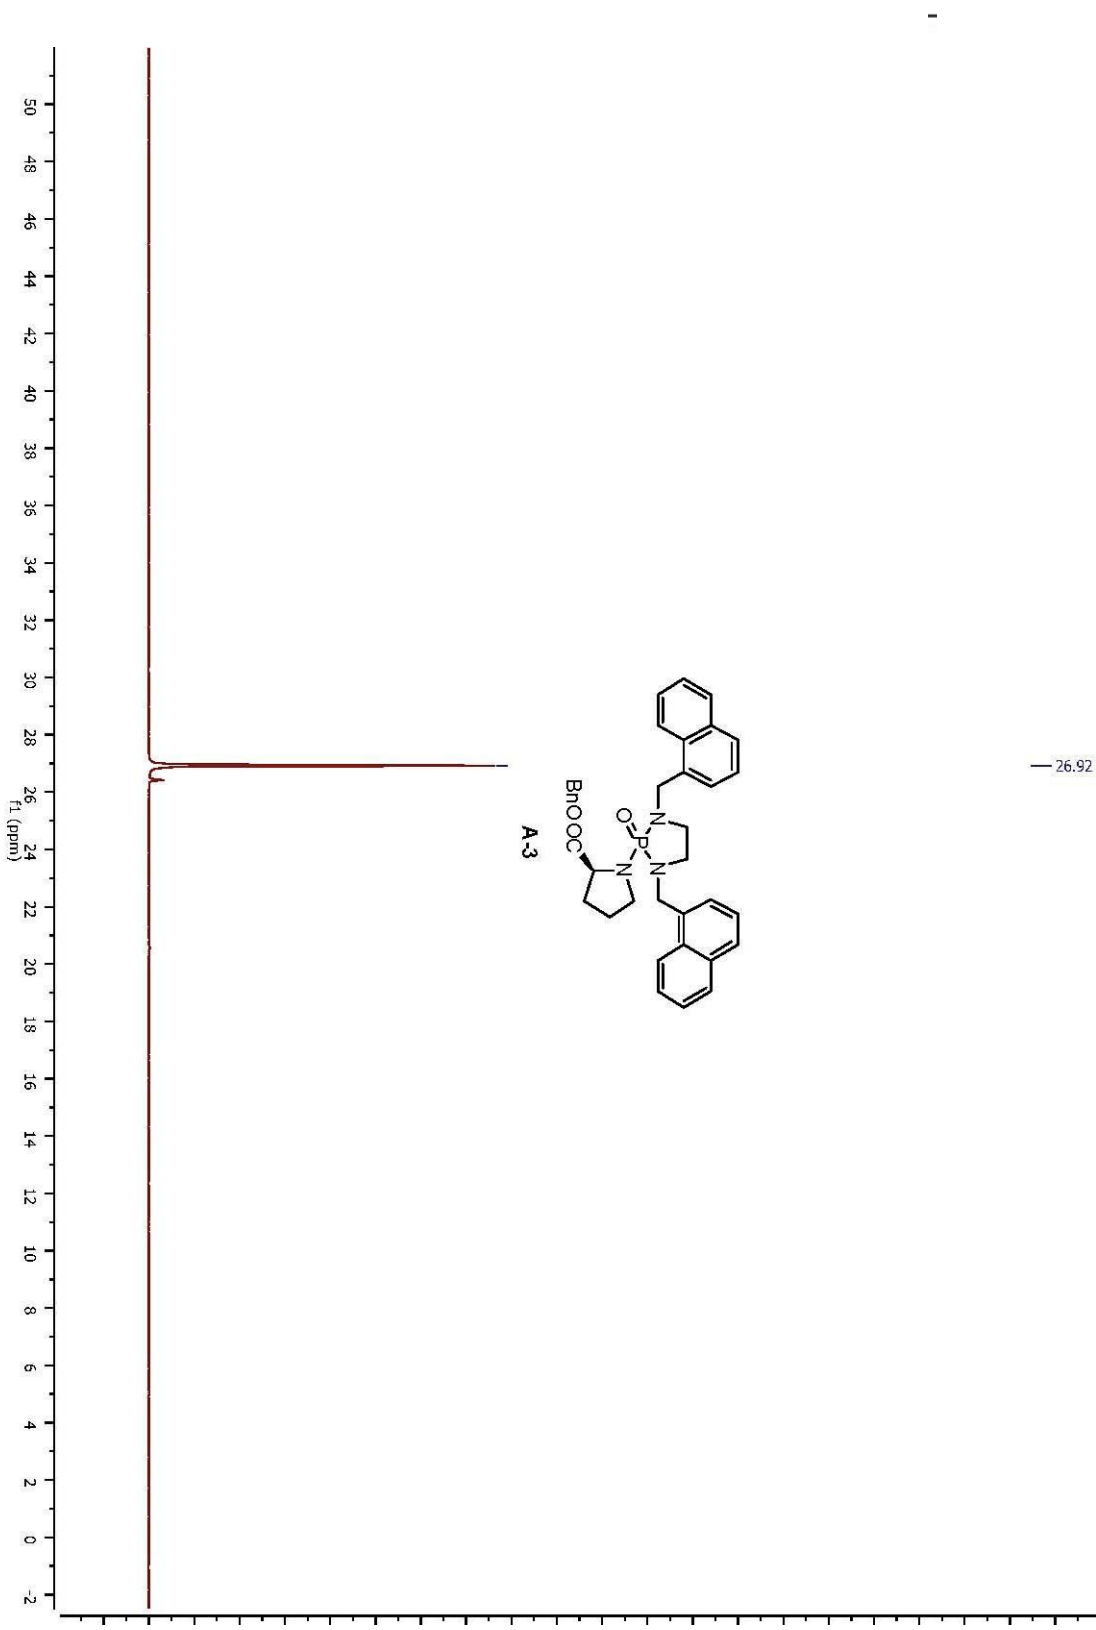

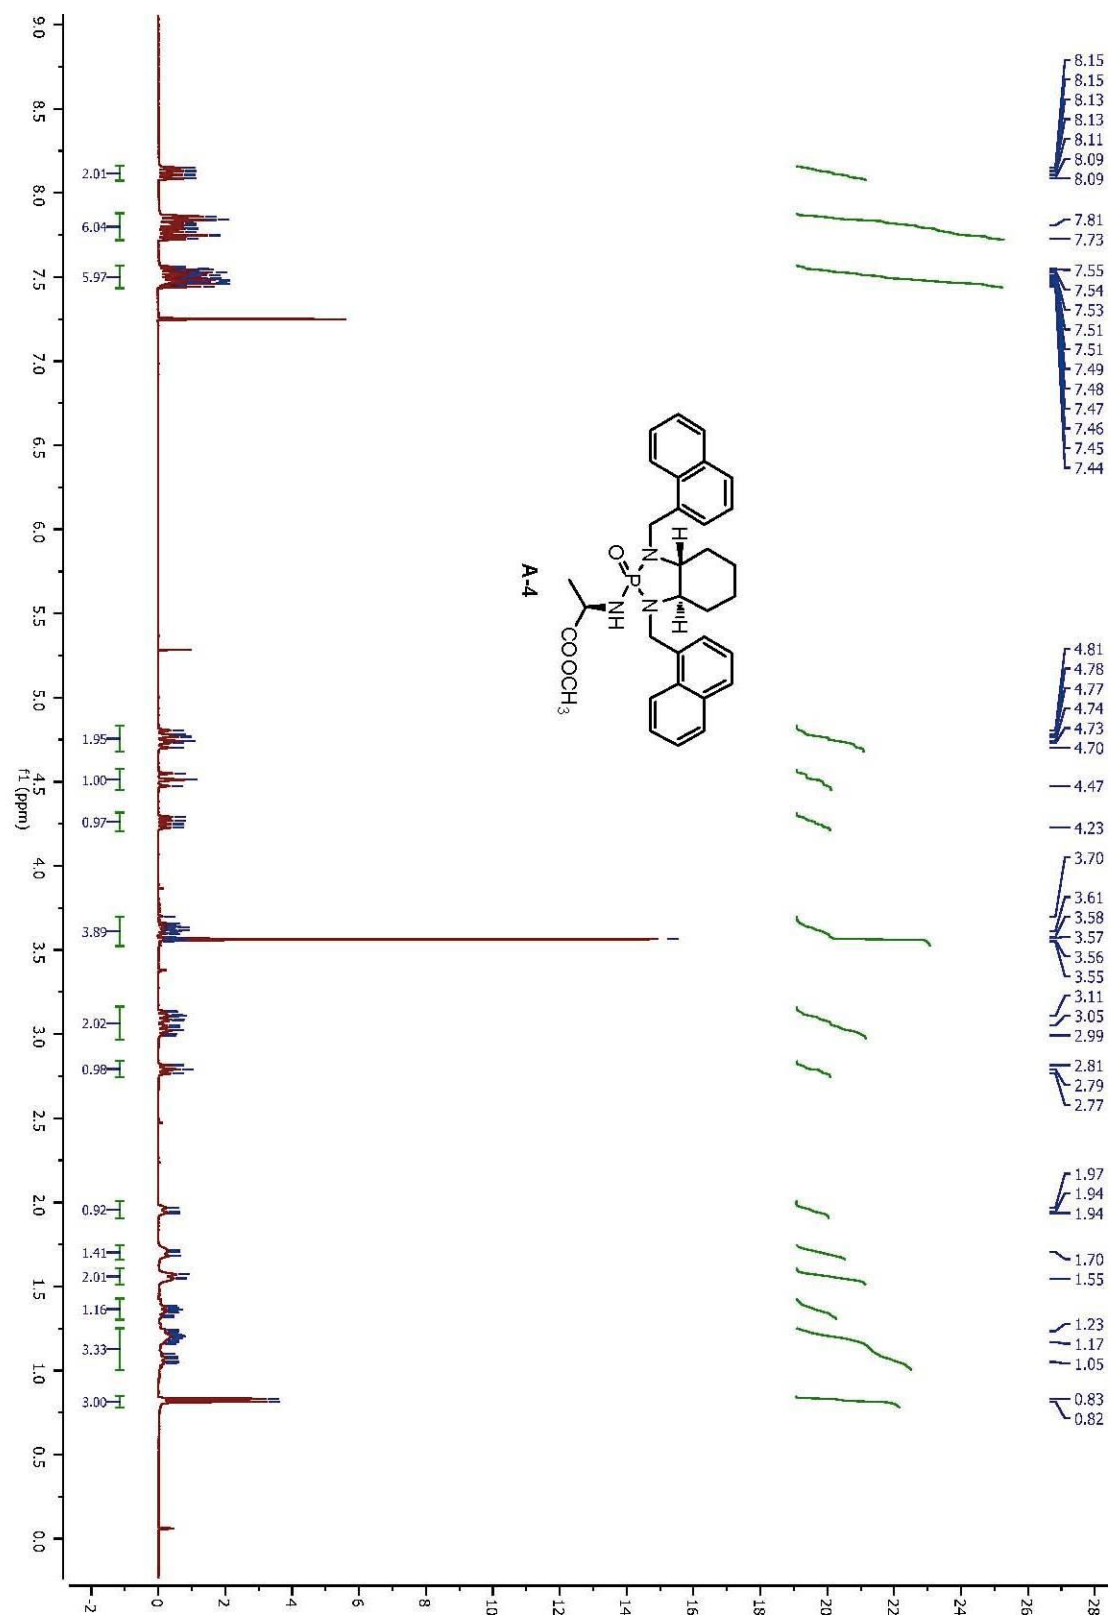

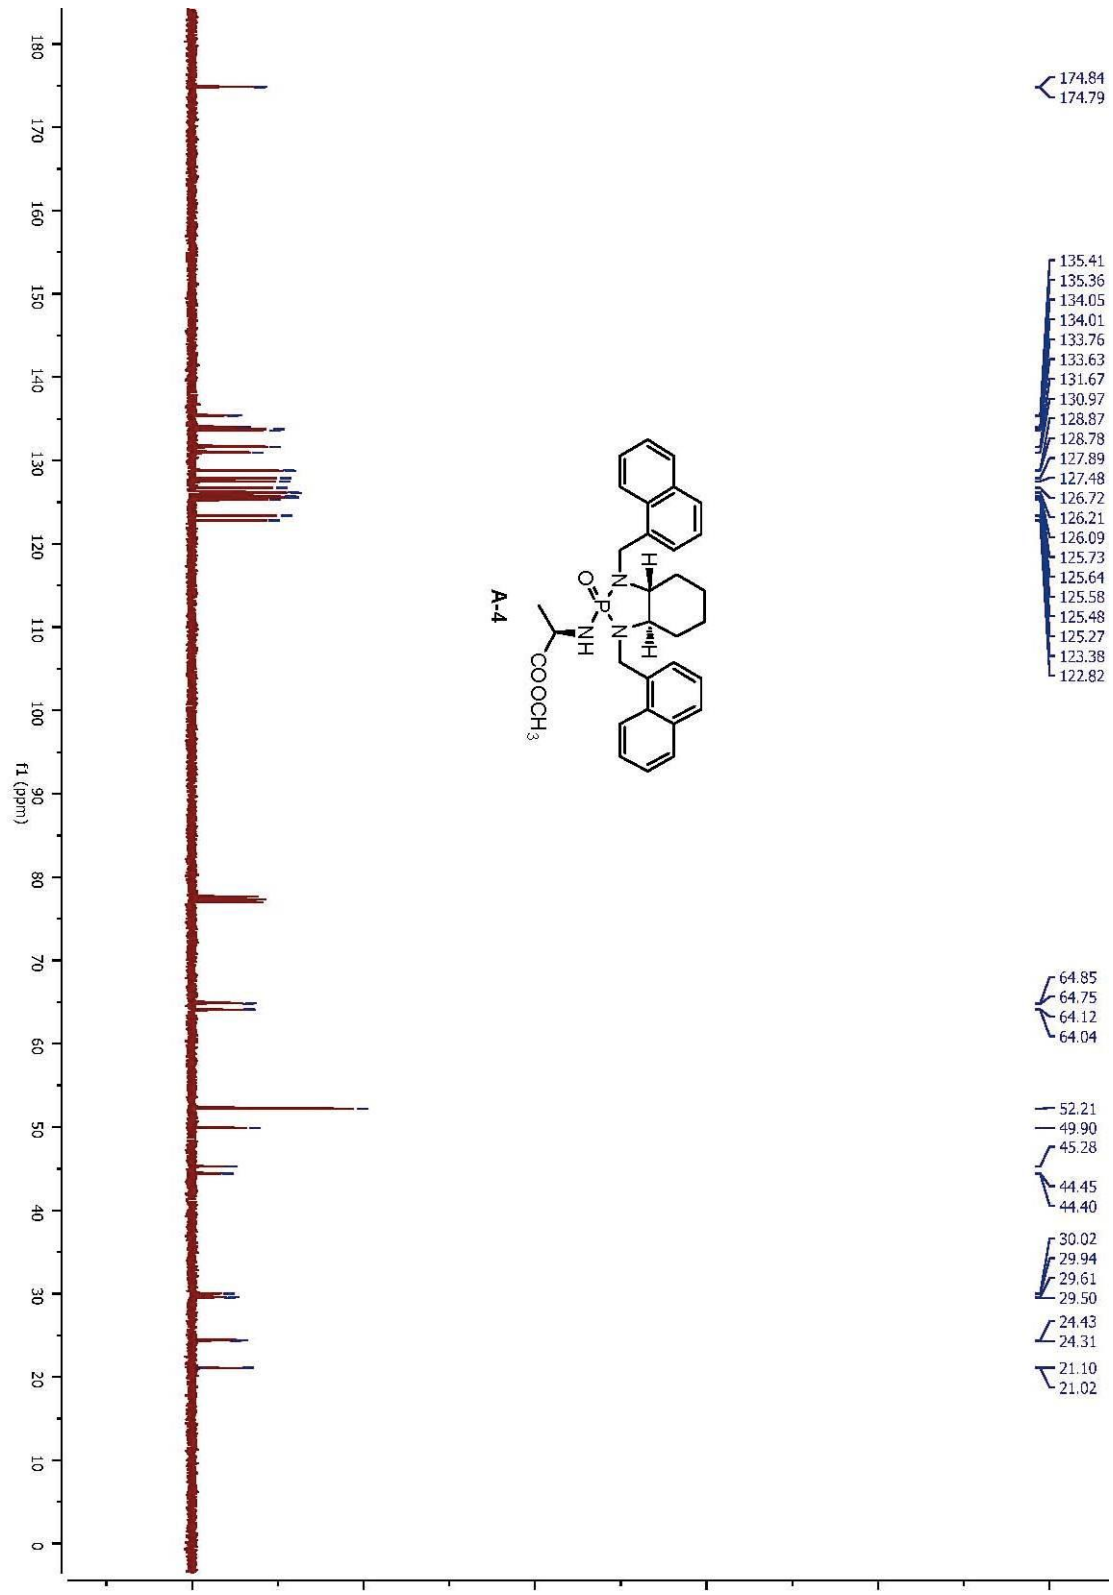

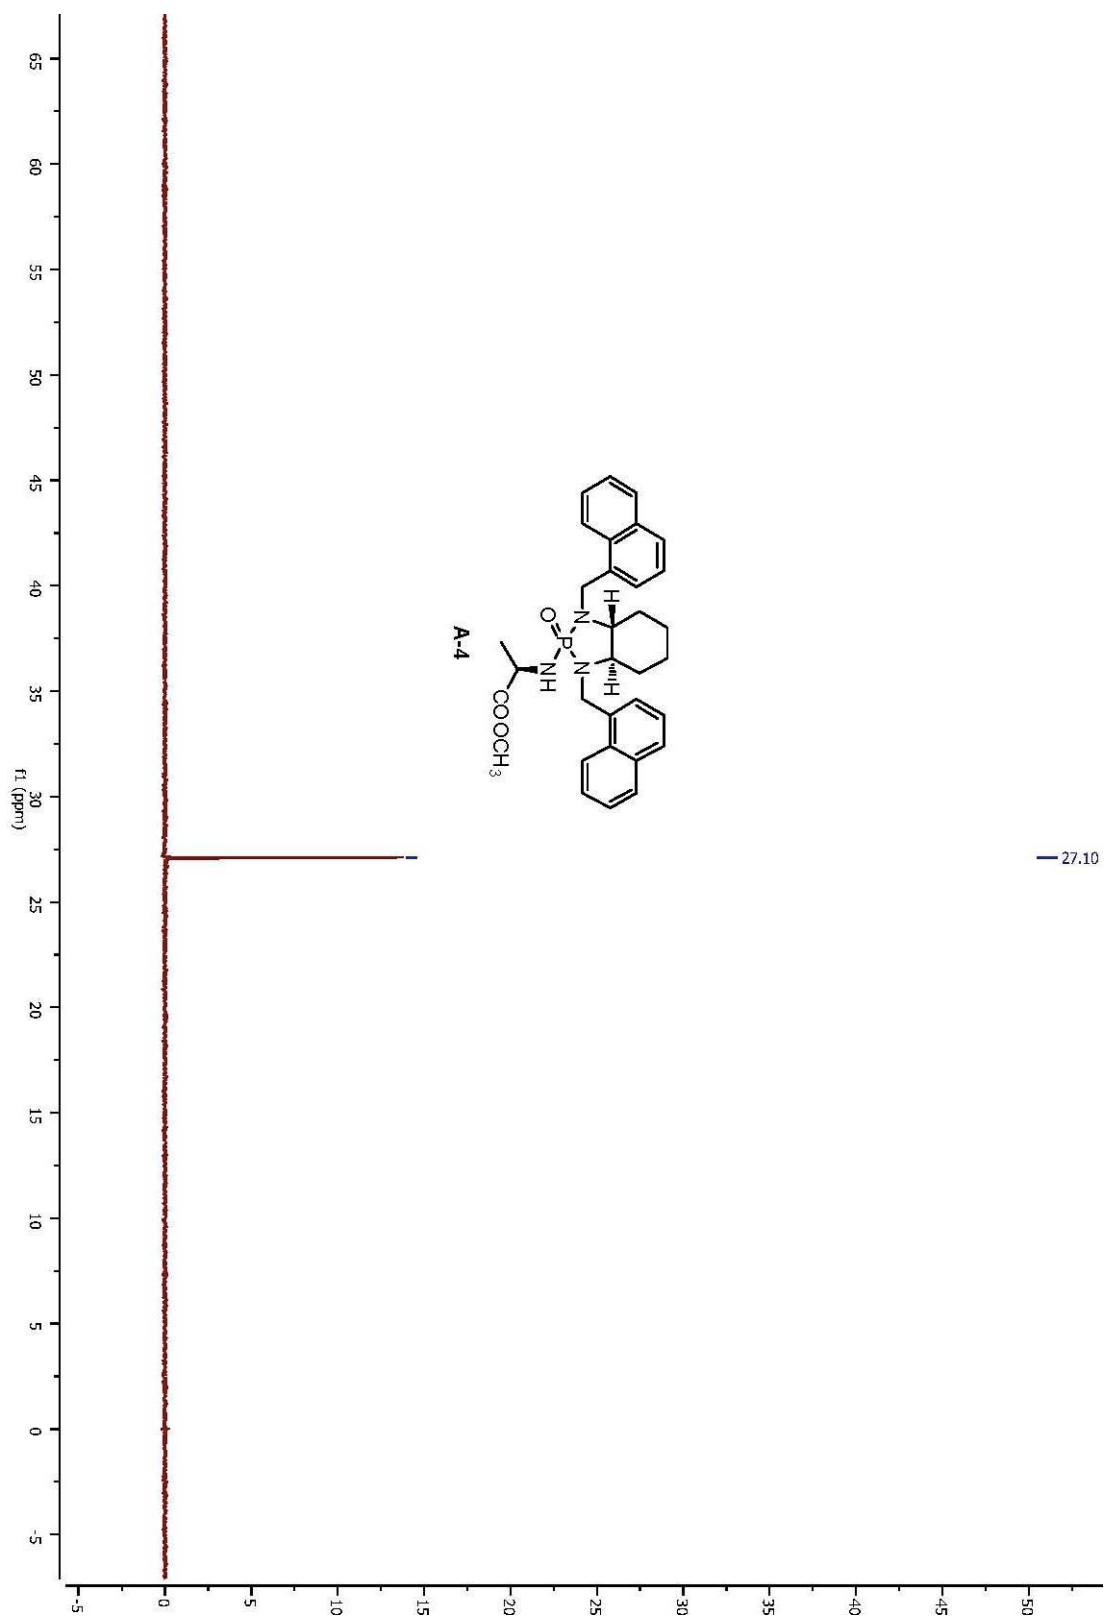

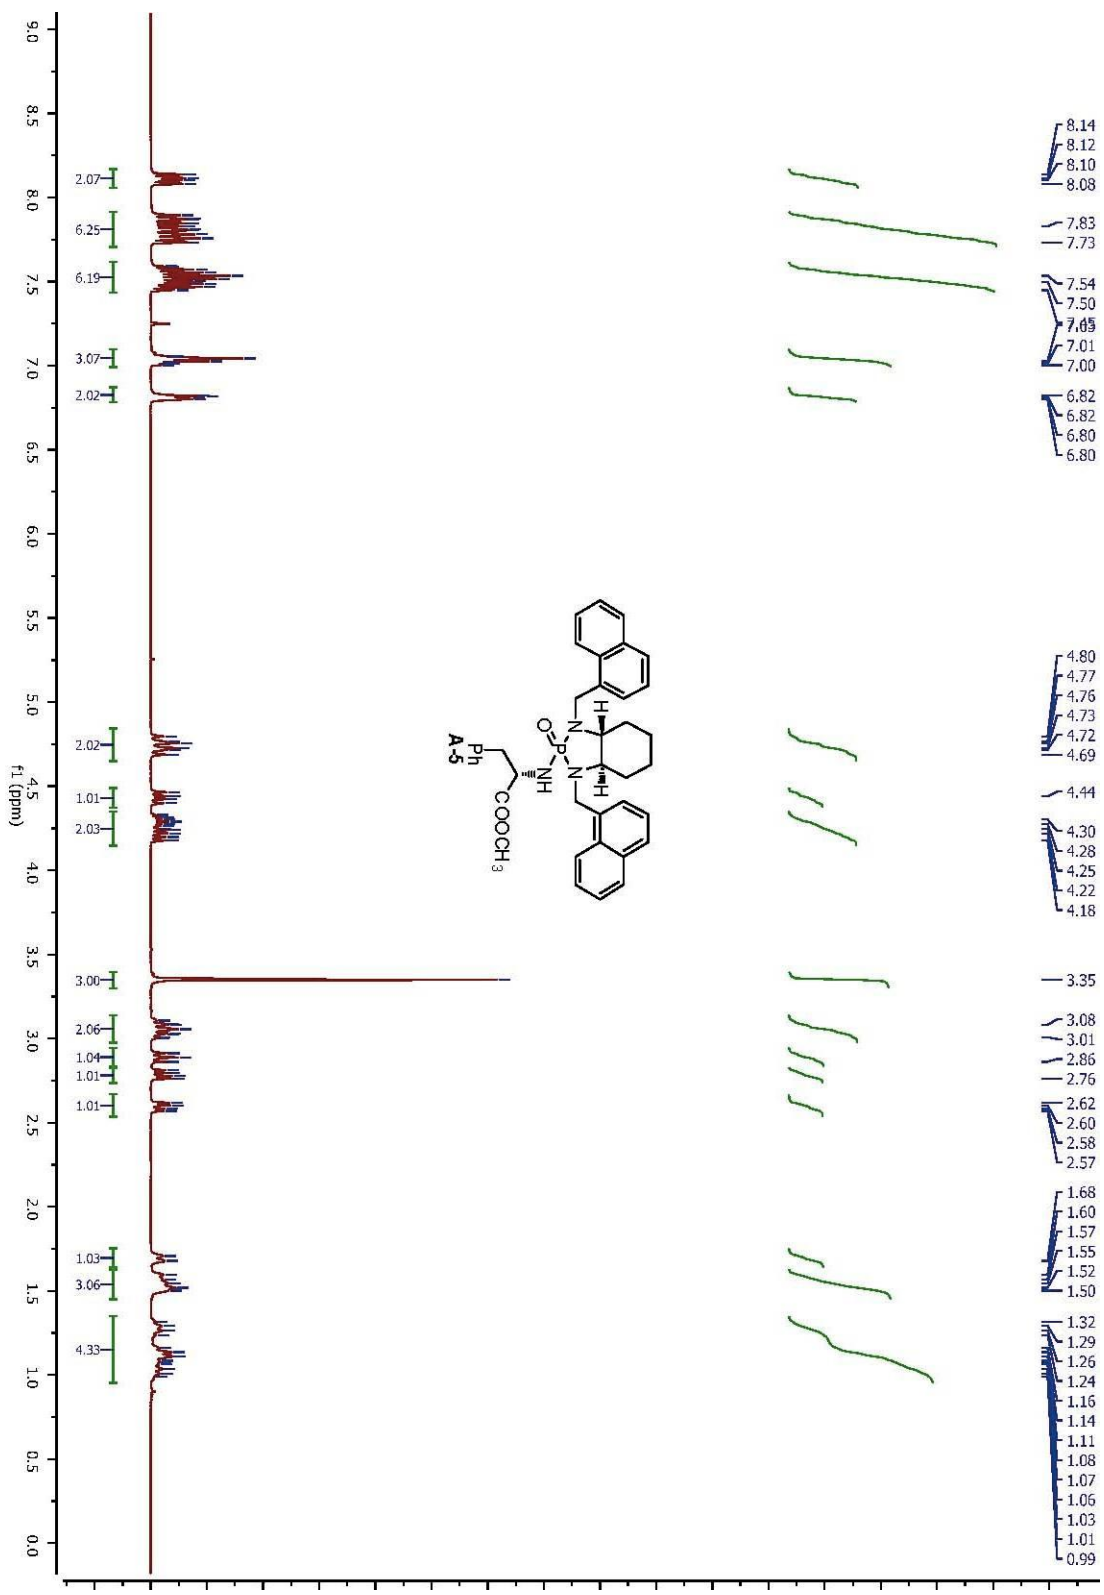

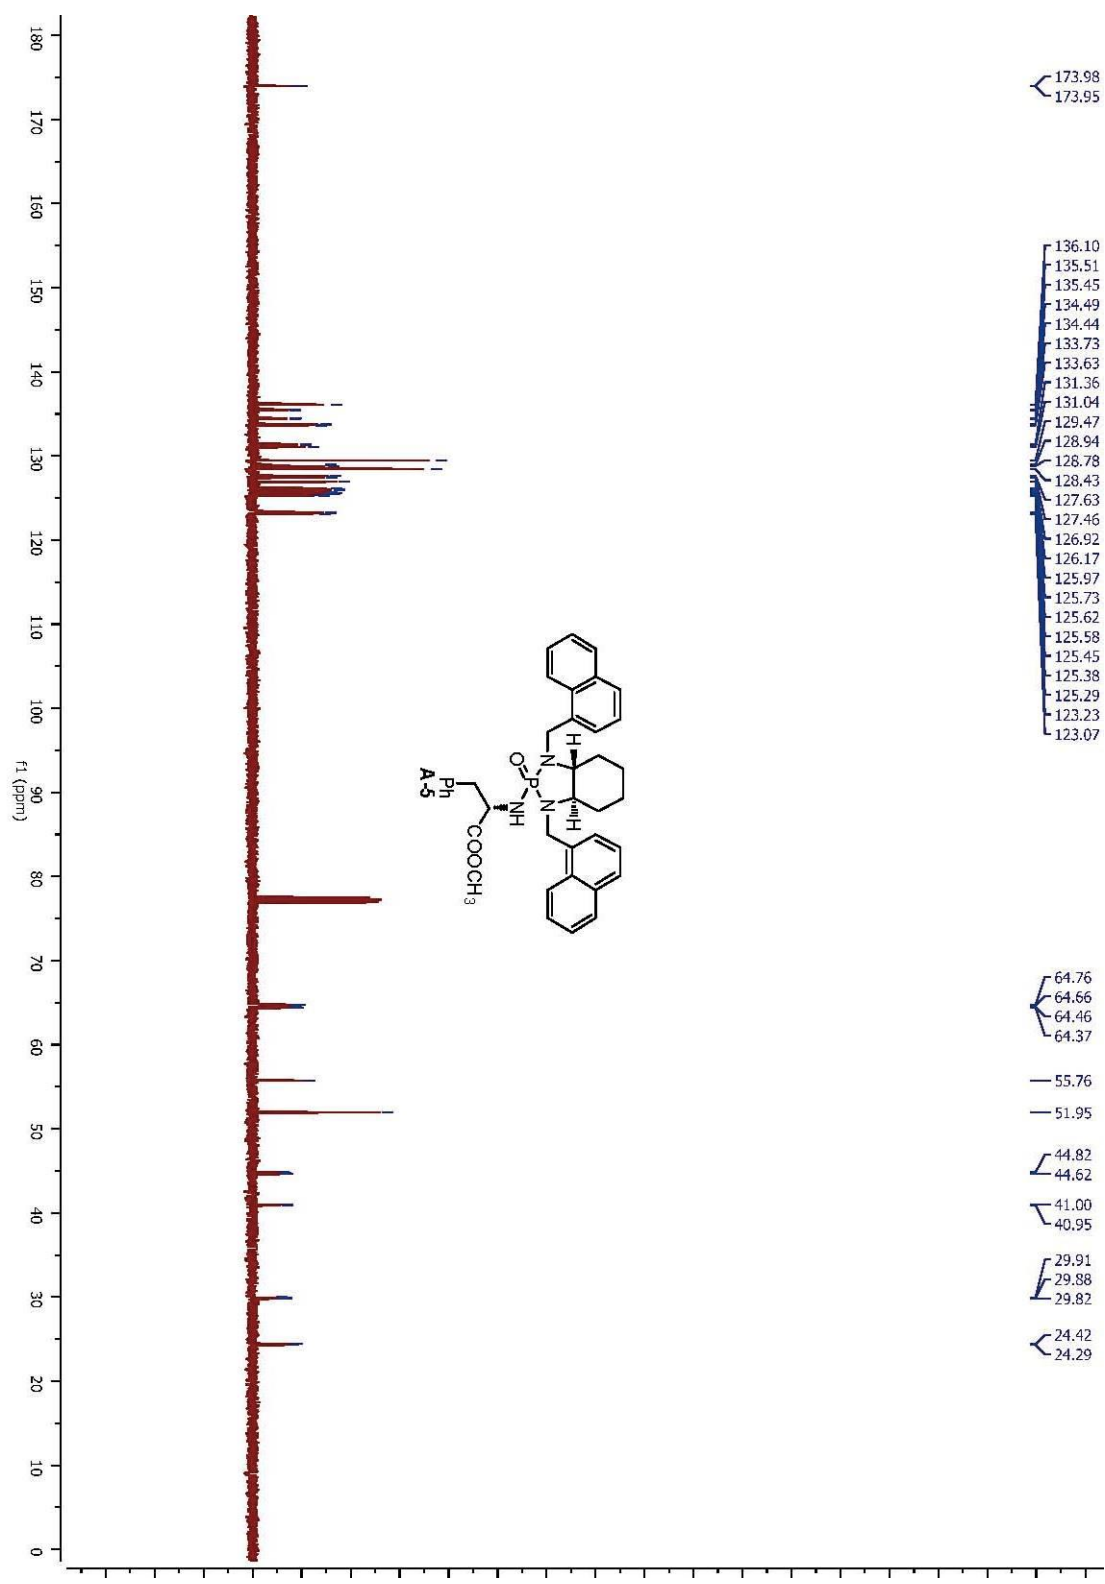



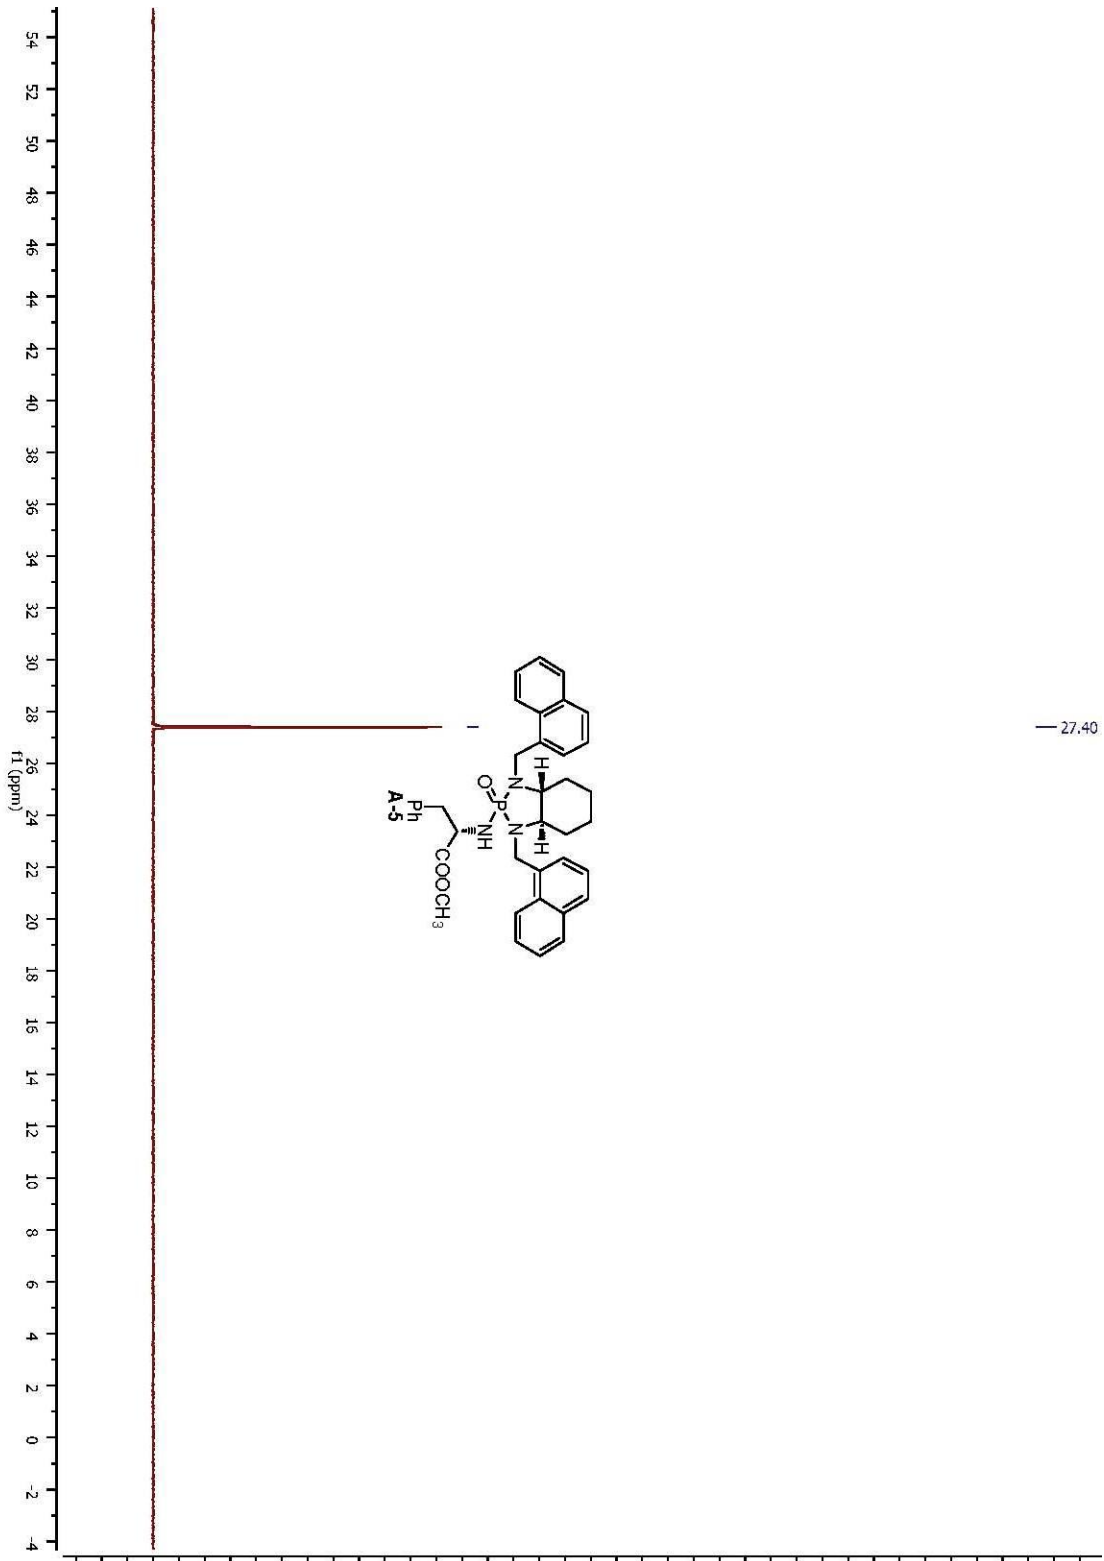

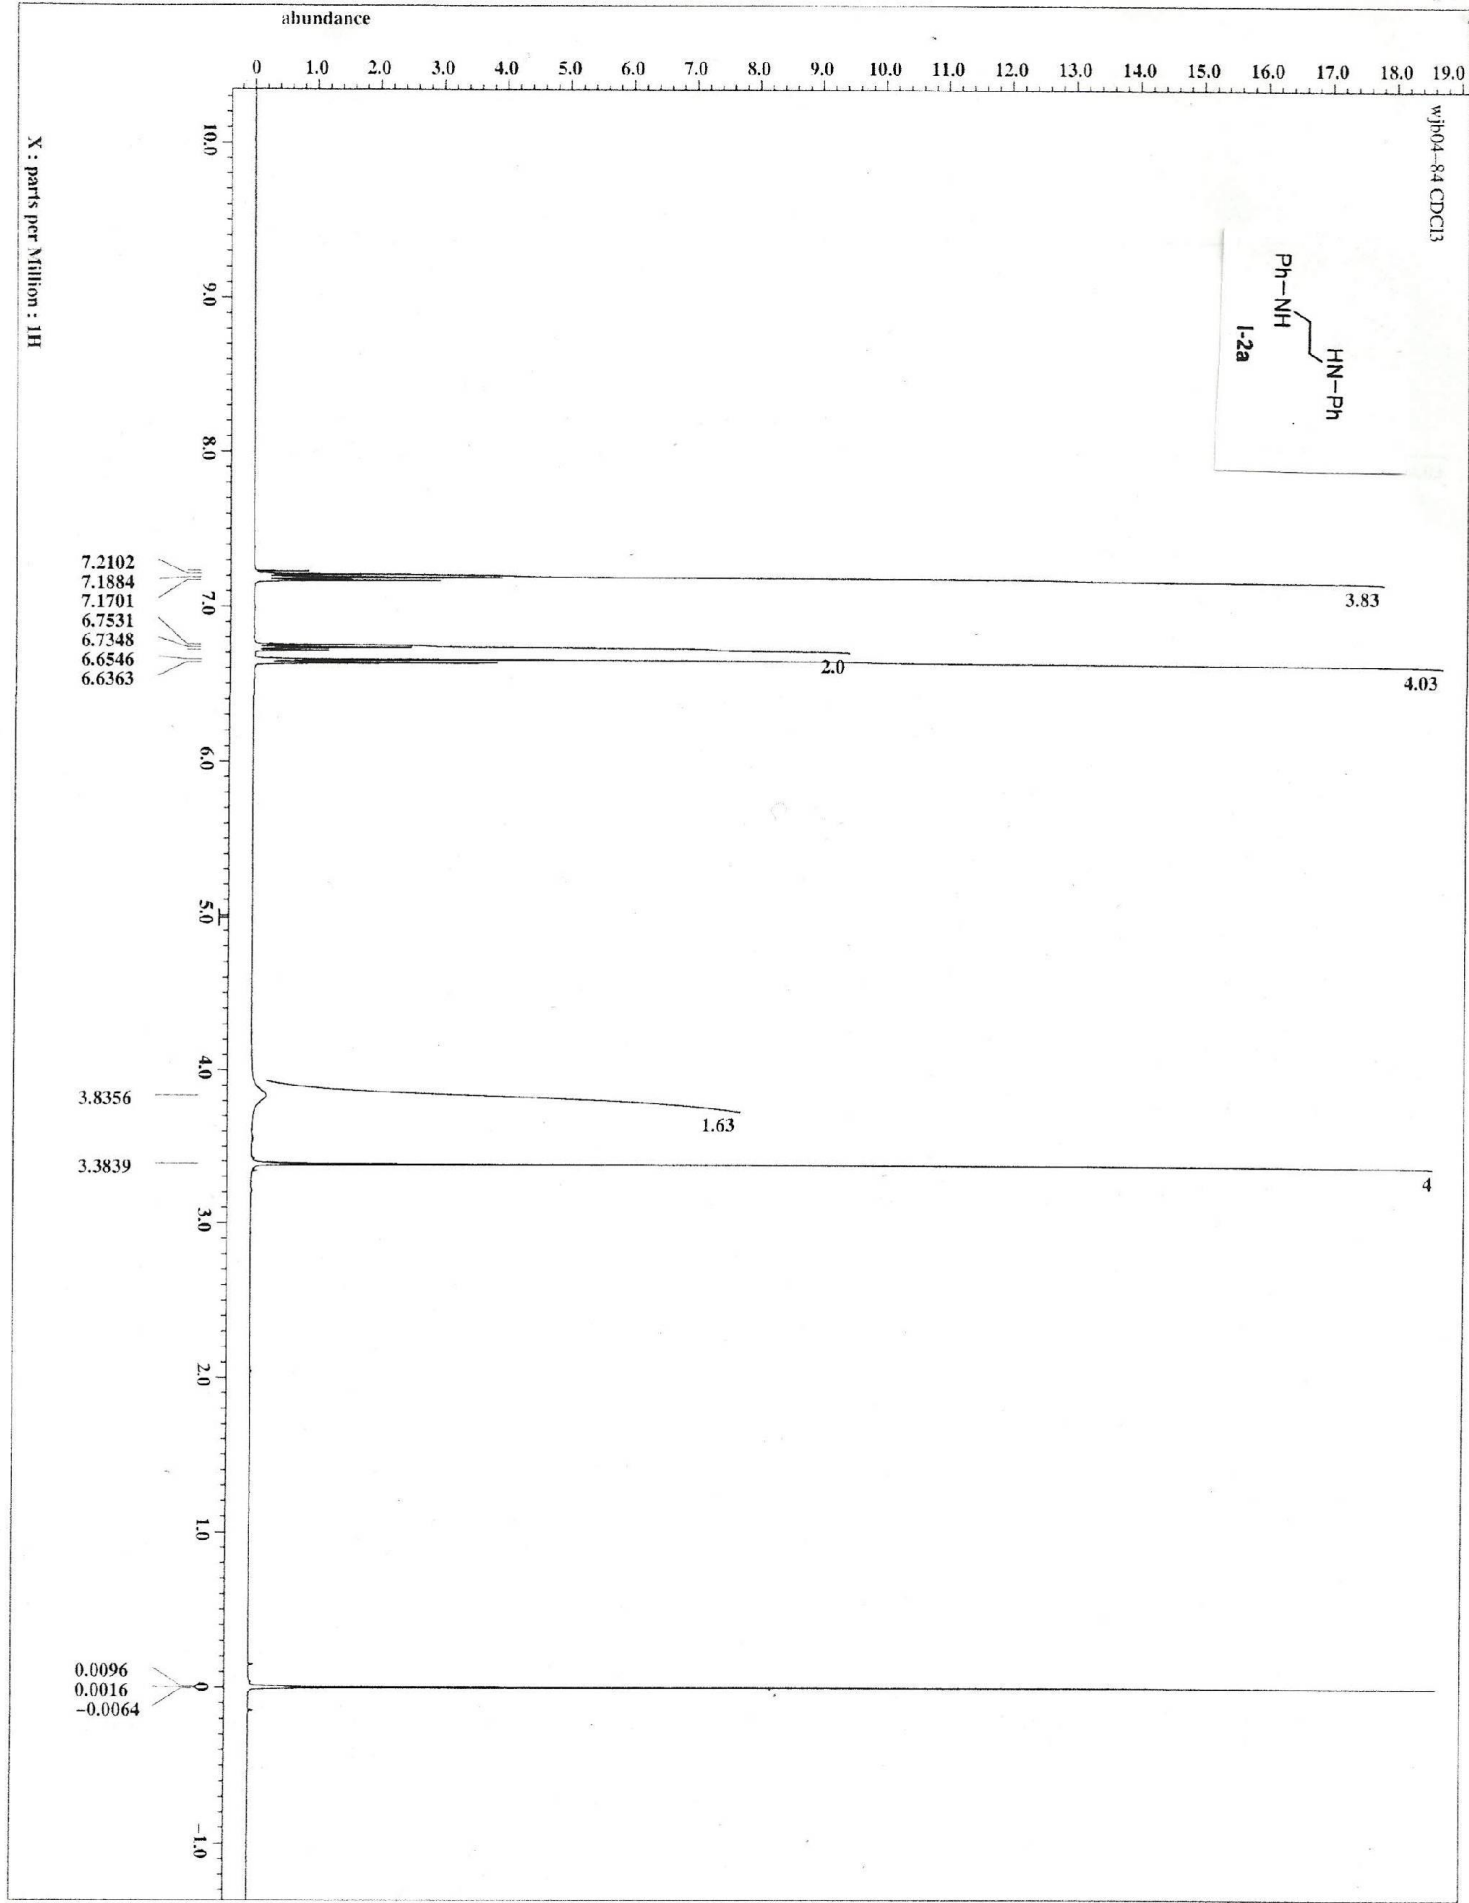

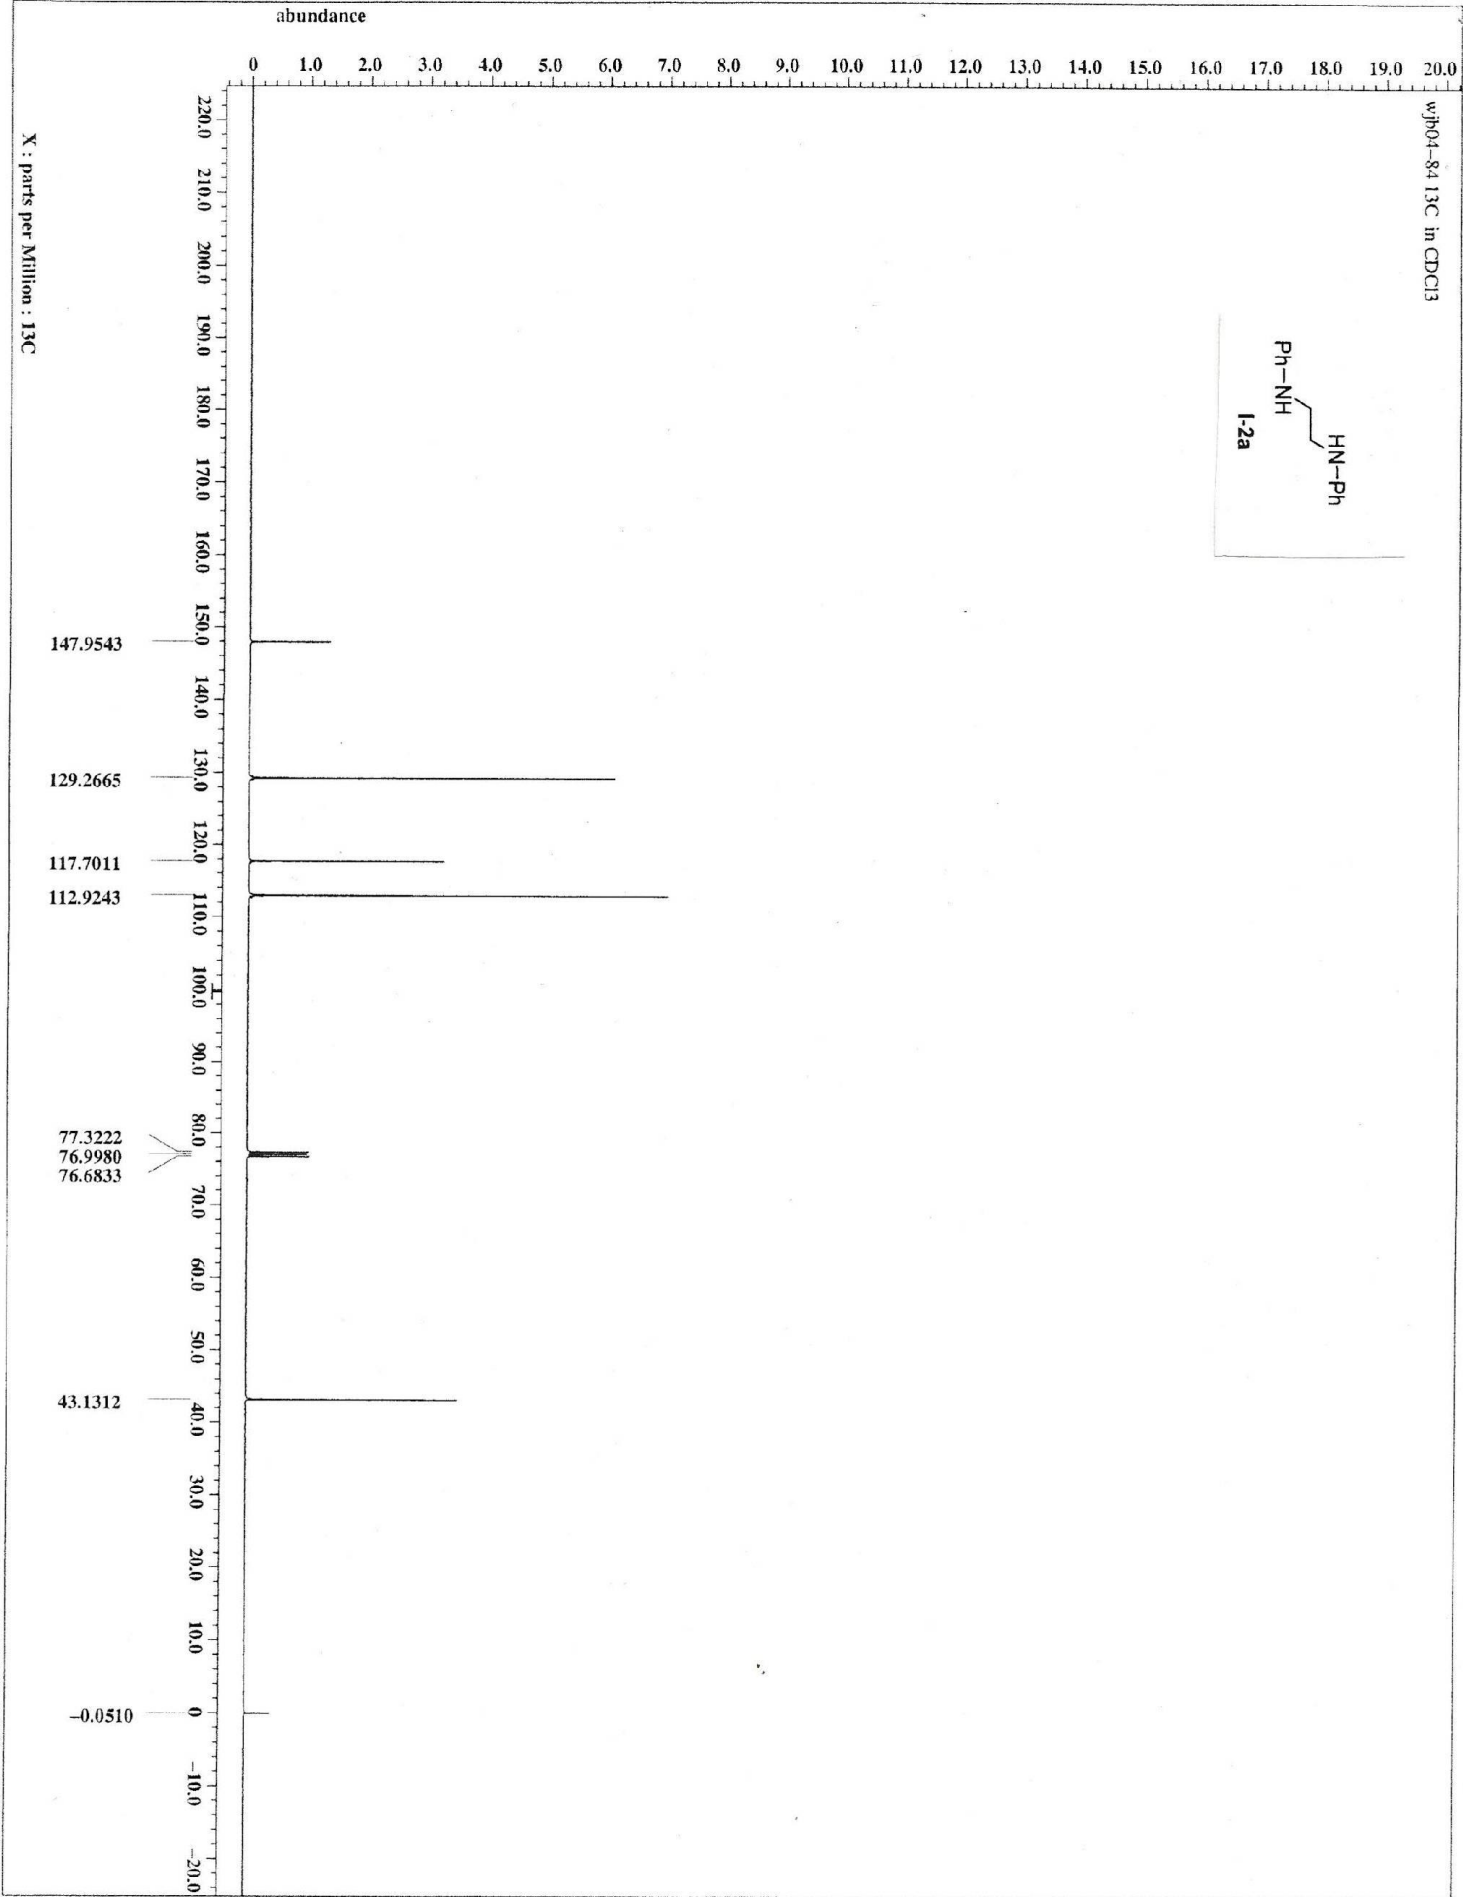

UJB 04-84

#276 RT: 1.011 AV: 10 IT: 4.481 ST: 0.20 uS: 1 NL: 1.14E4  
F: ITMS + p ESI Full ms [50.00-1300.00]

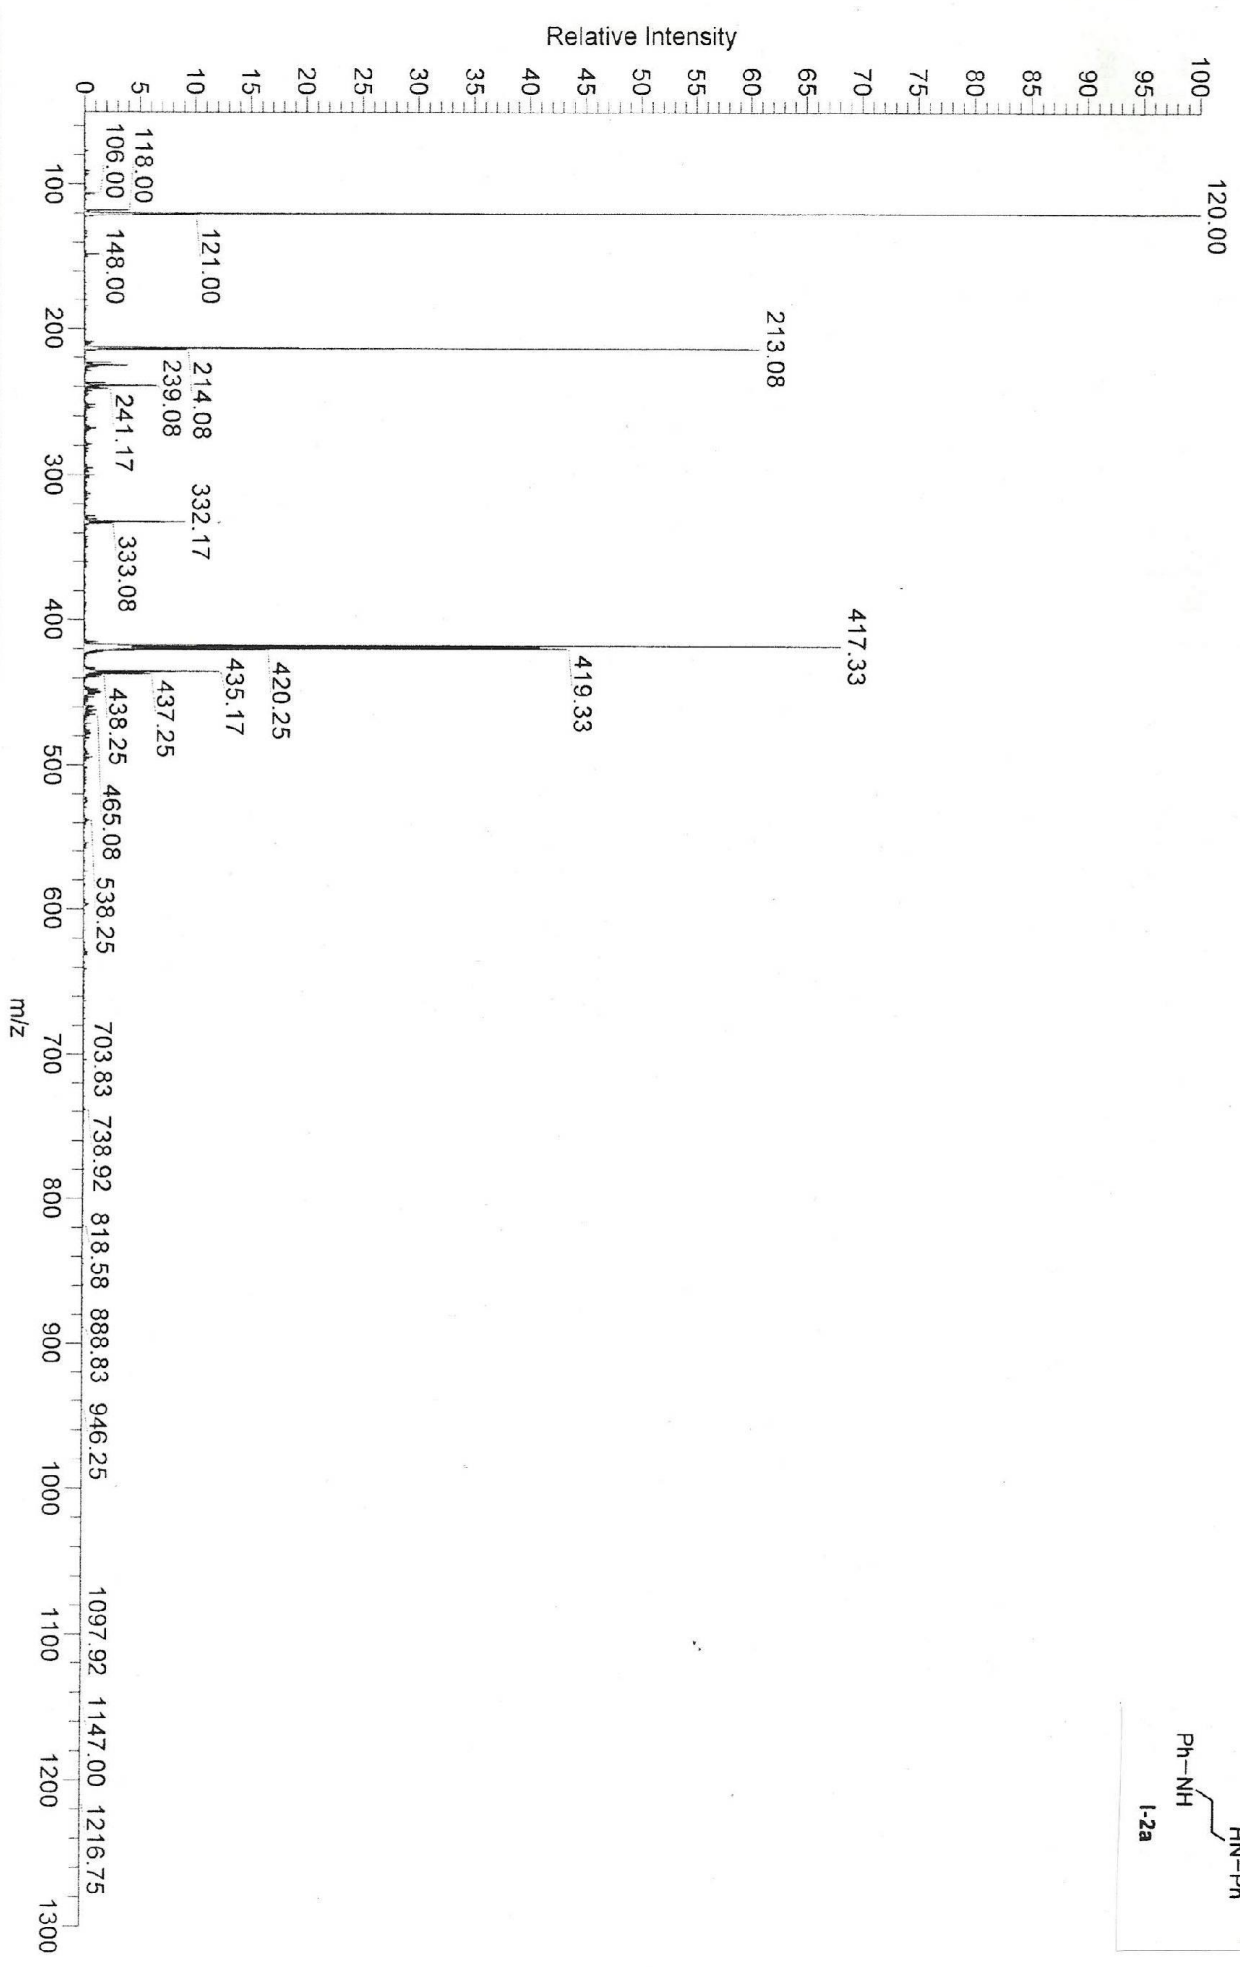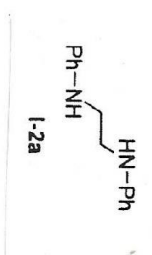

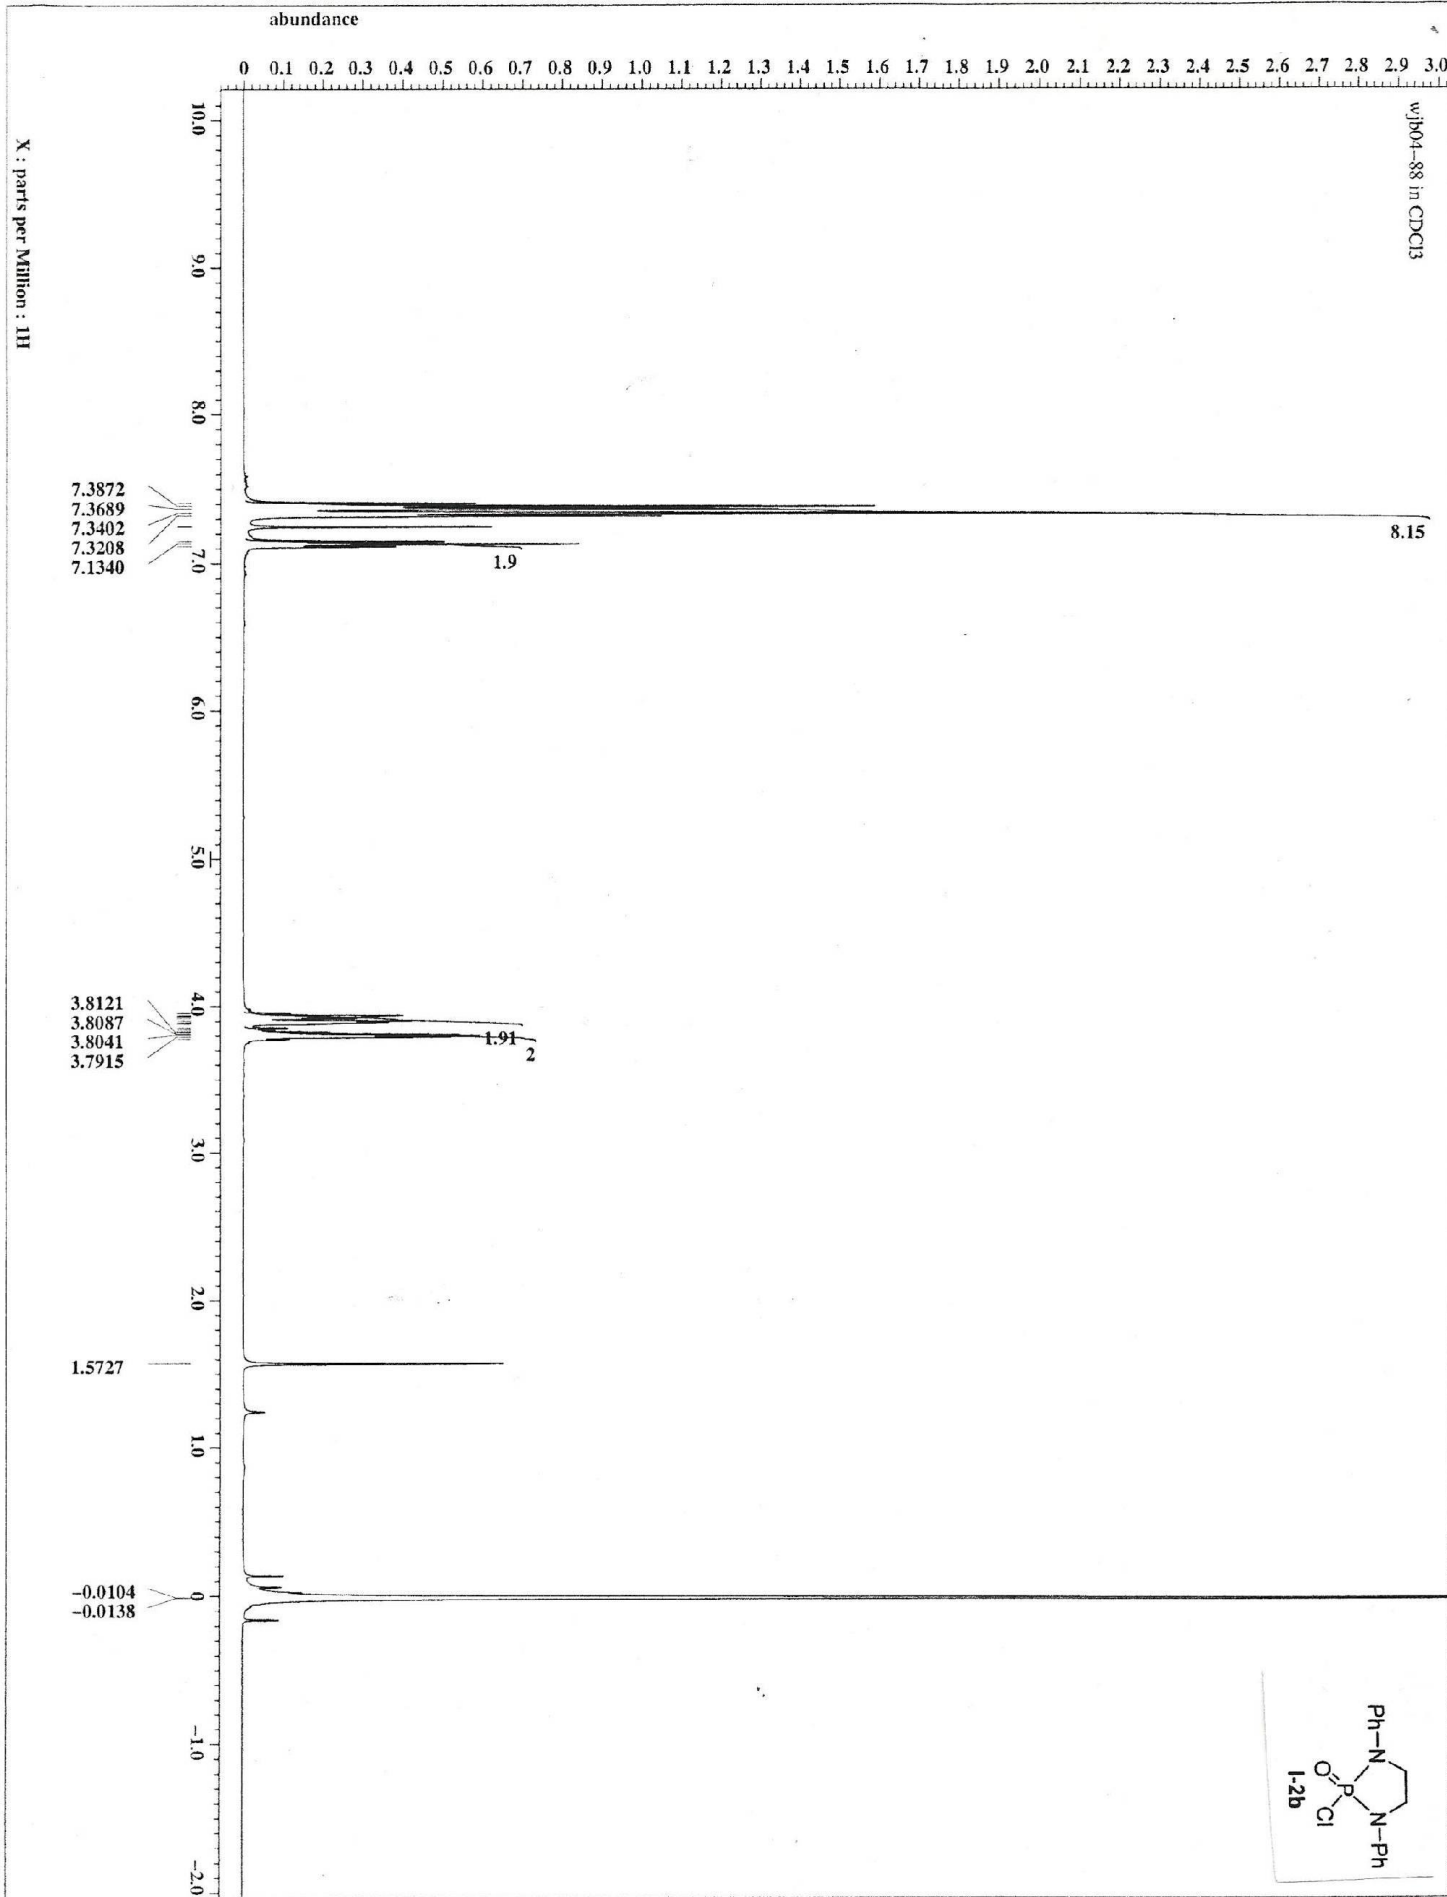

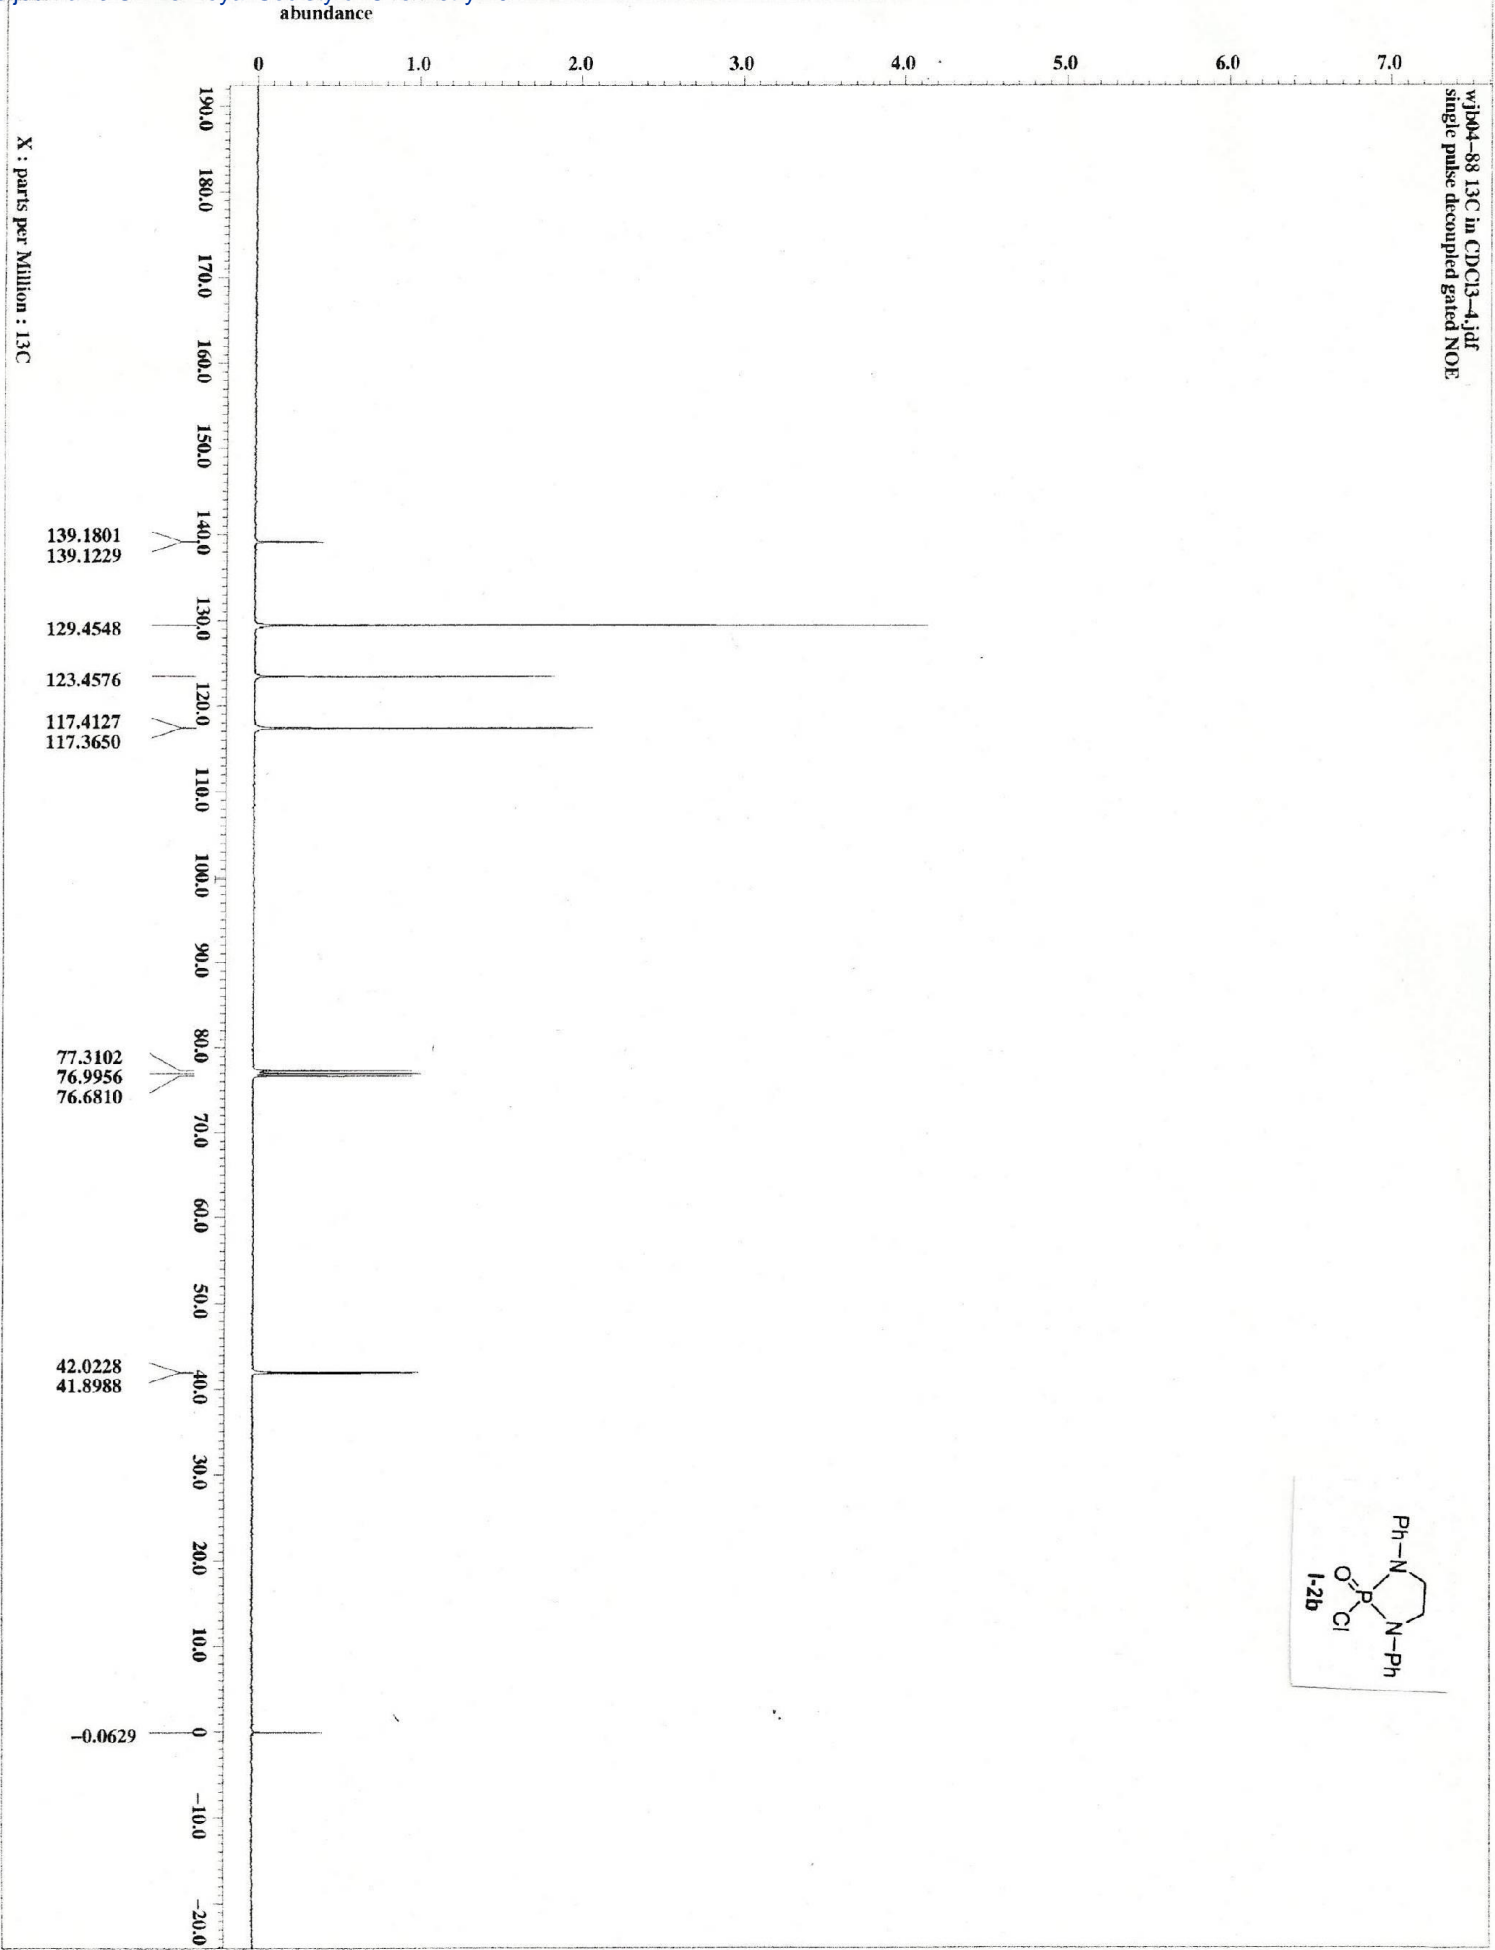

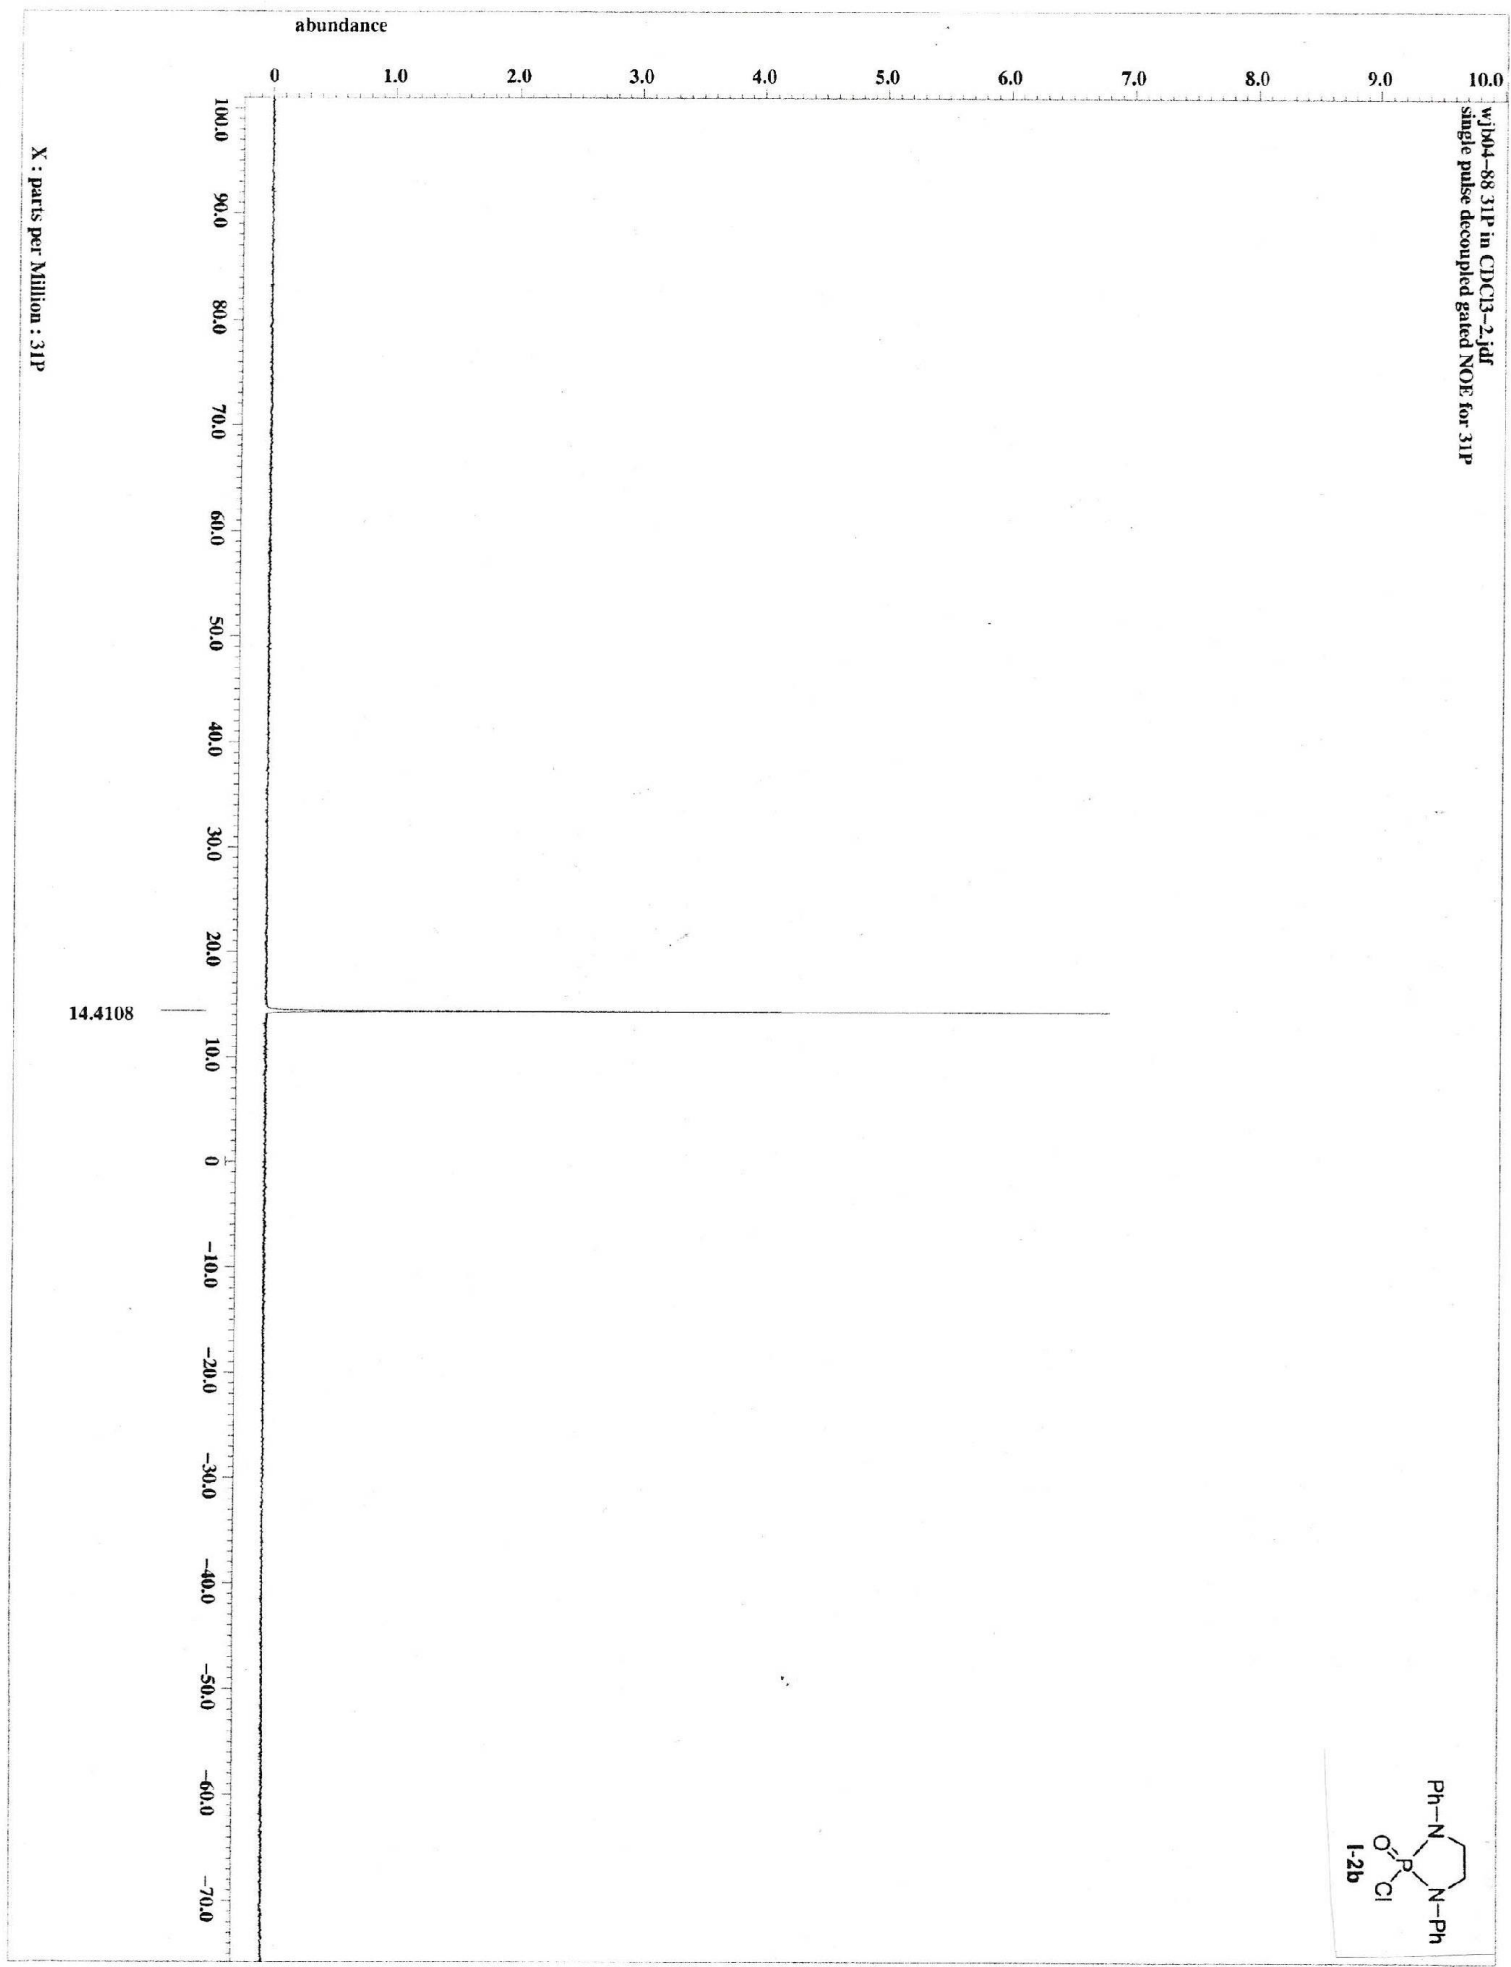



W04-88\_12042012\_01 #328 RT: 2.59 AV: 1 NL: 4.86E6  
T: FTMS + p ESI Full ms [150.00-2000.00]

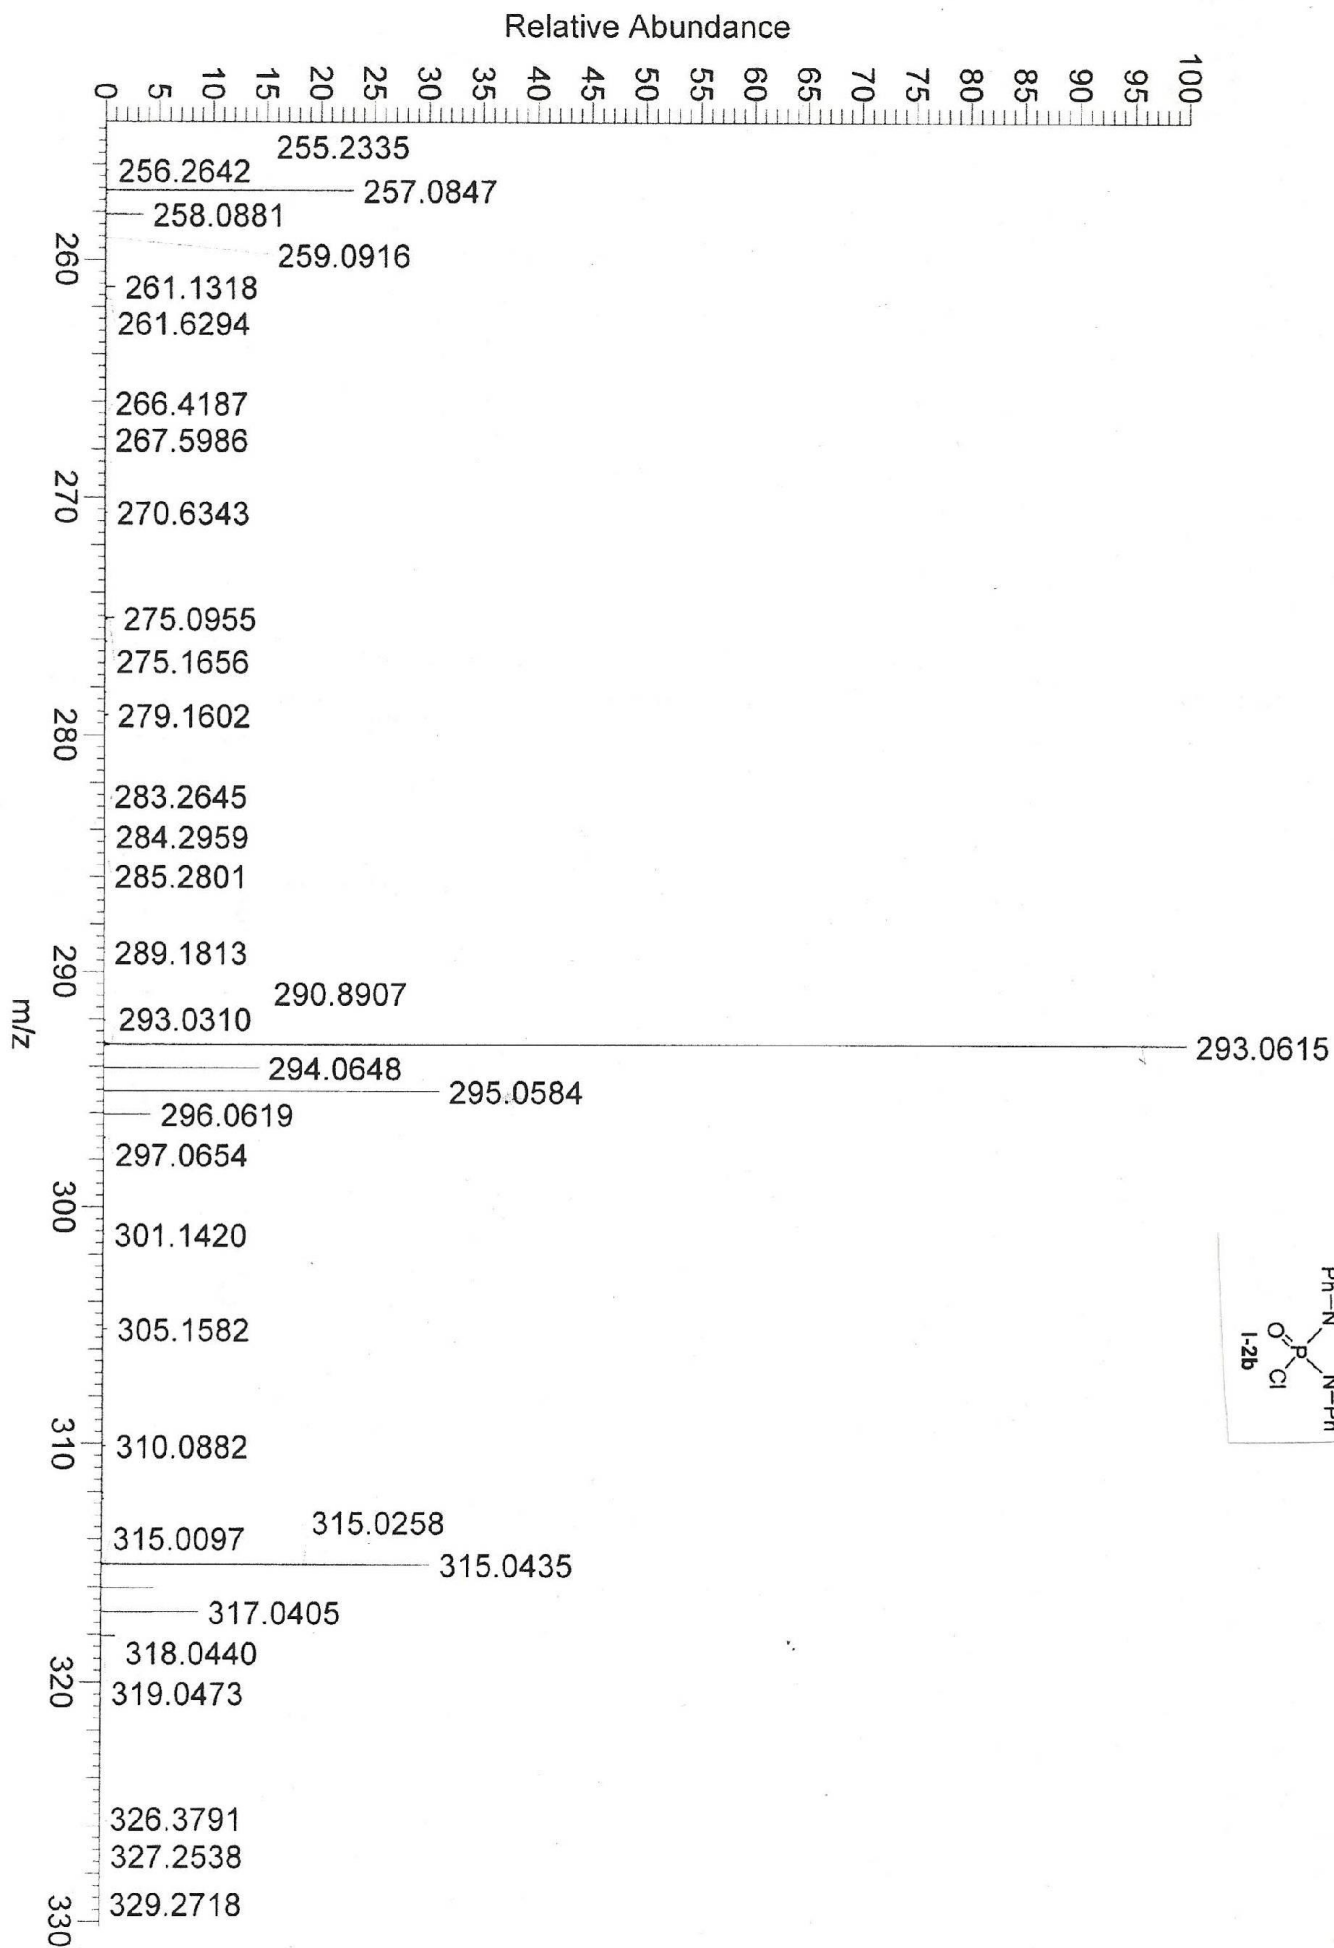



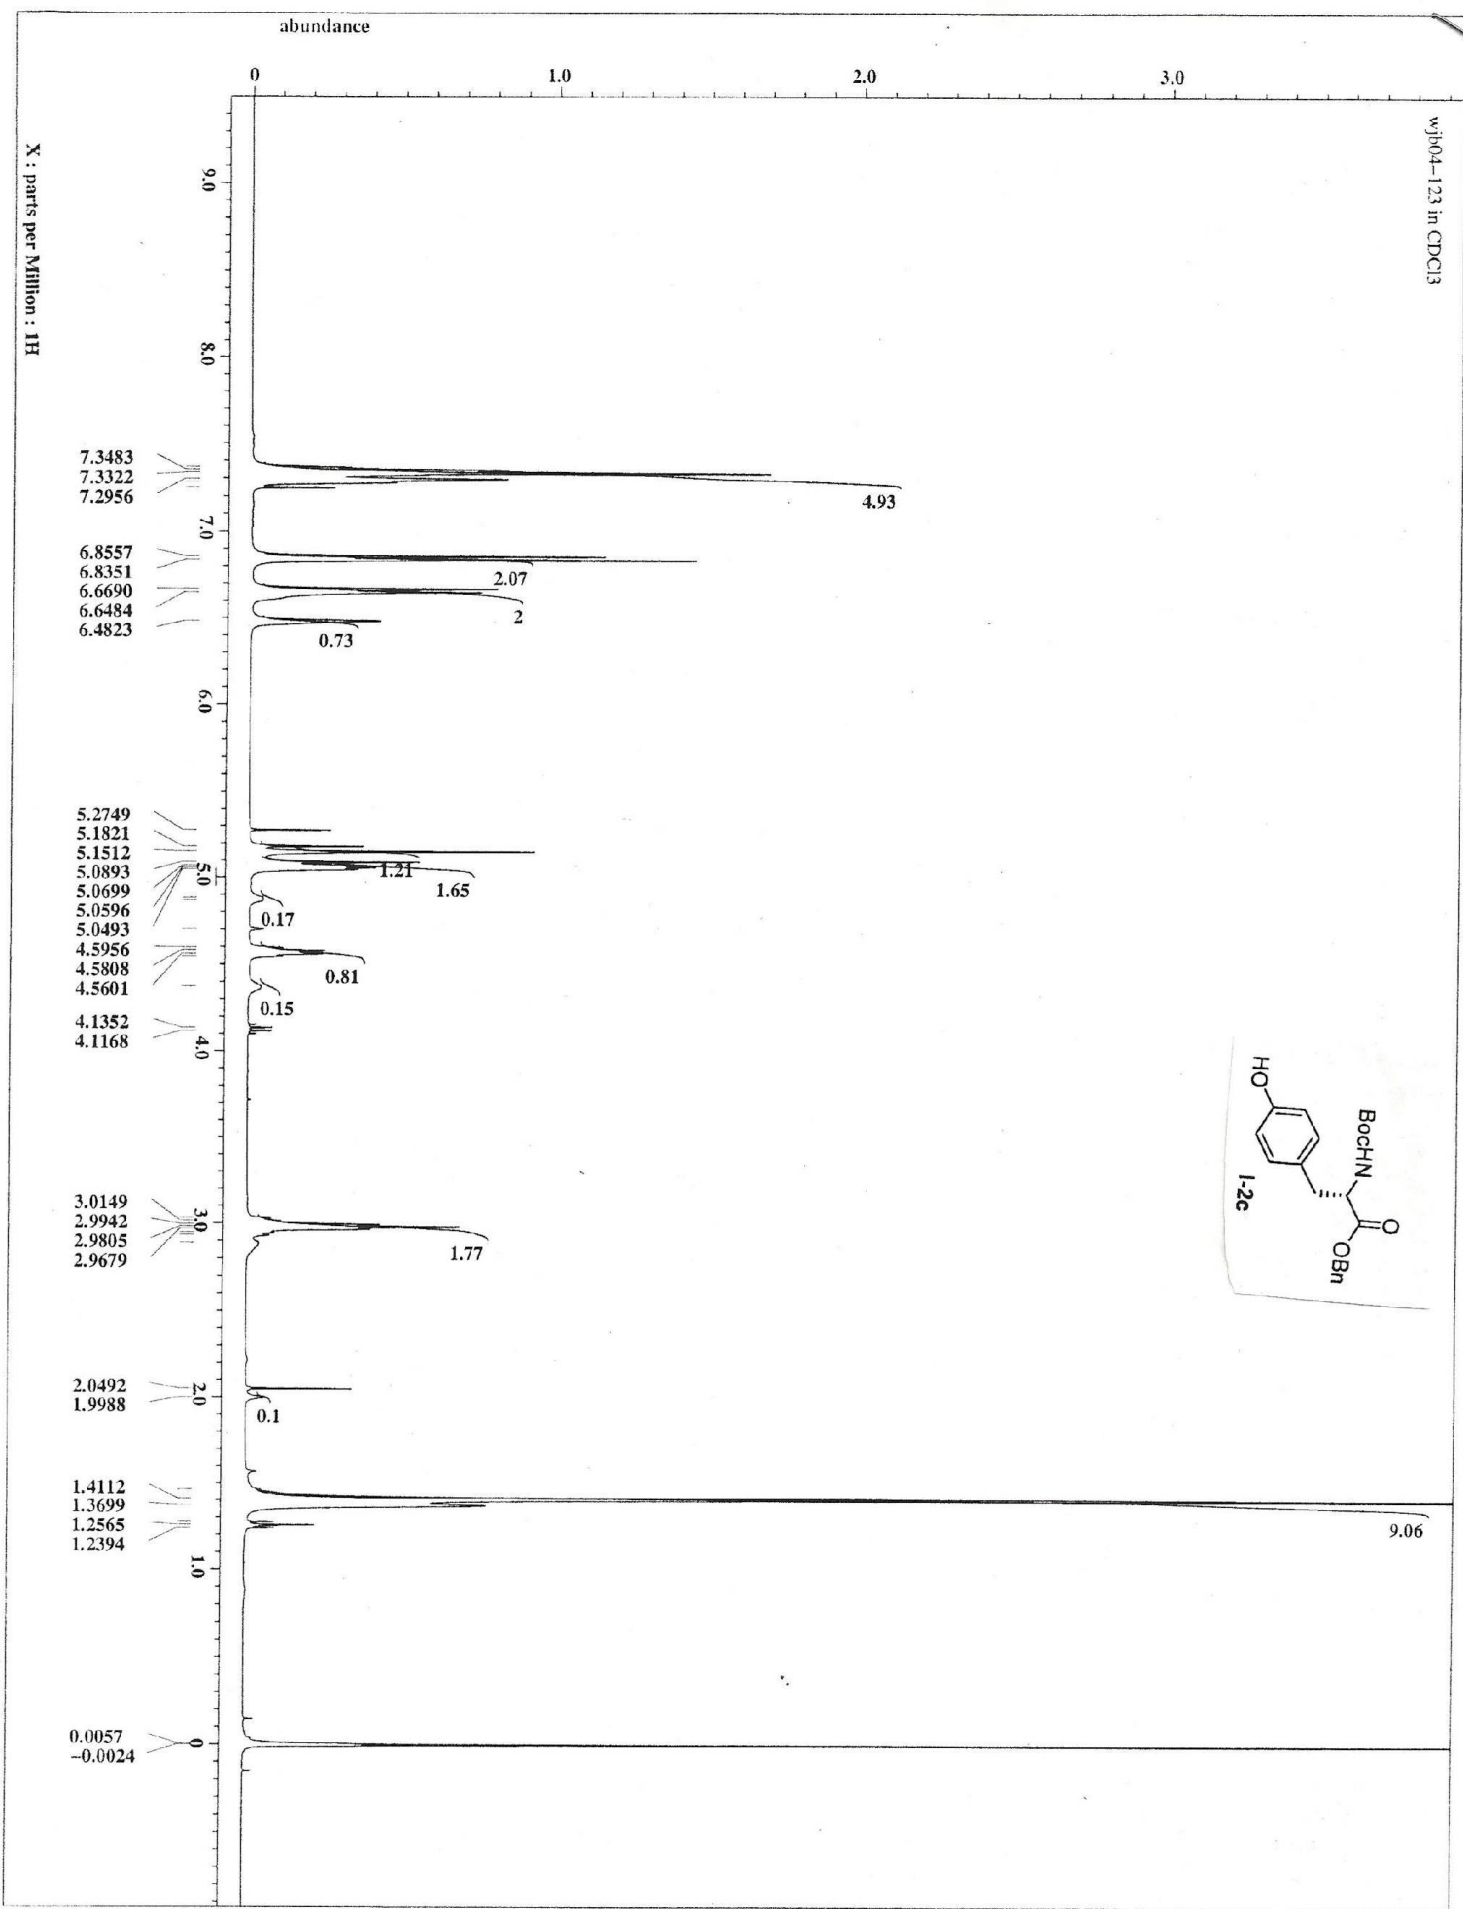

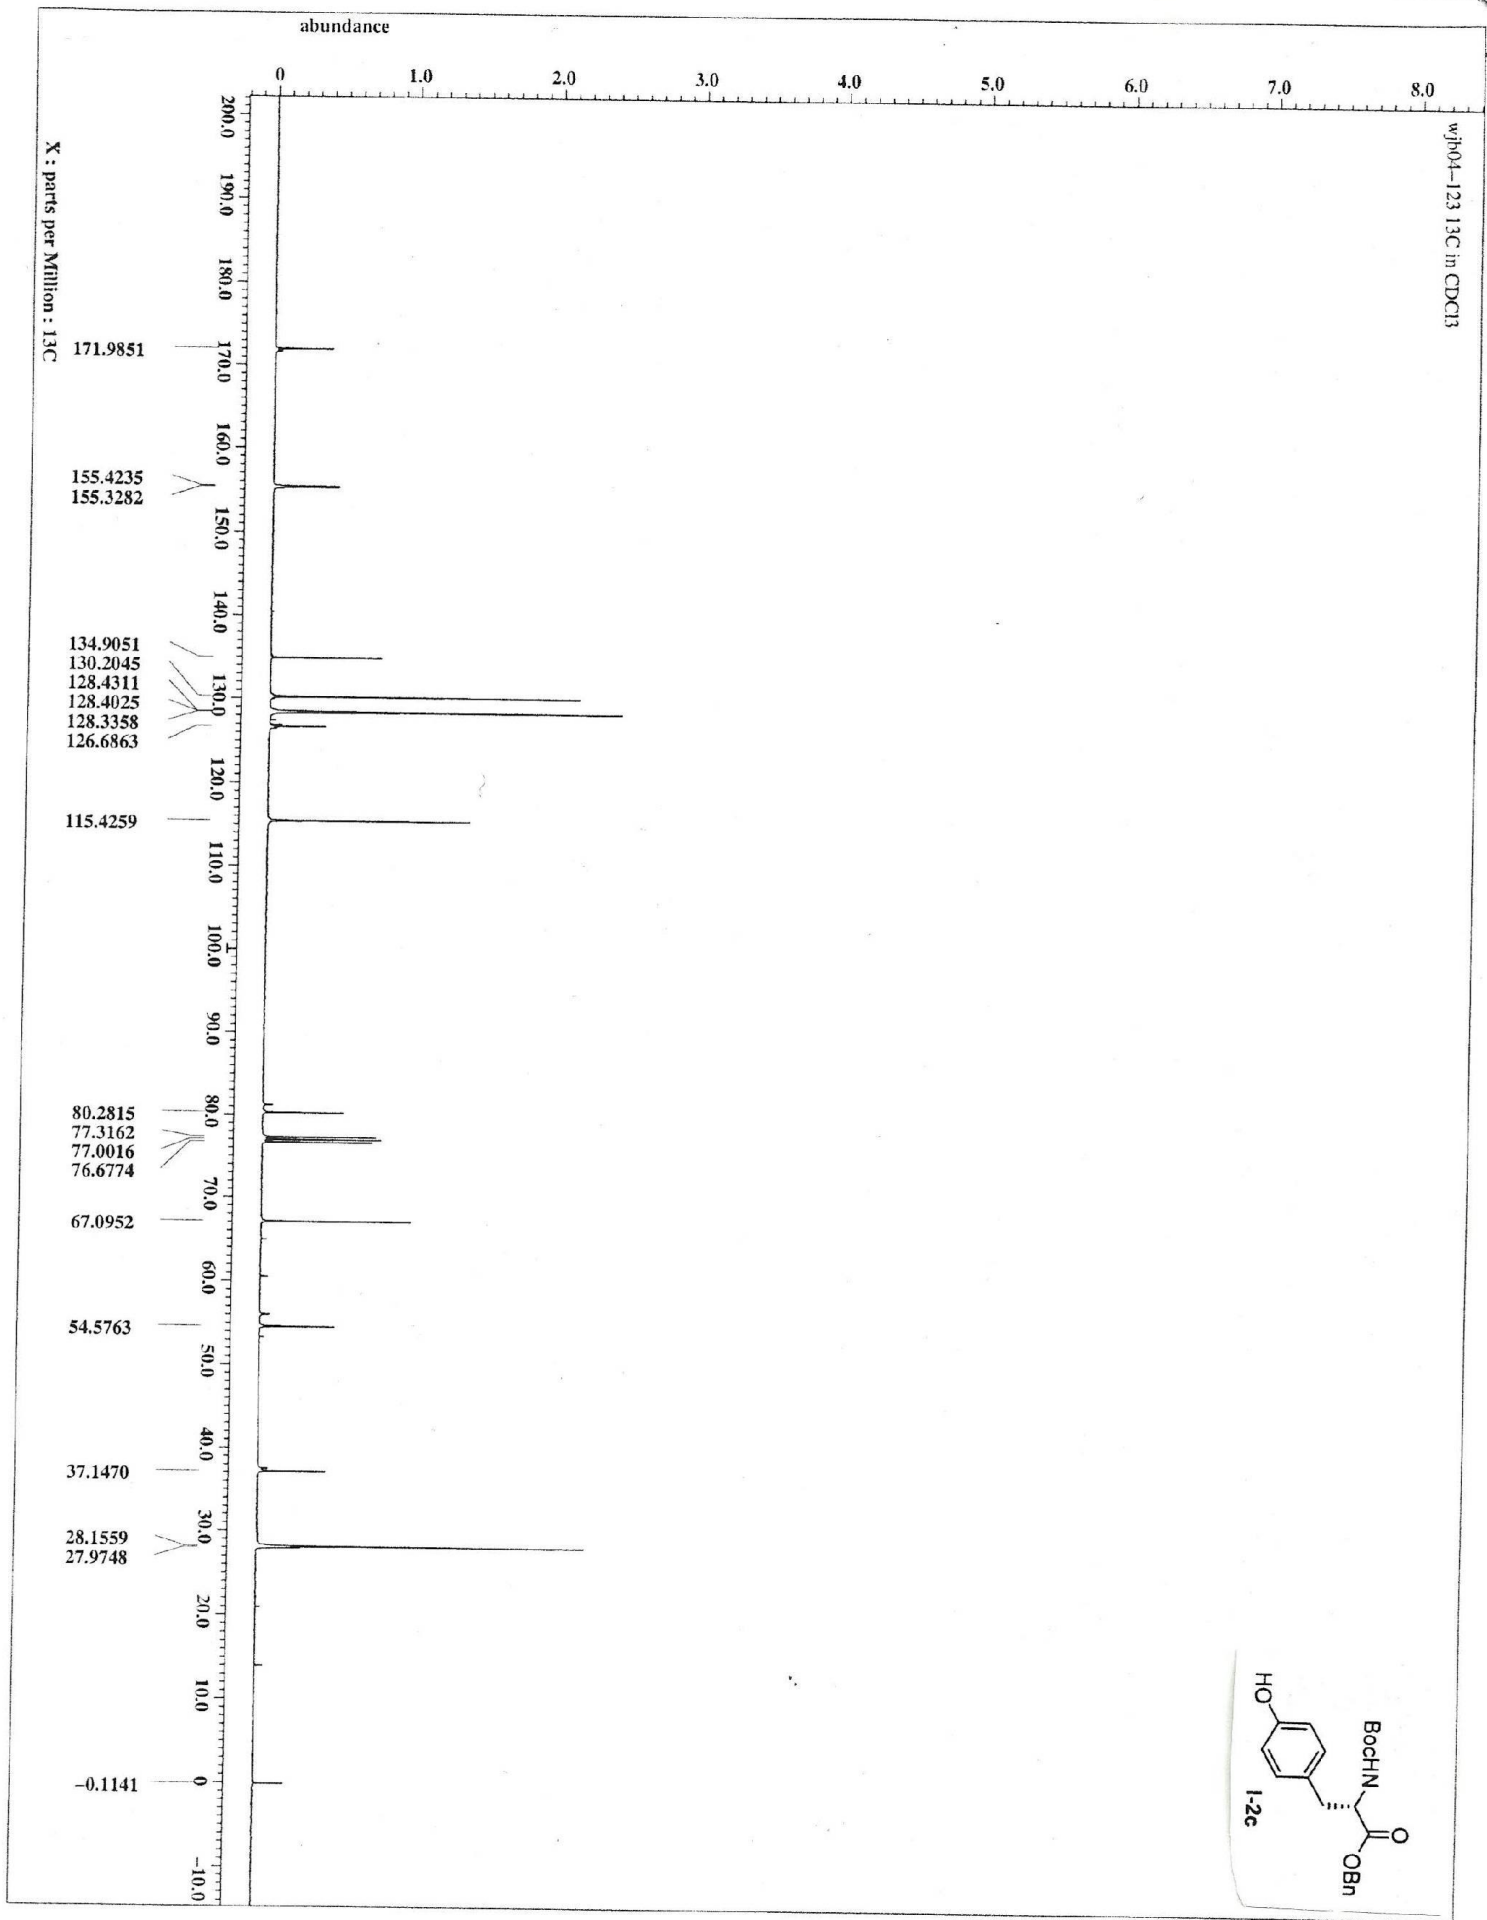

#115 RT: 0.959 AV: 3 IT: 100.000 ST: 1.40 uS: 4 NL: 6.15E1  
F: ITMS+ p ESI Full ms2 372.00@cid20.00 [100.00-1300.00]

wjB 04 - 123

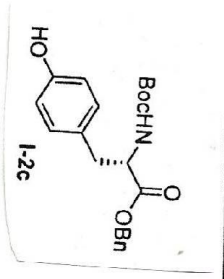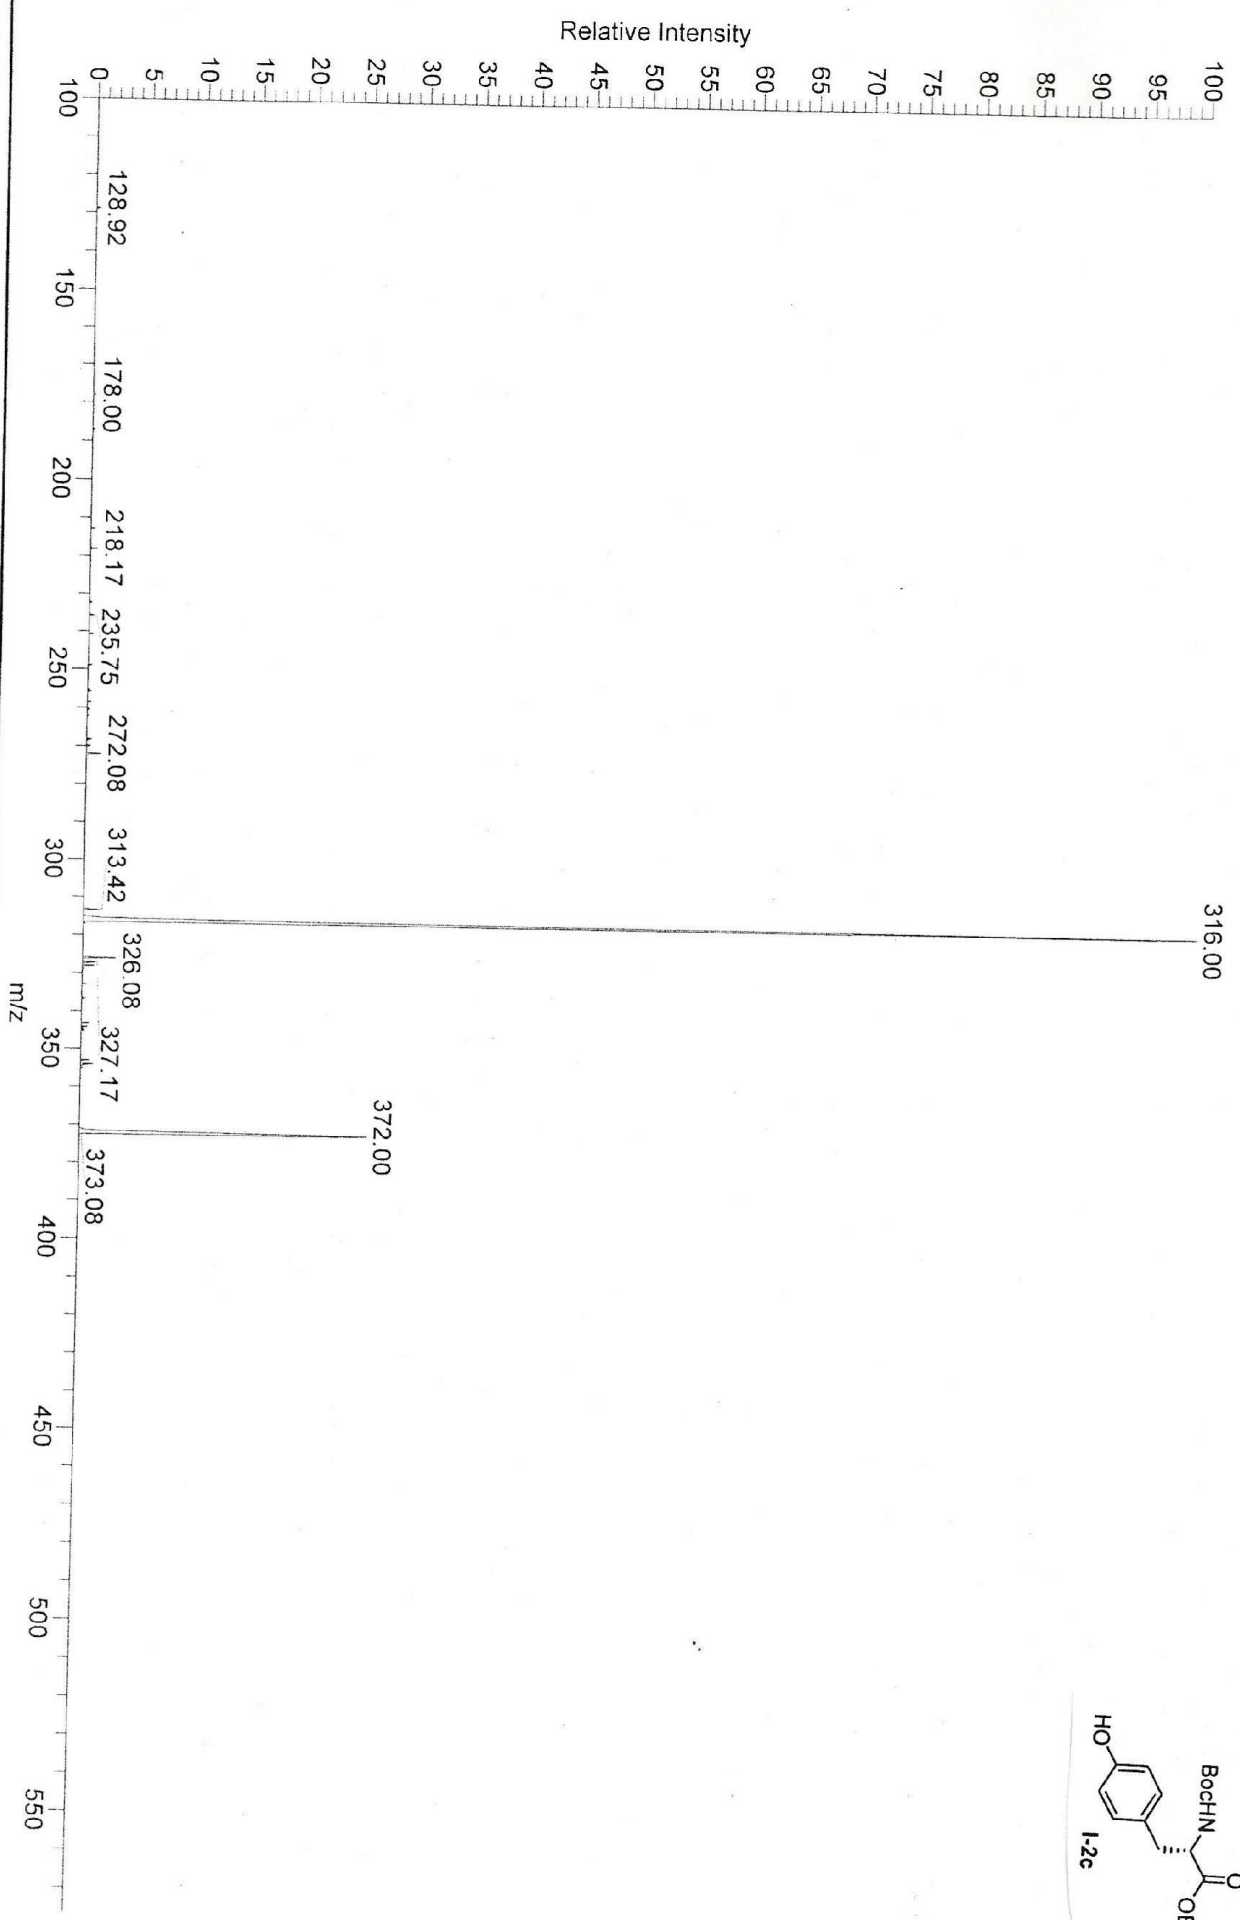

LTO Tune rev. LCO Fleet 2.6.0 SP3

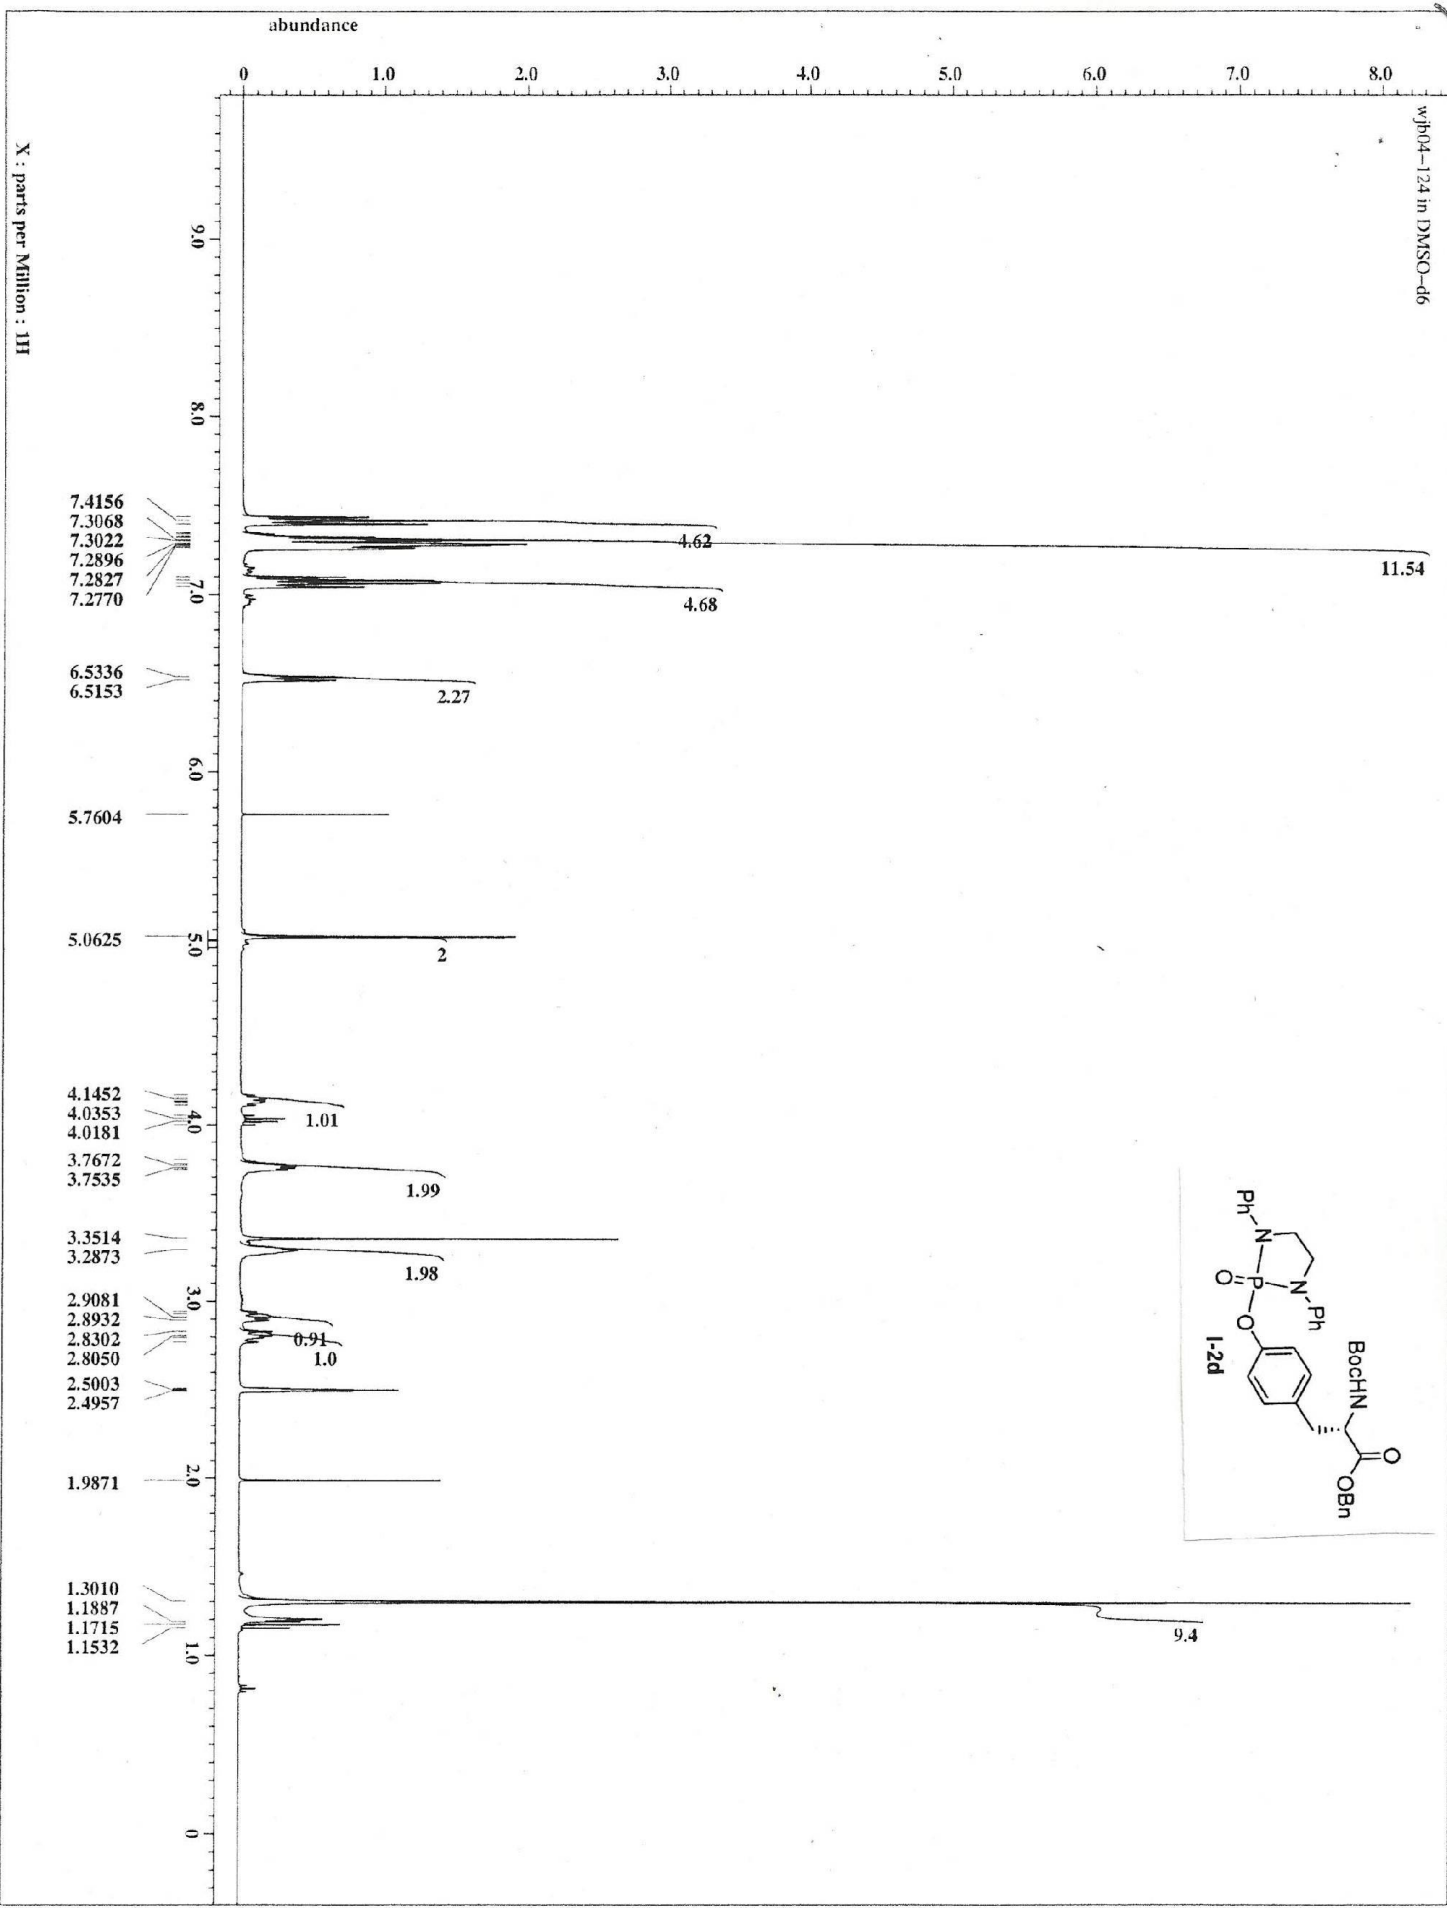

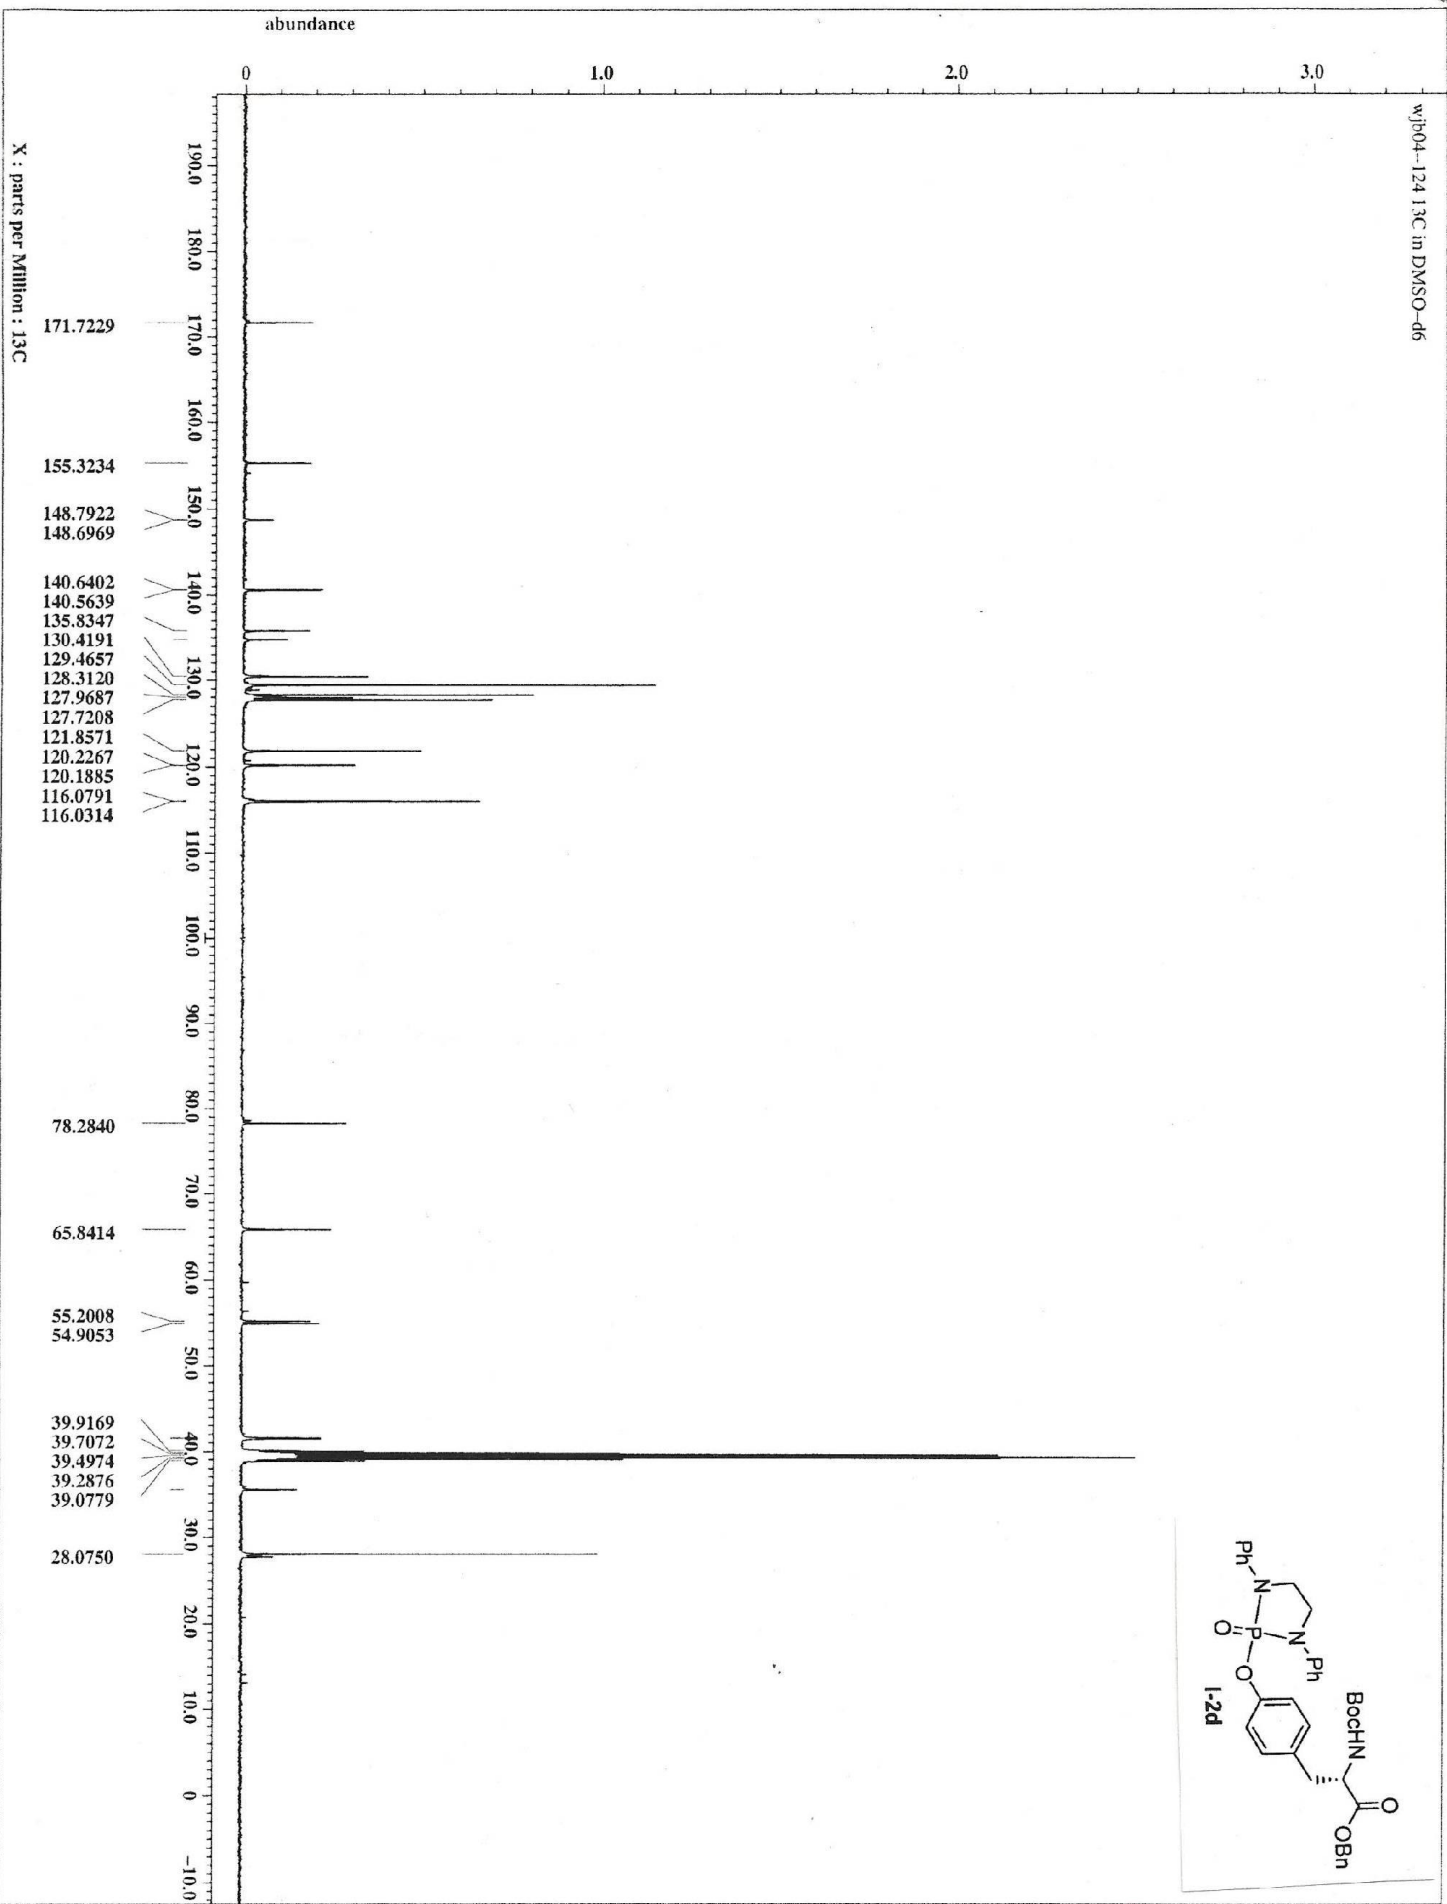

wj604-124 3p in DMSO-d<sub>6</sub>

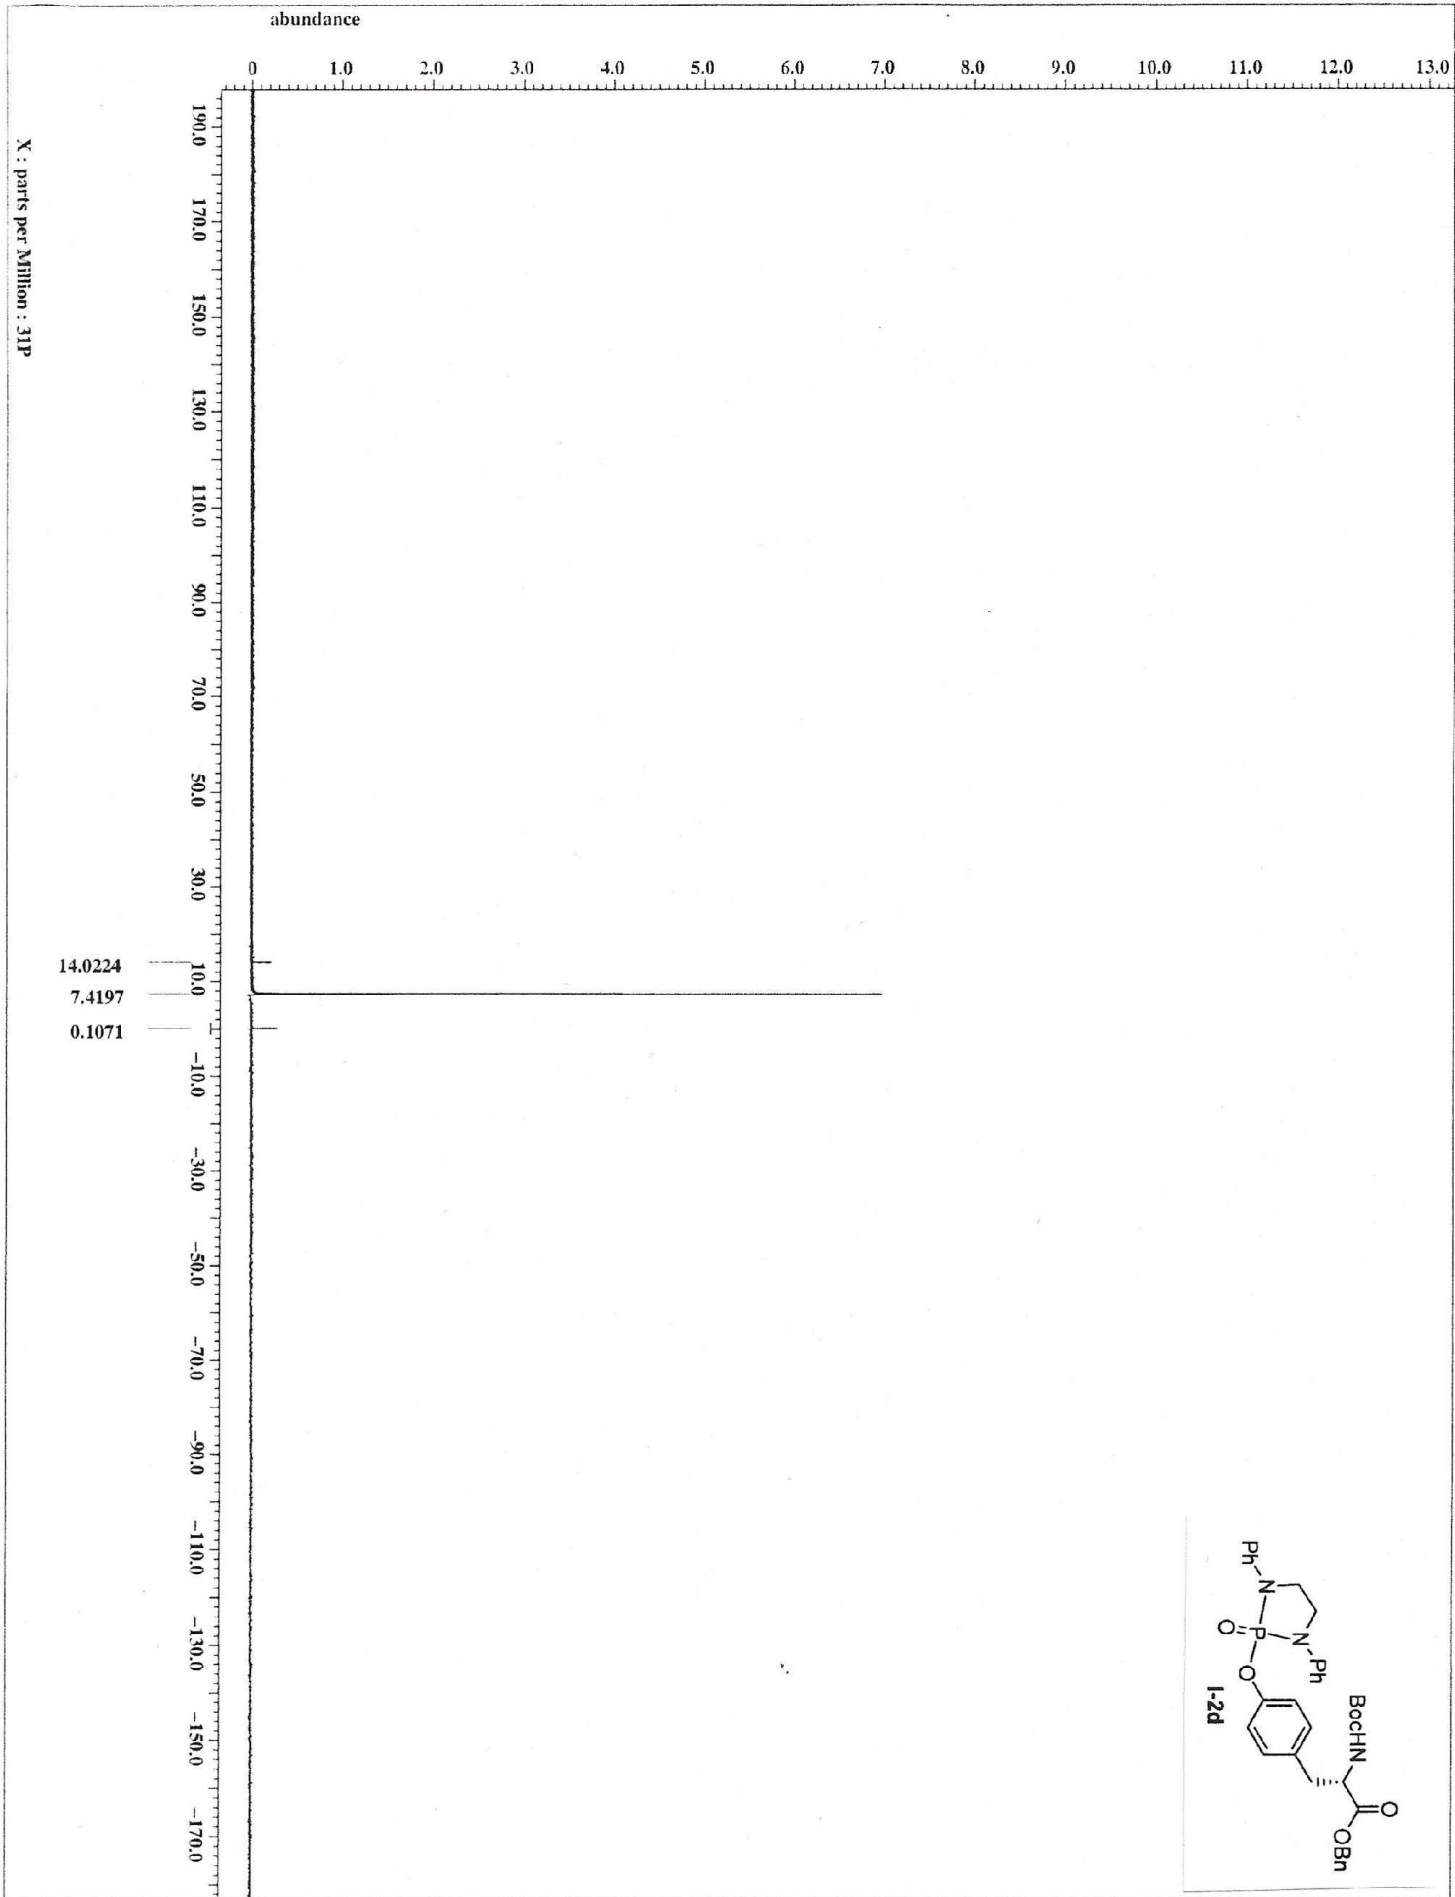



W04-124\_12042012\_01 #131 RT: 1.36 AV: 1 NL: 2.78E6  
T: FTMS + p ESI Full ms [150.00-2000.00]

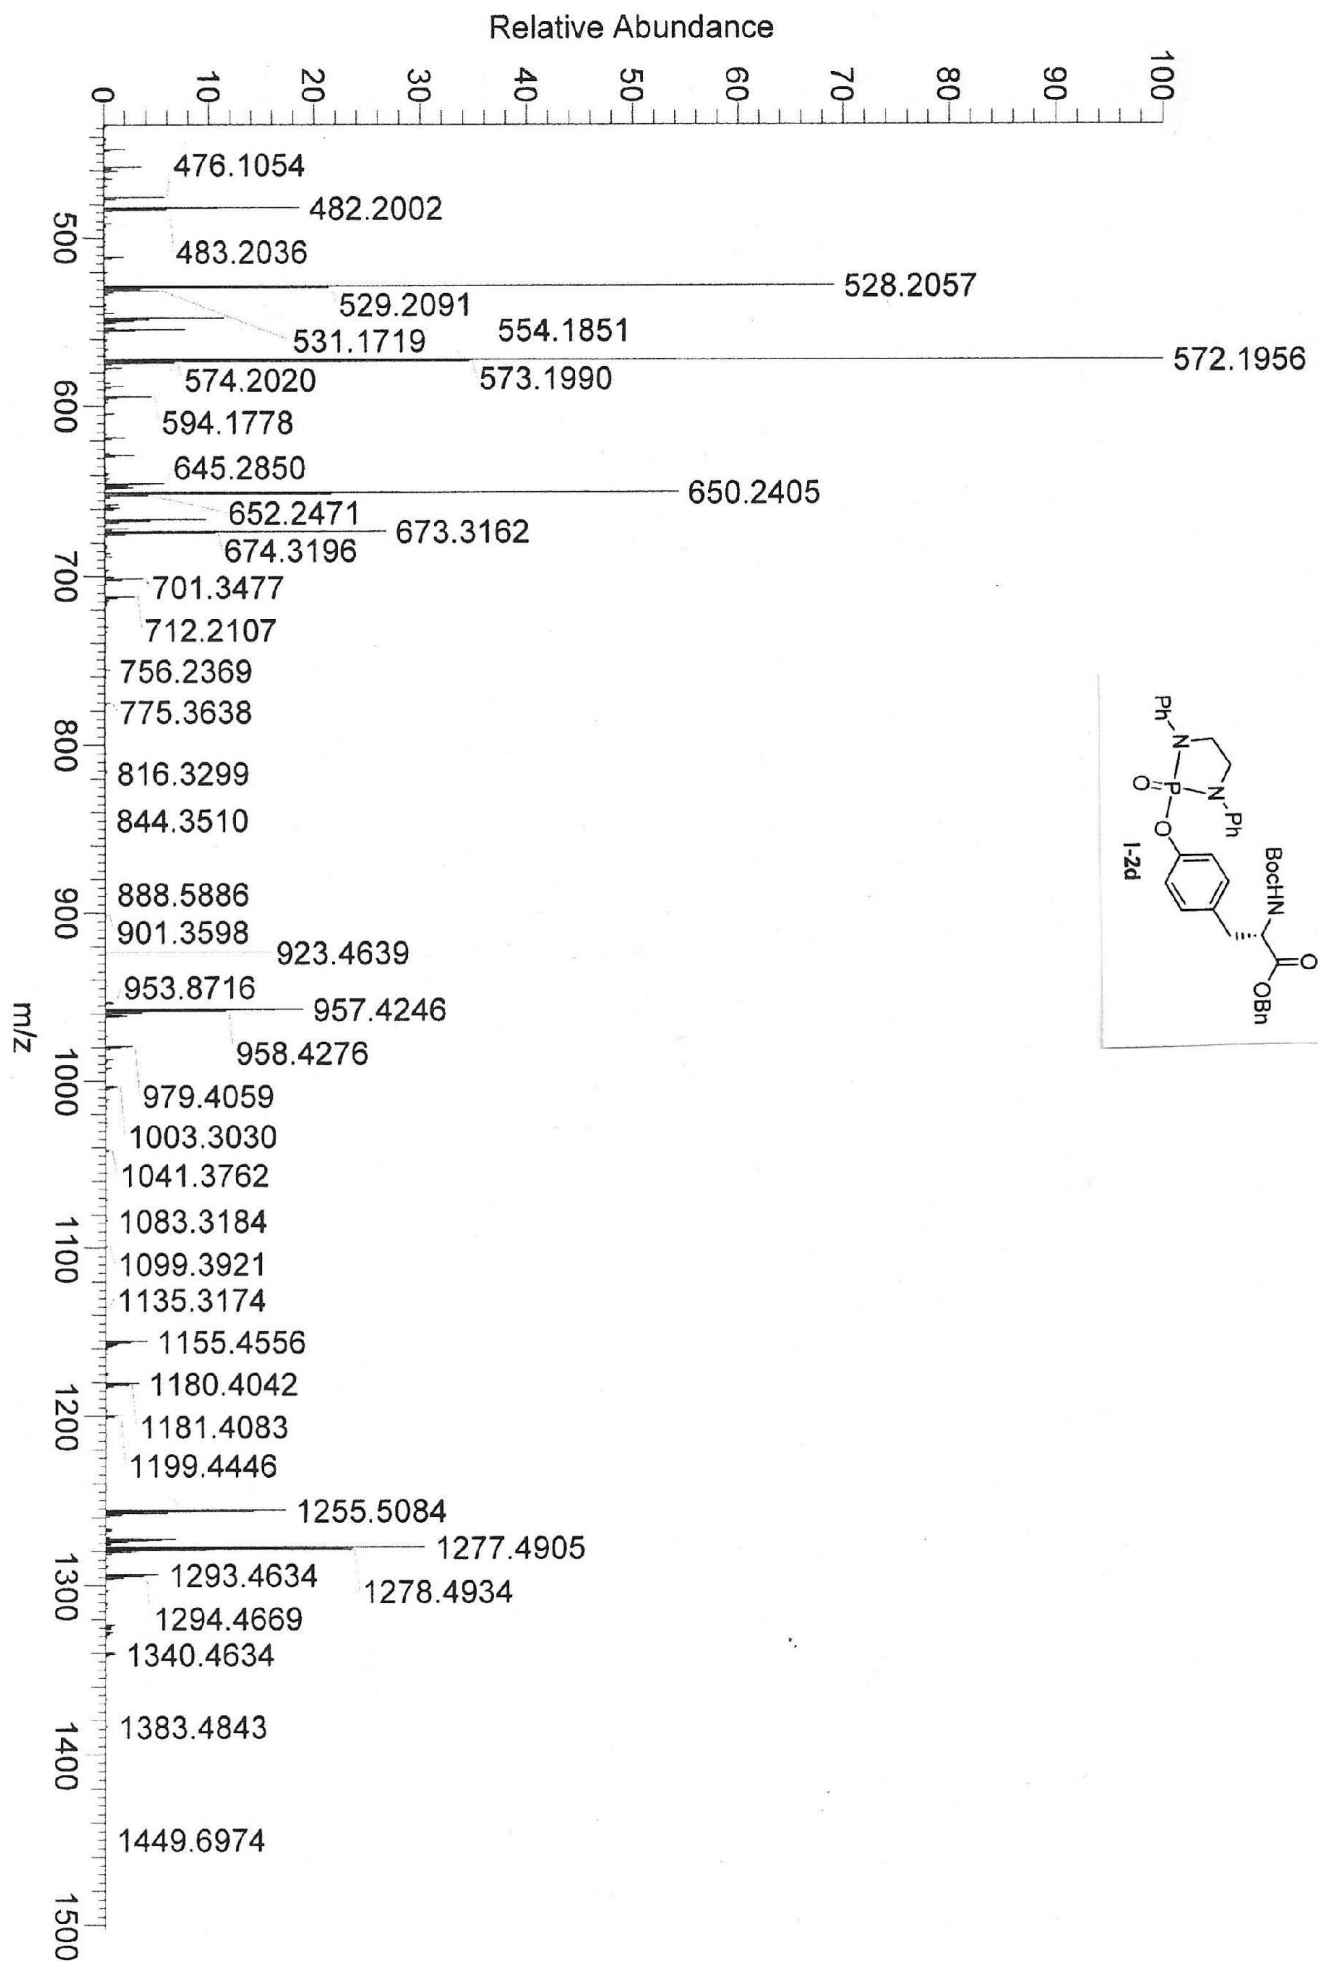

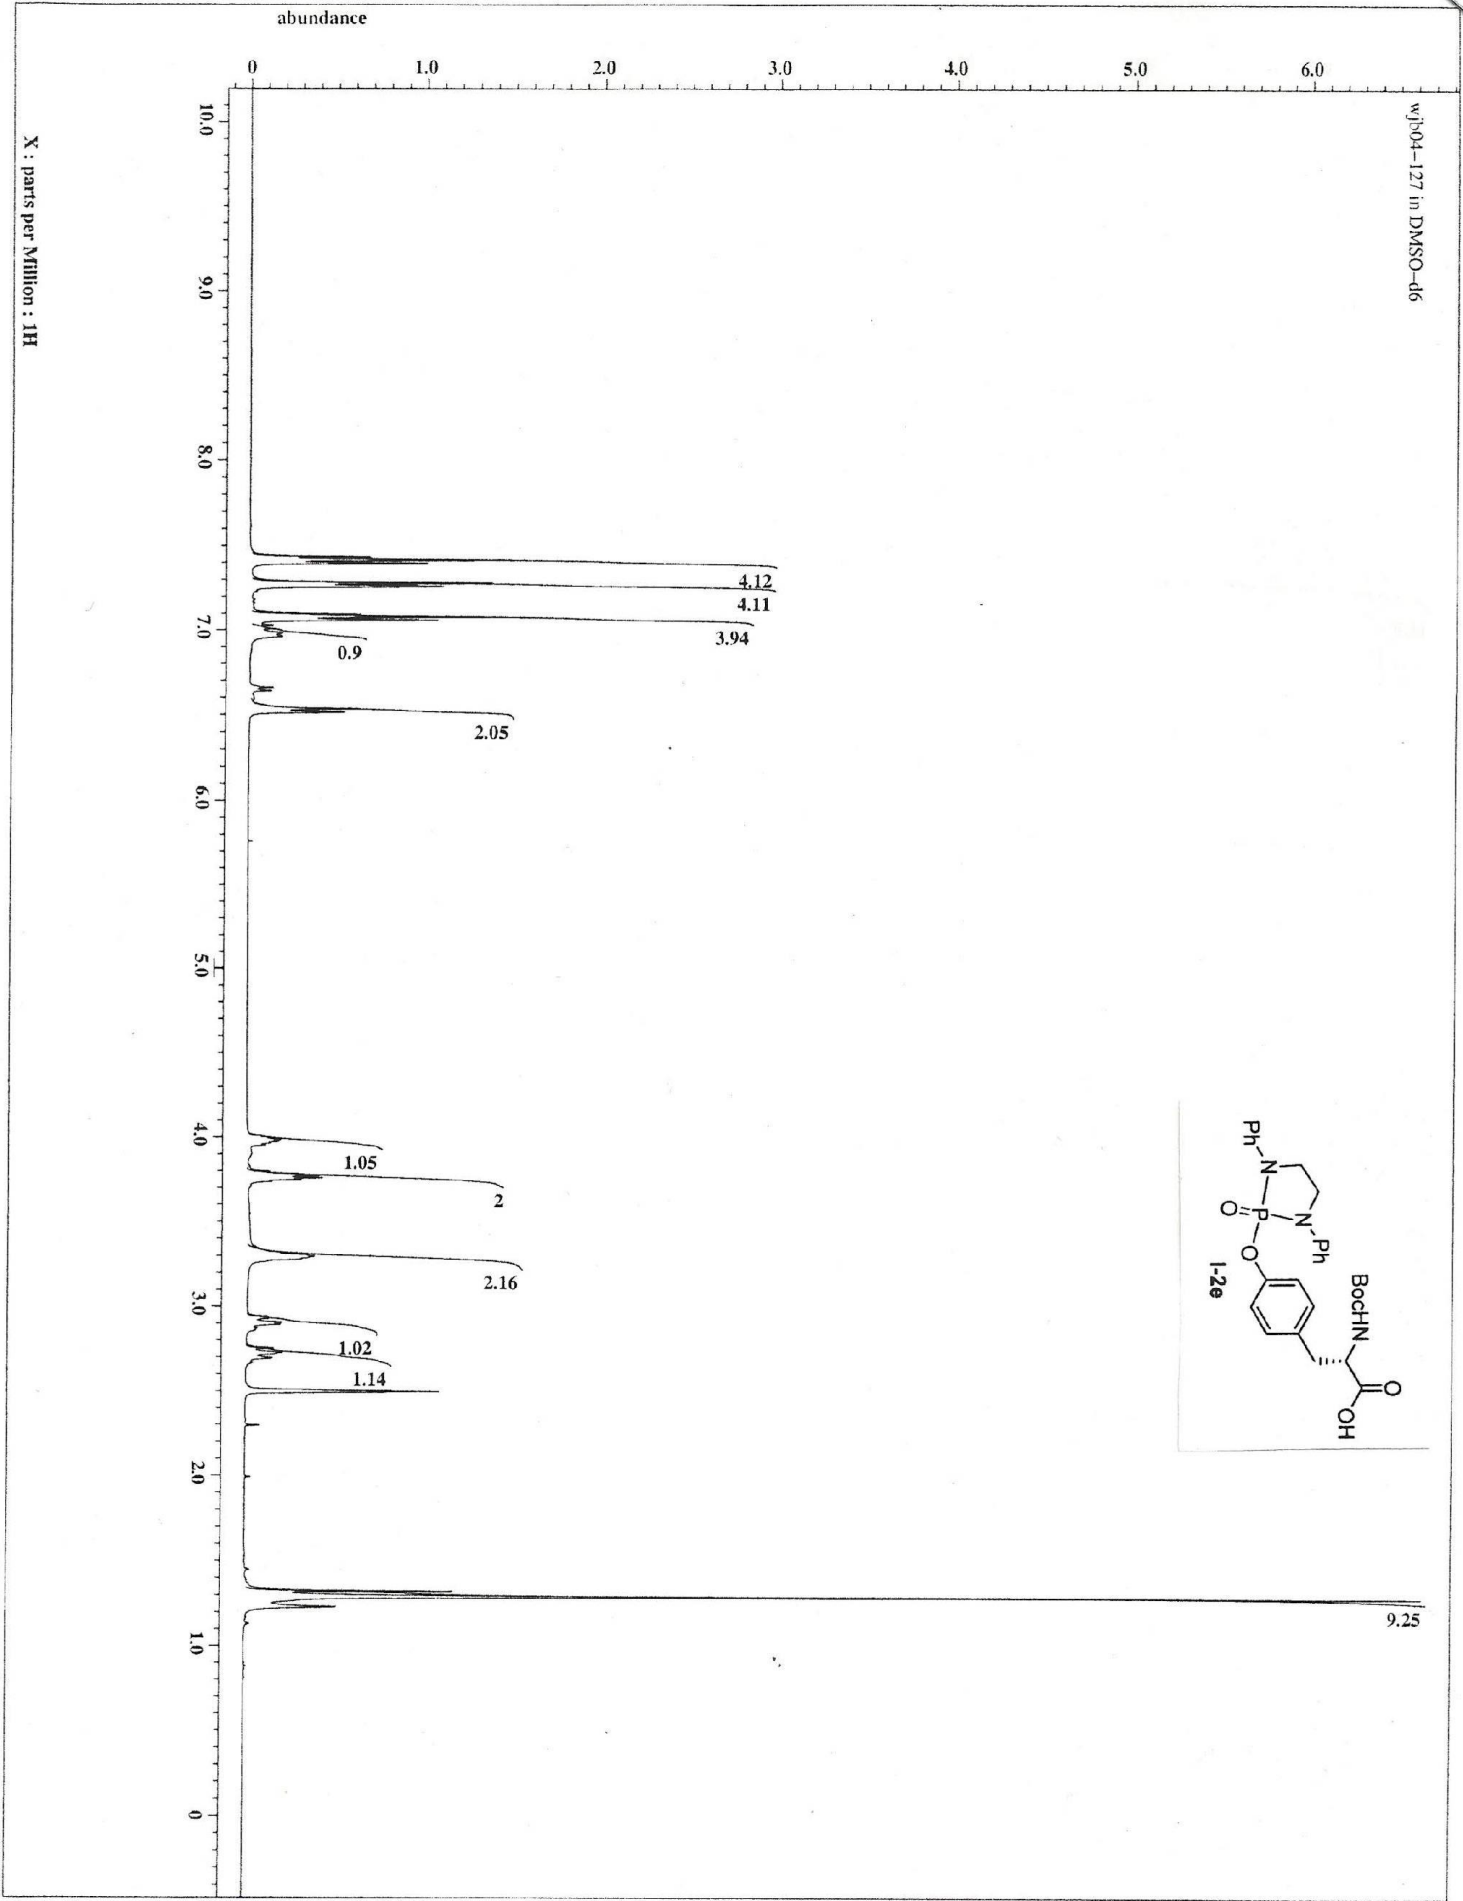



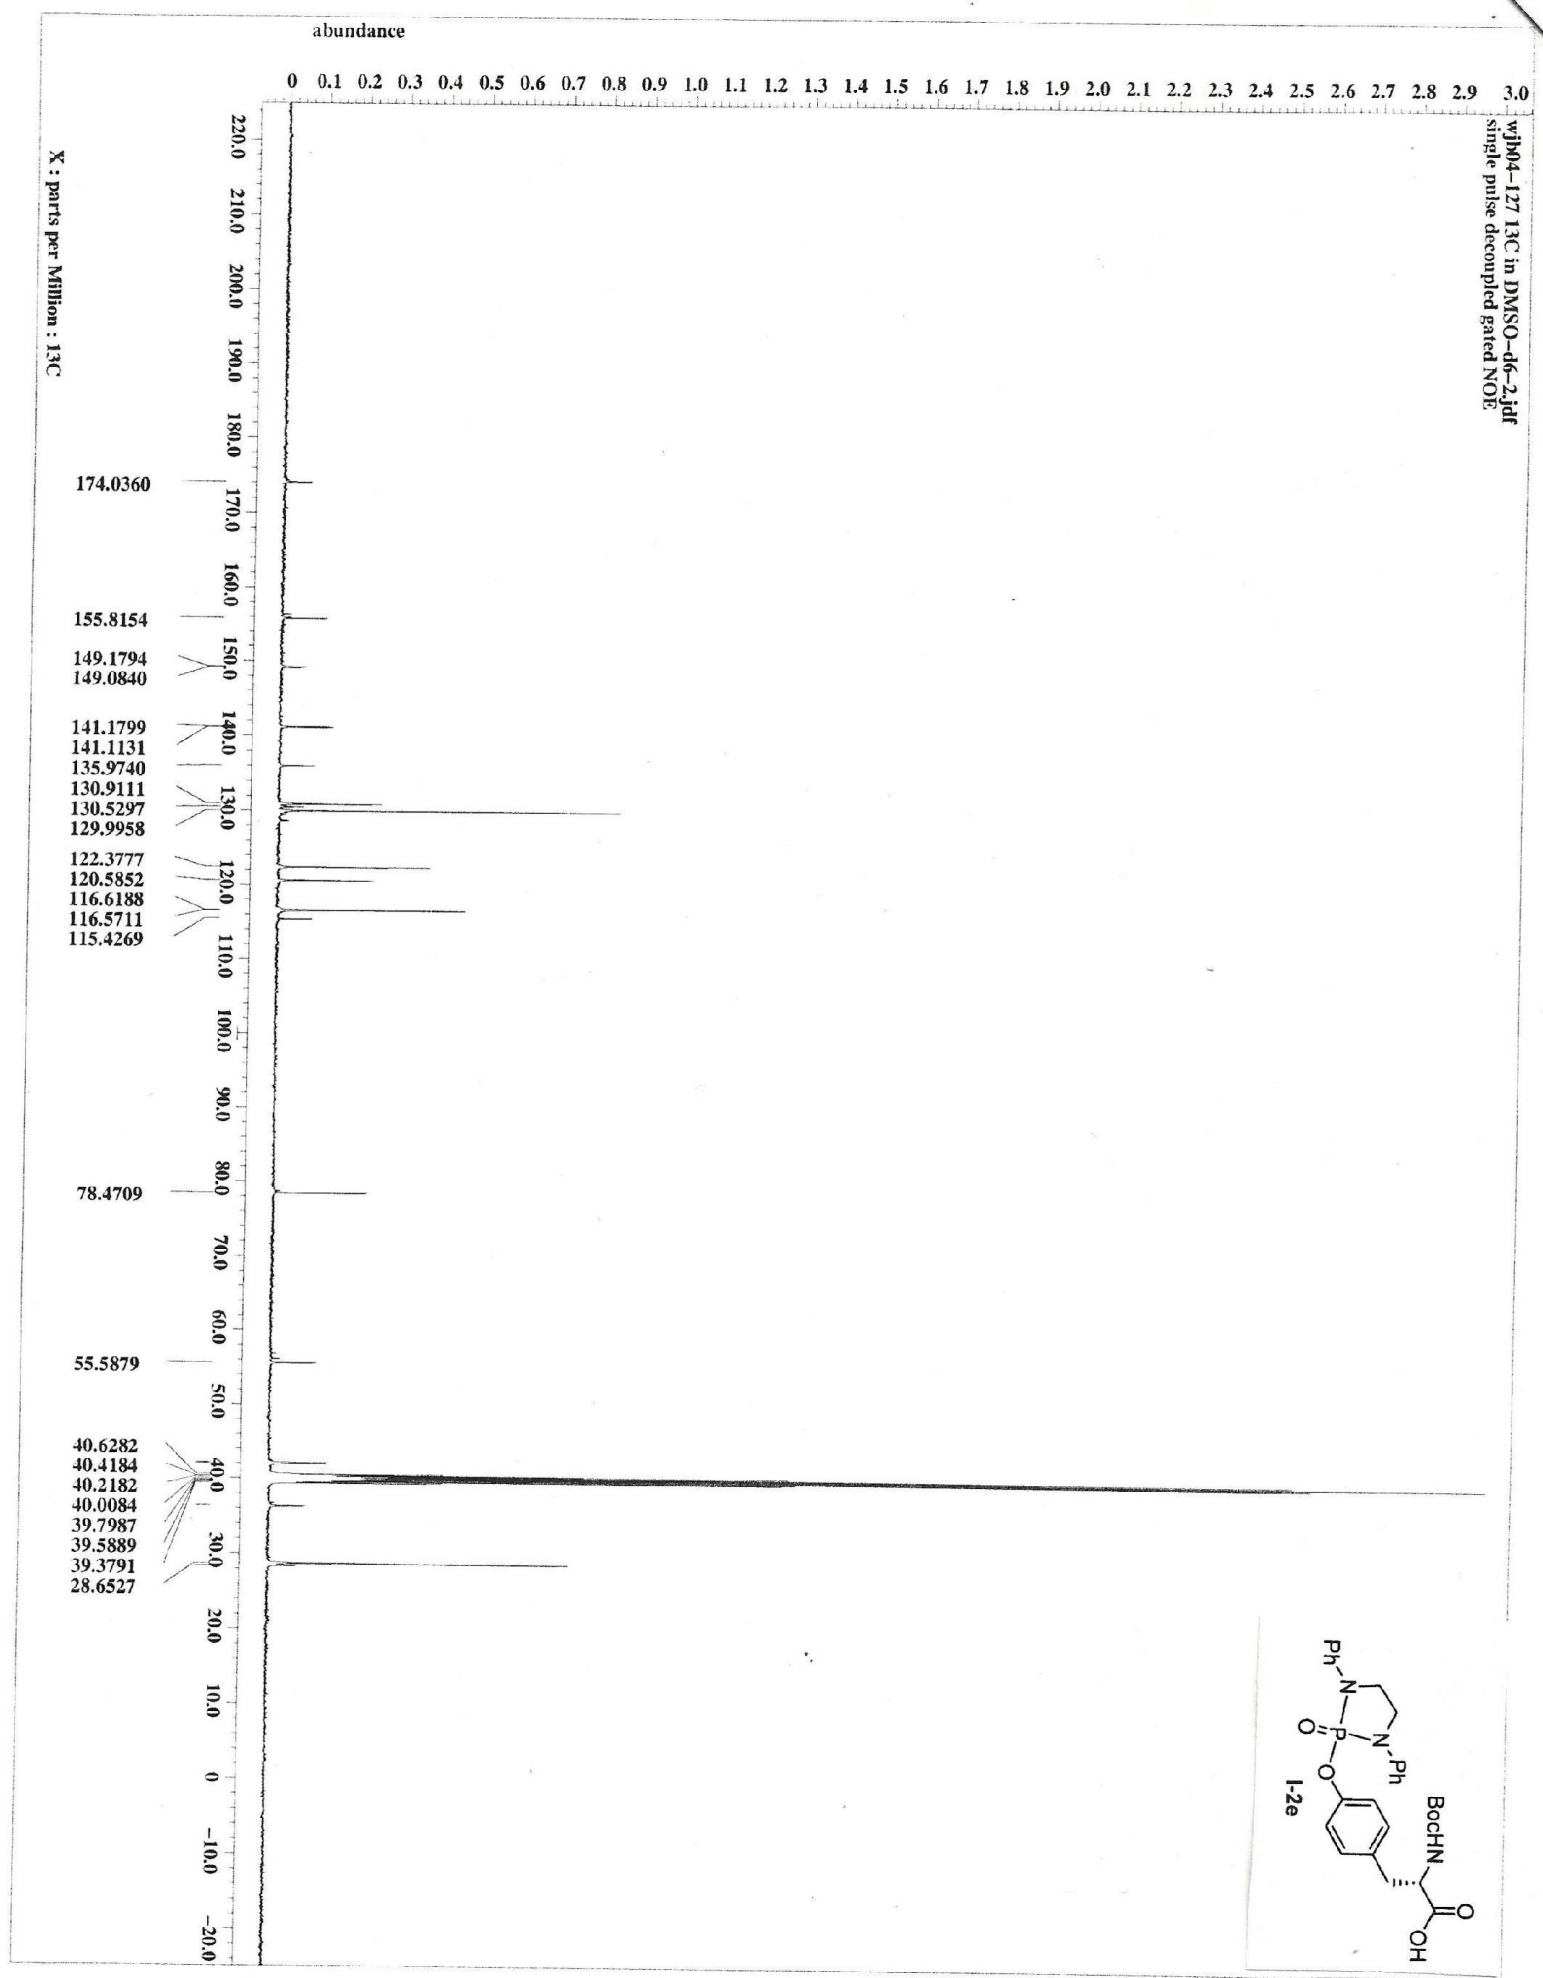

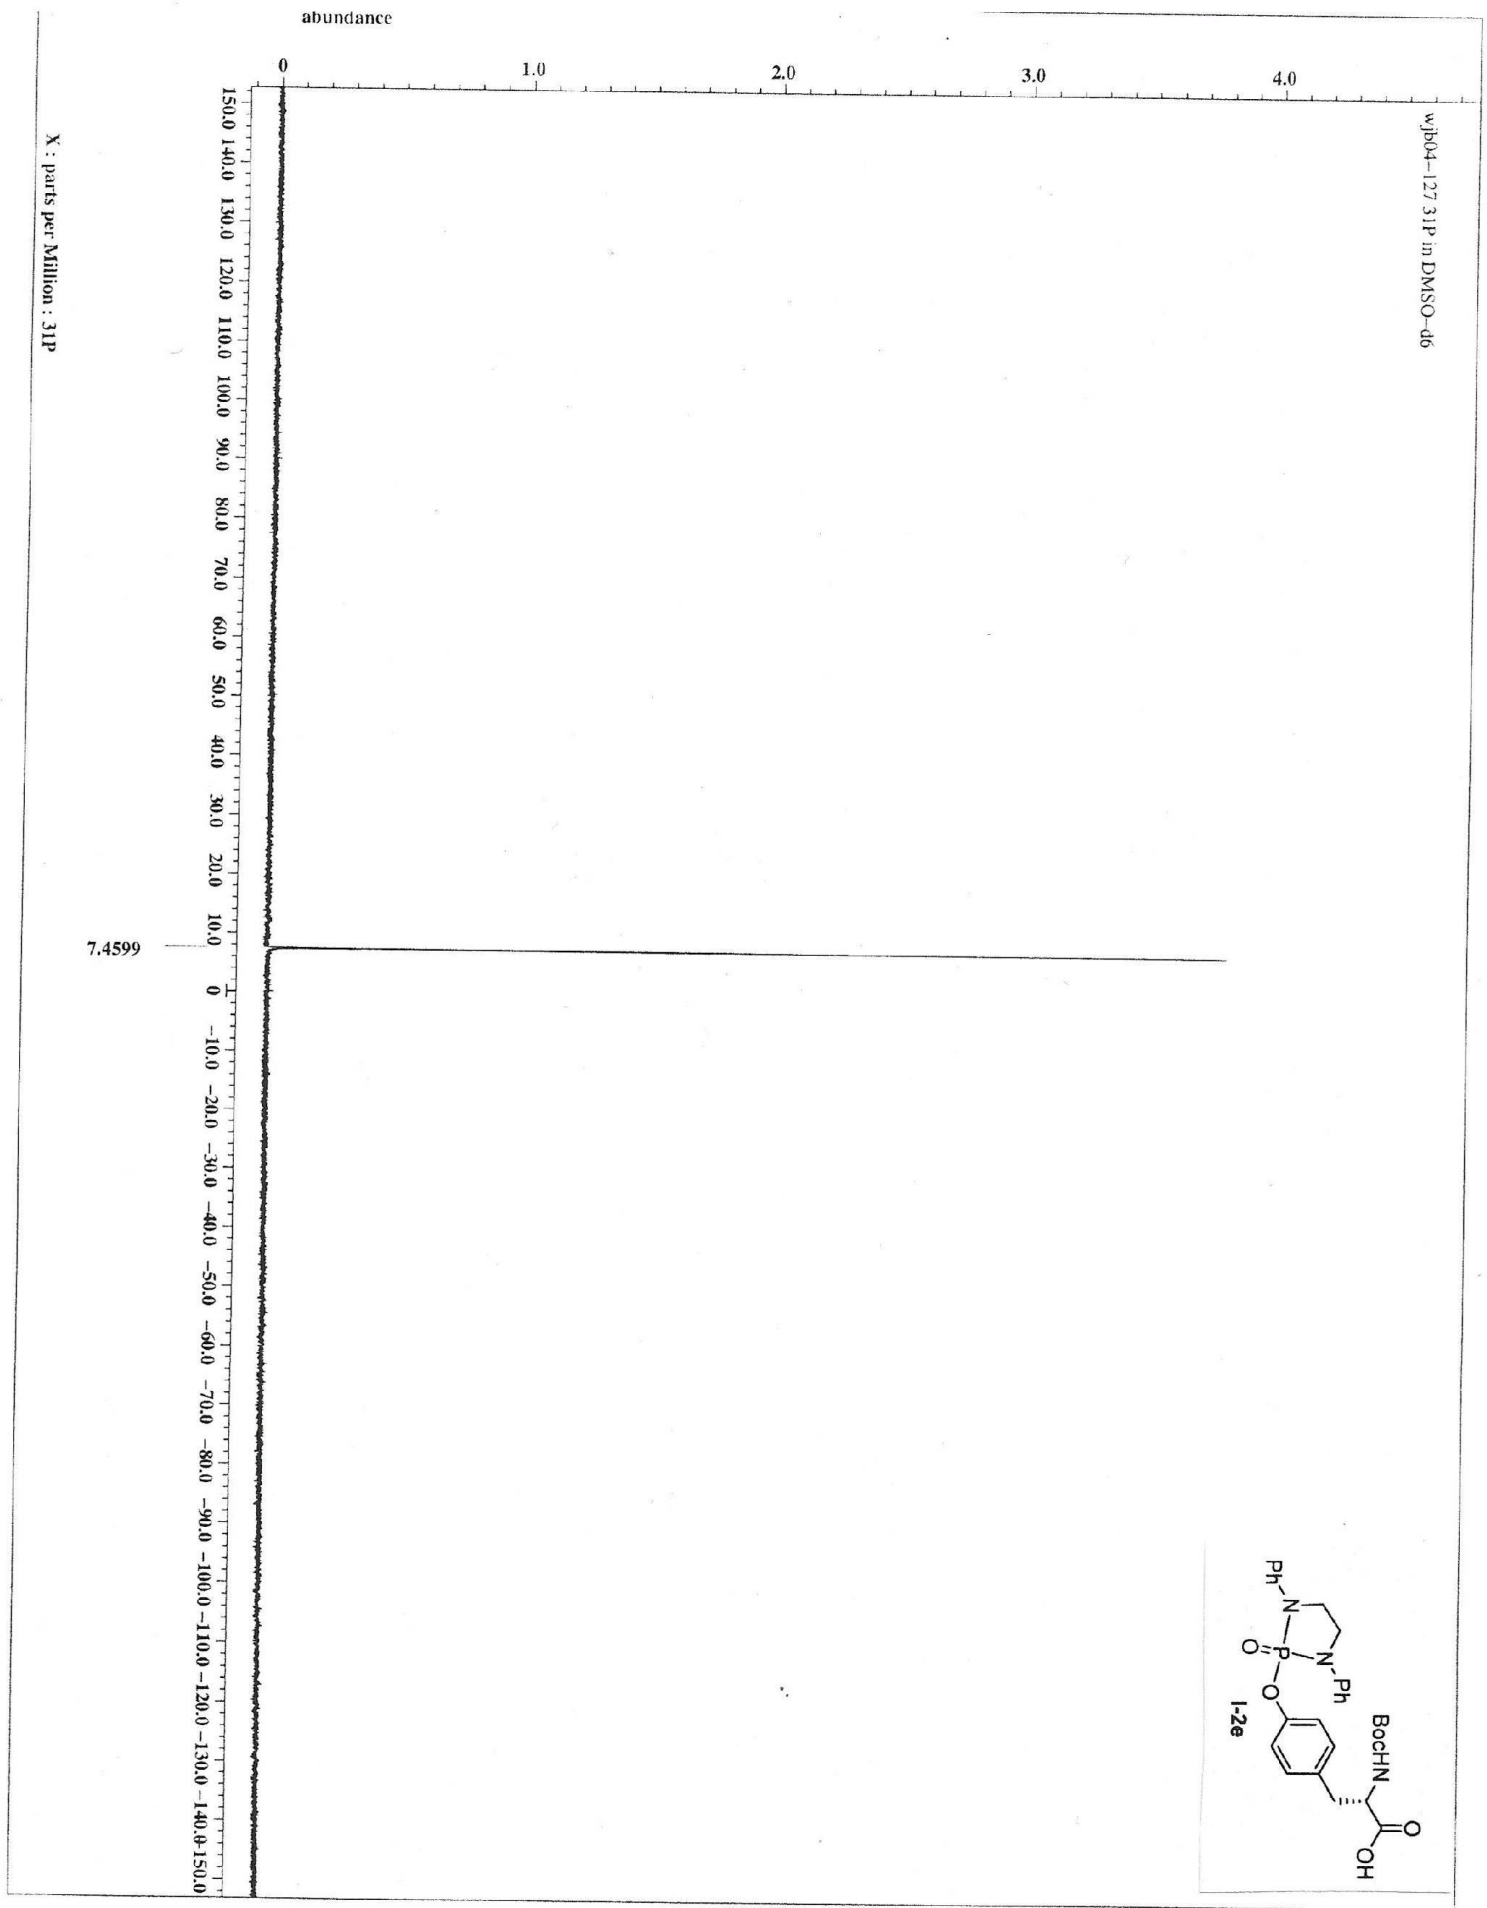

W04-127\_12042012\_01 #1 RT: 0.00 AV: 1 NL: 1.14E6  
T: FTMS + p ESI Full ms [150.00-2000.00]

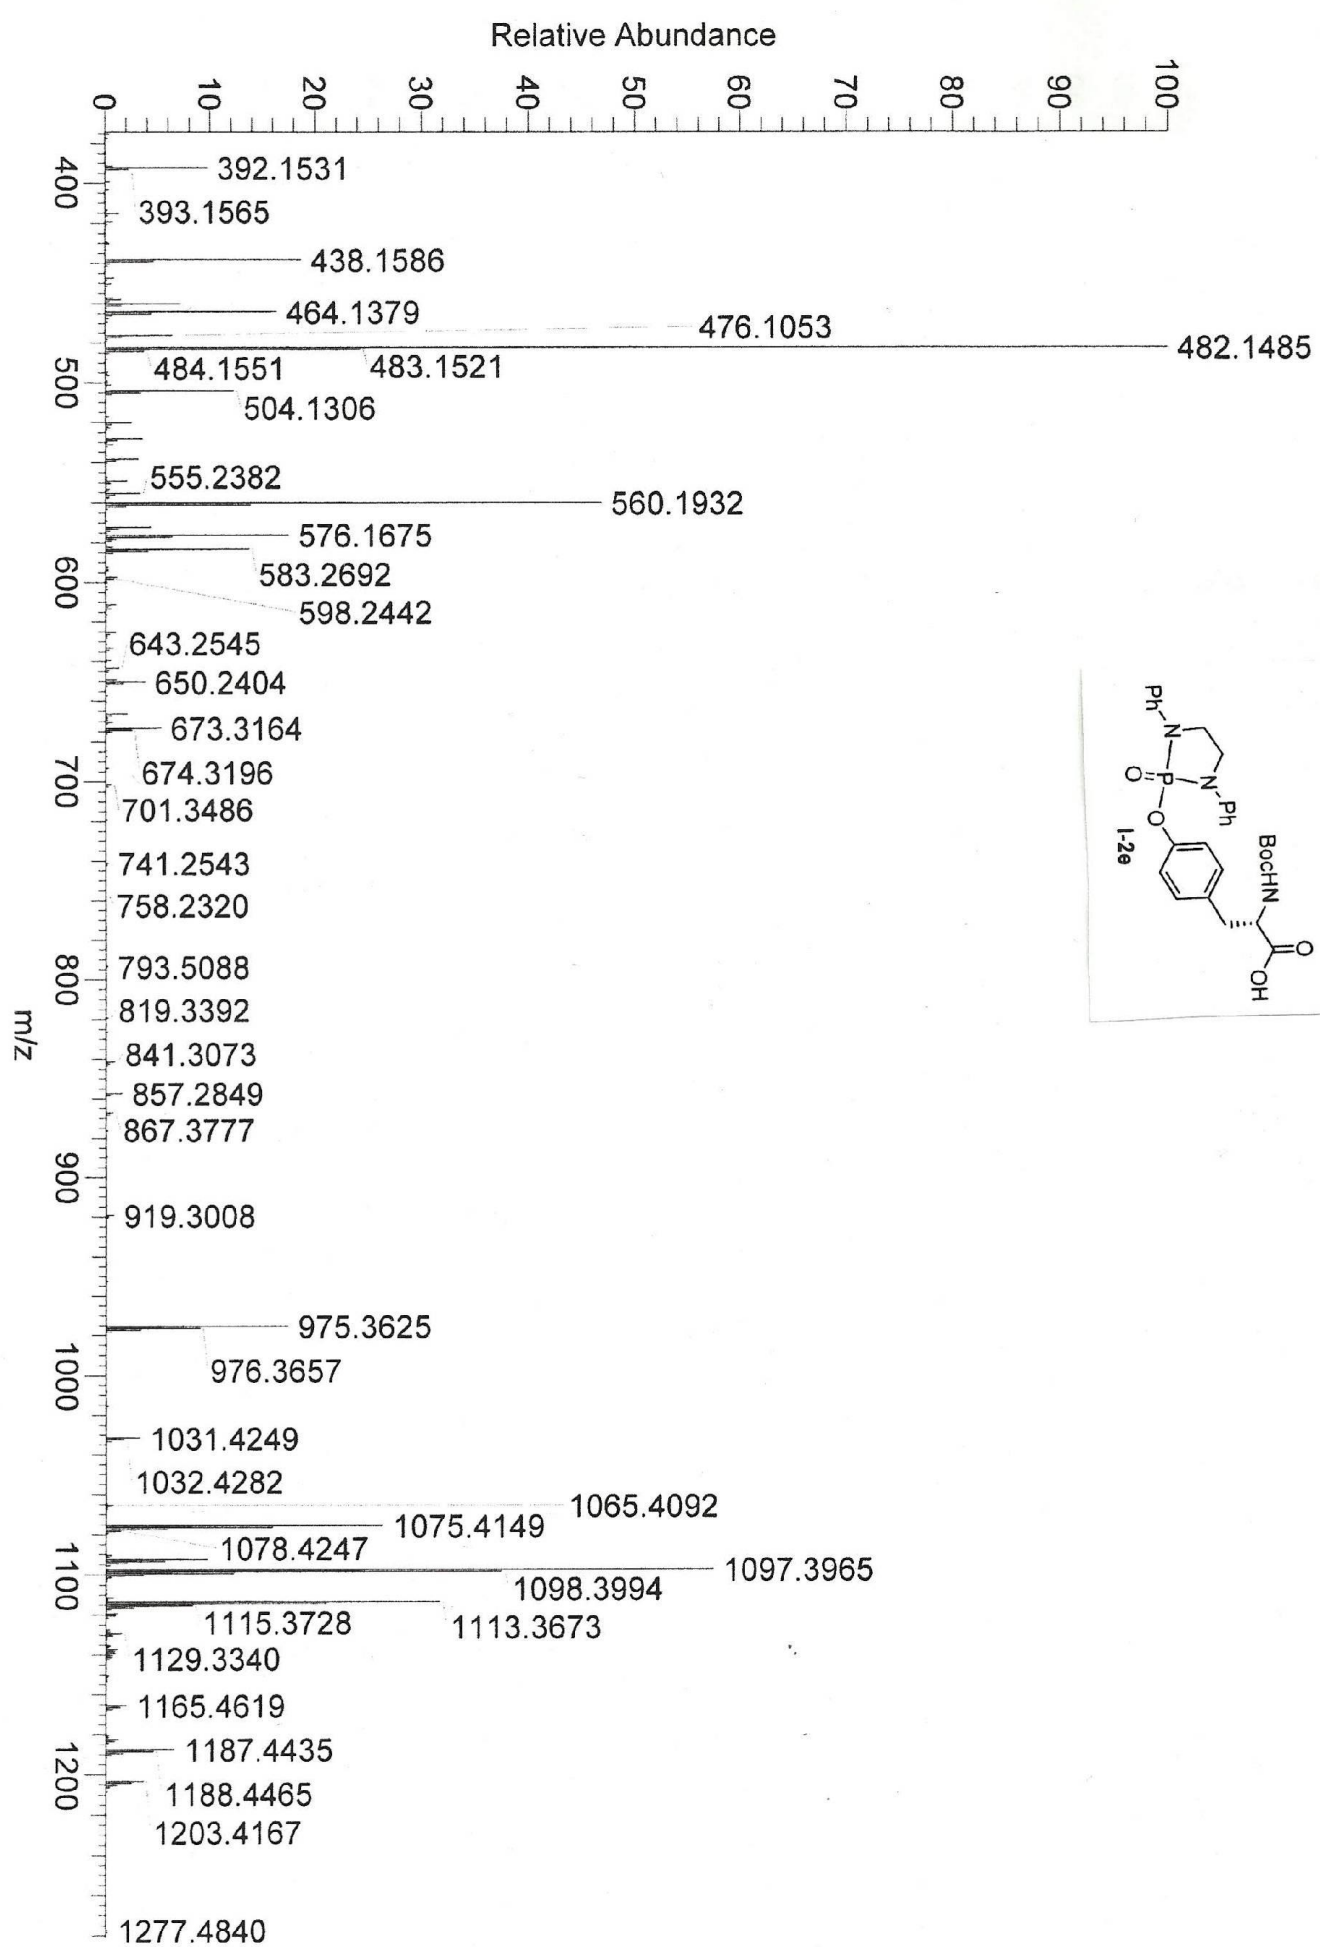

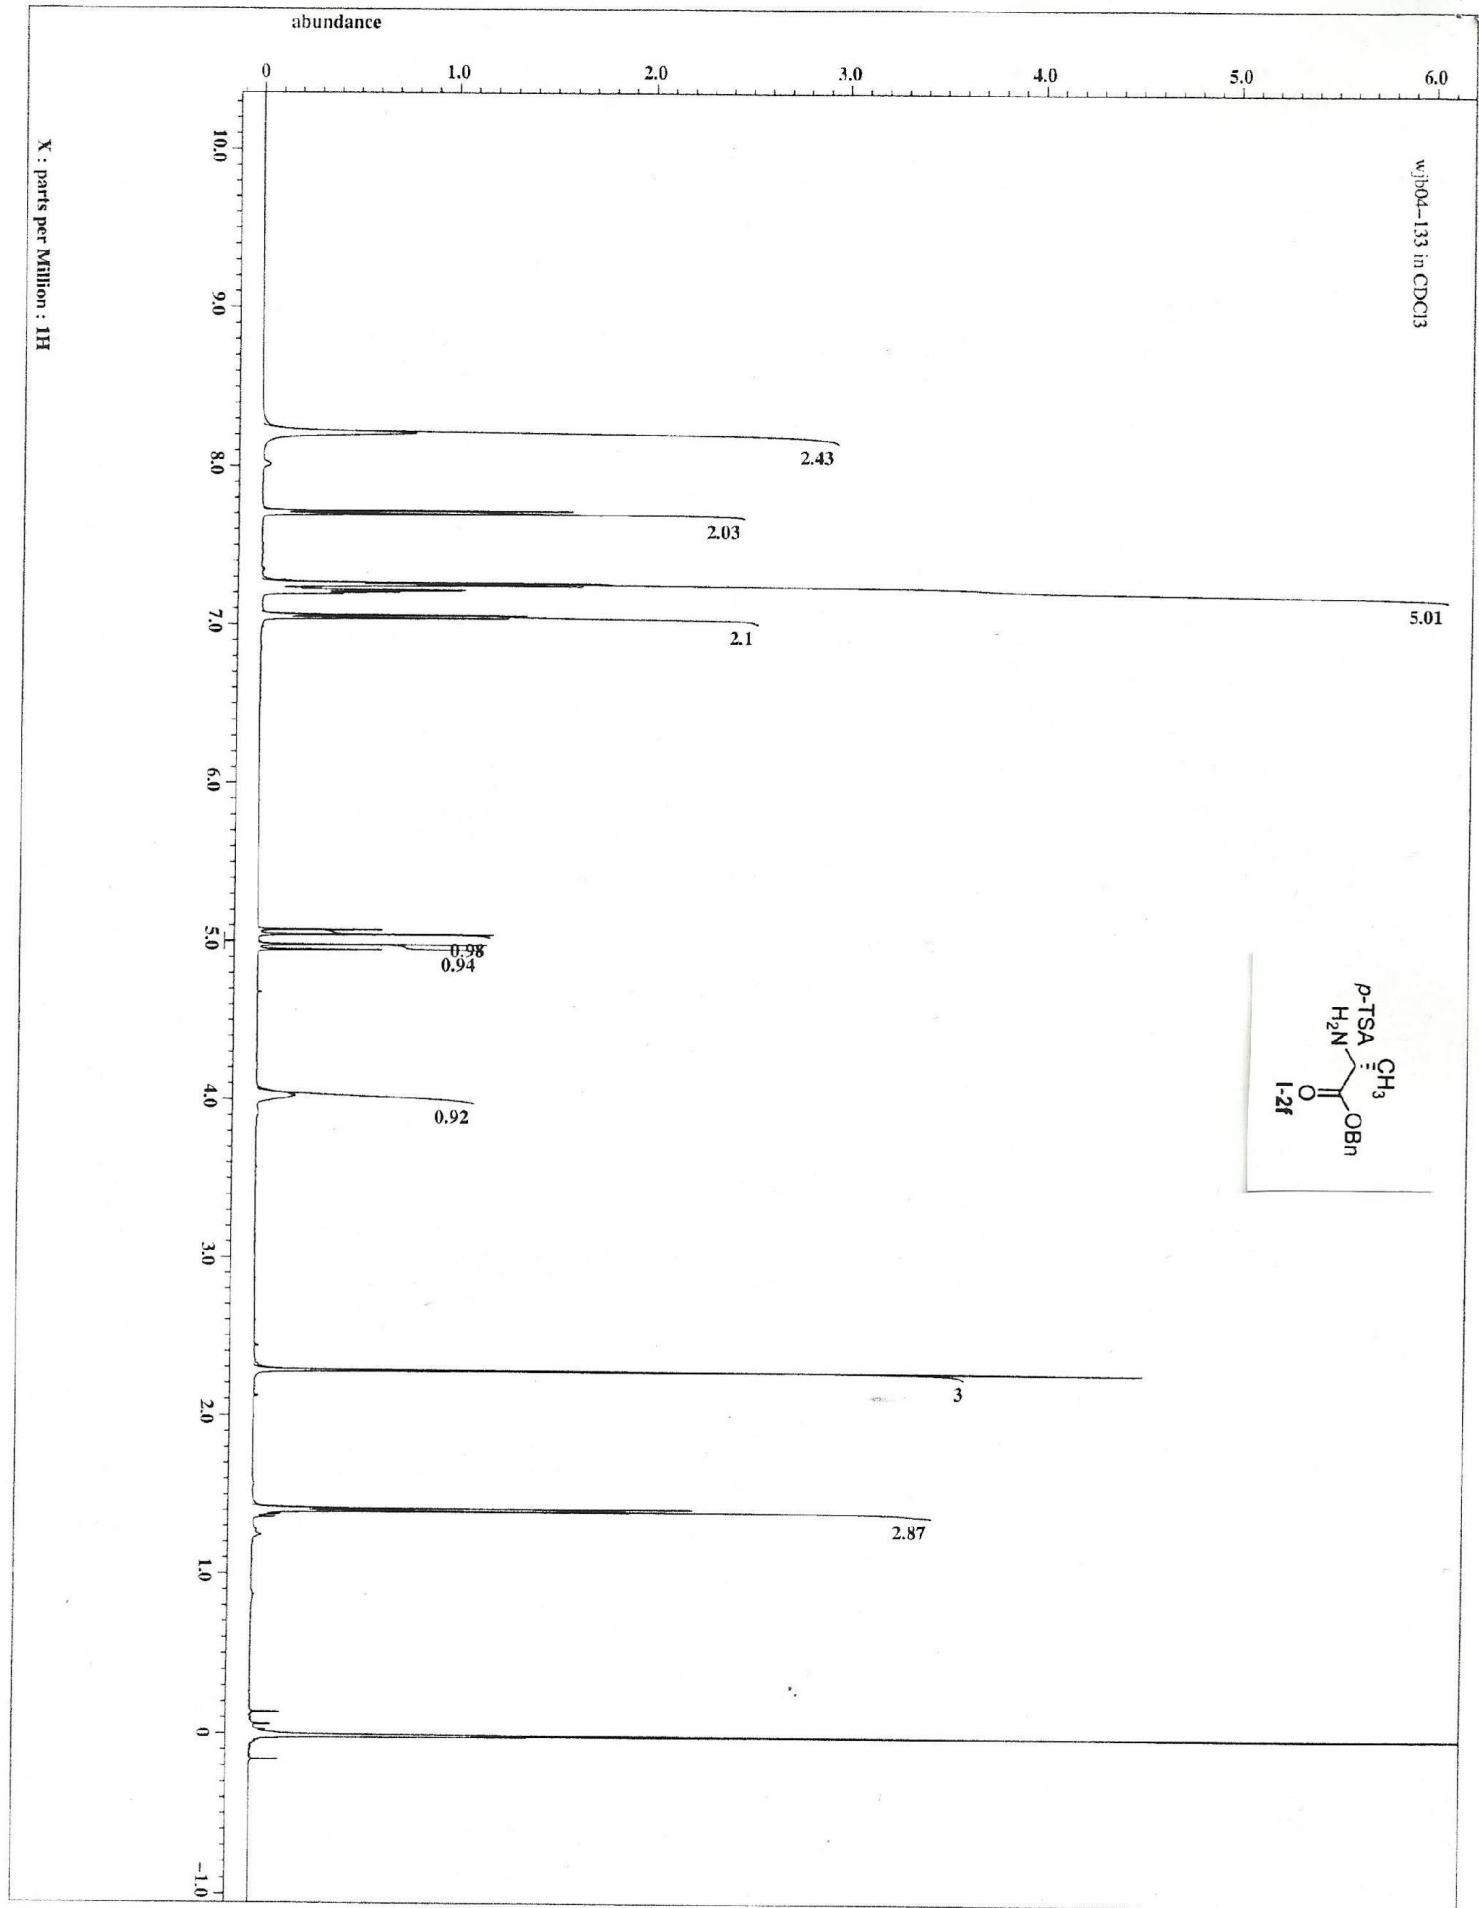

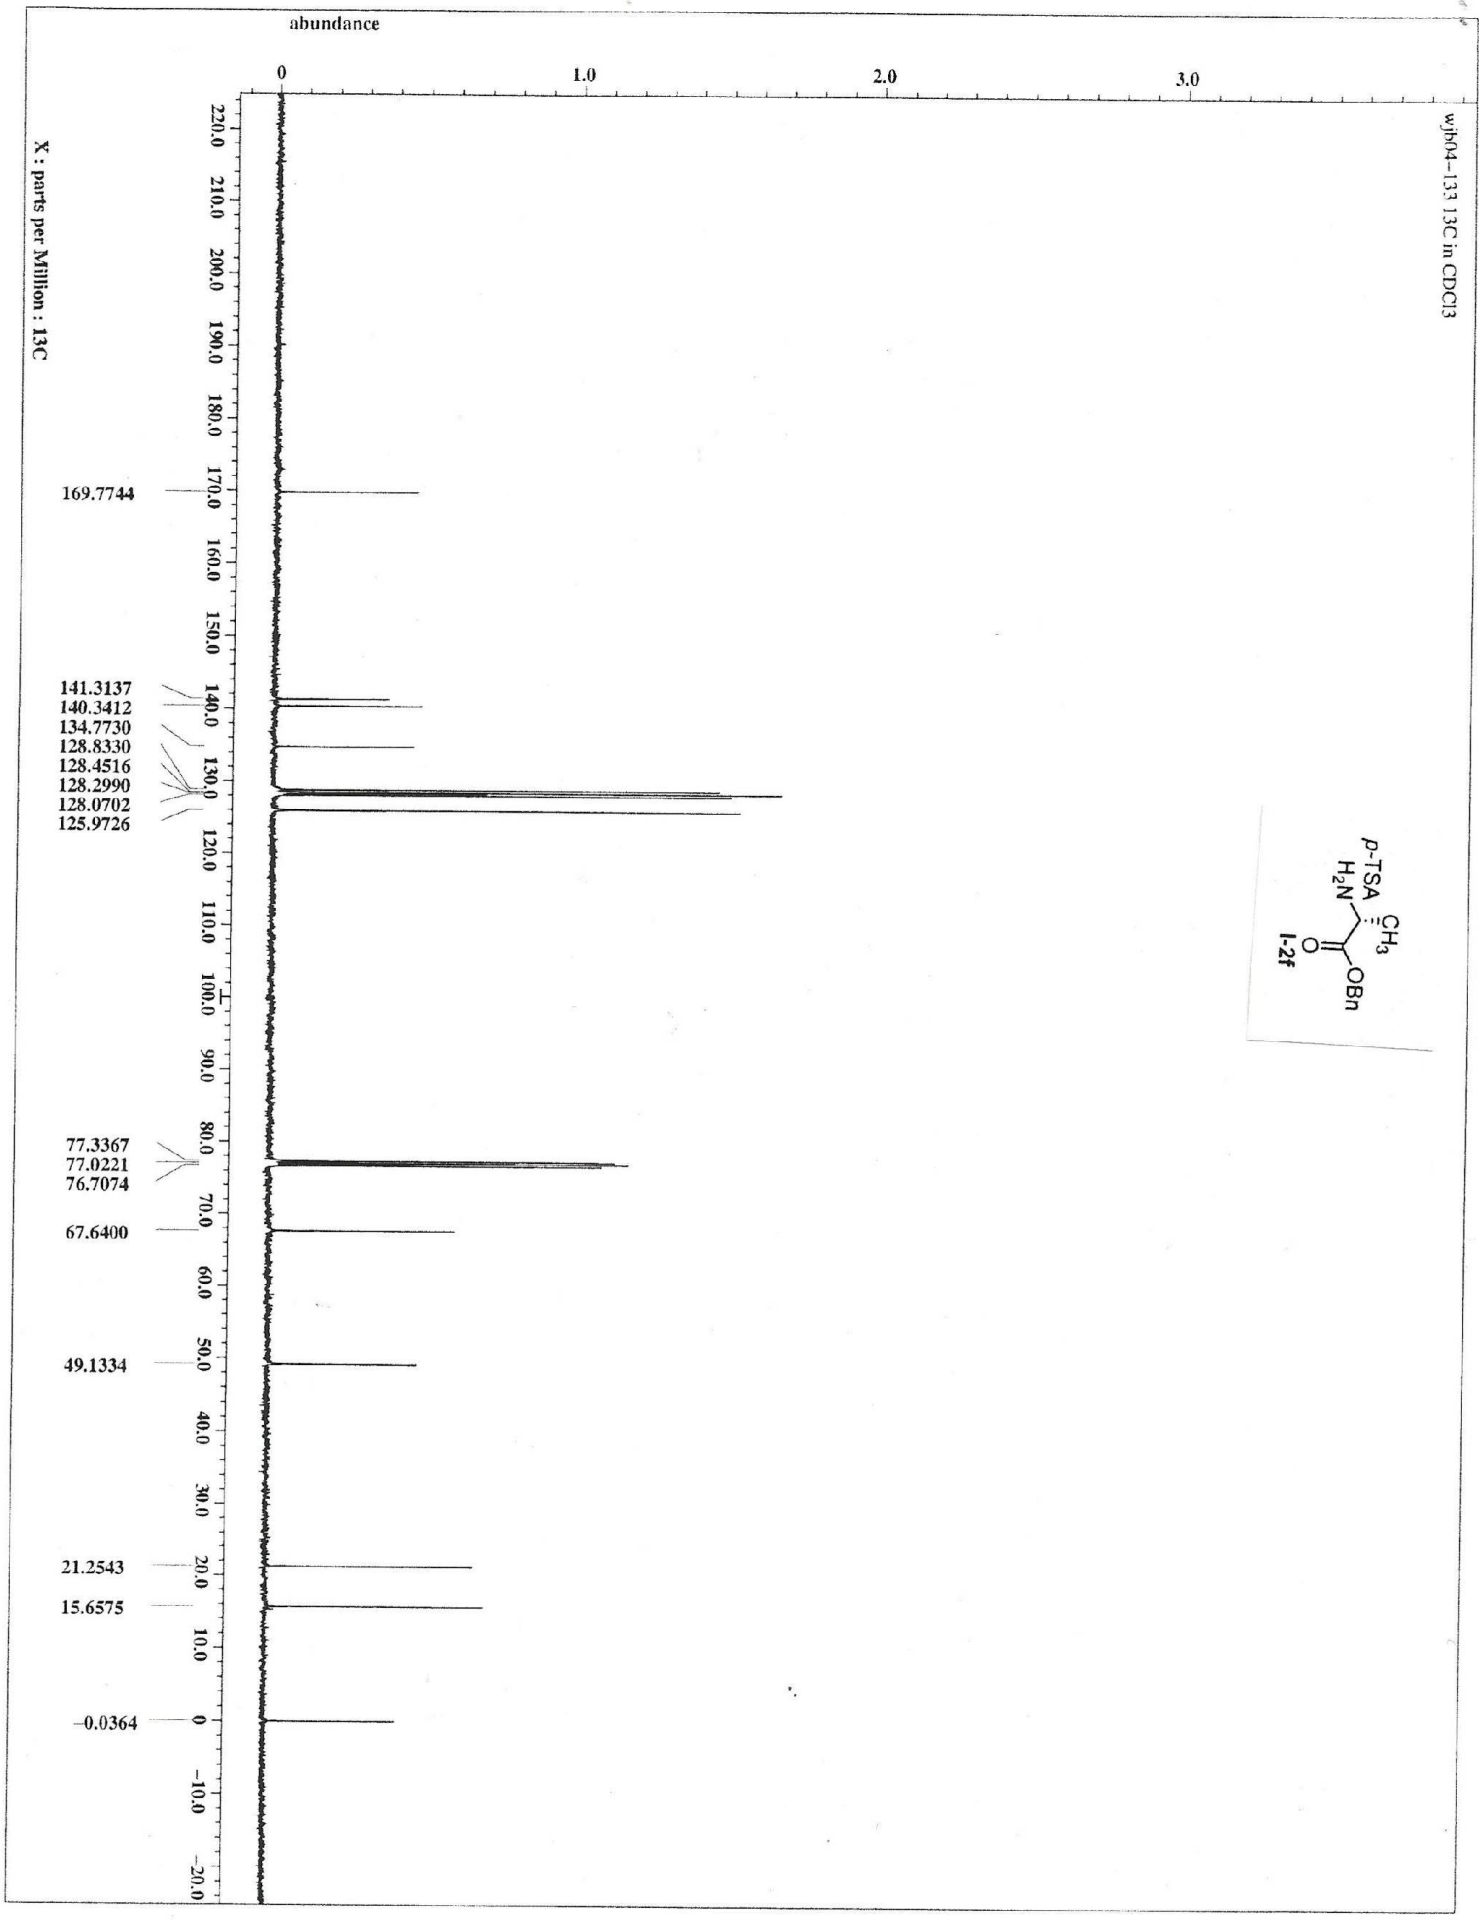

#373 RT: 2.714 AV: 9 IT: 82.943 ST: 1.02 US: 4 NL: 3.33E3  
F: ITMS + p ESI Full ms2 180.00@cid0.00 [50.00-300.00]

WJBO4-133

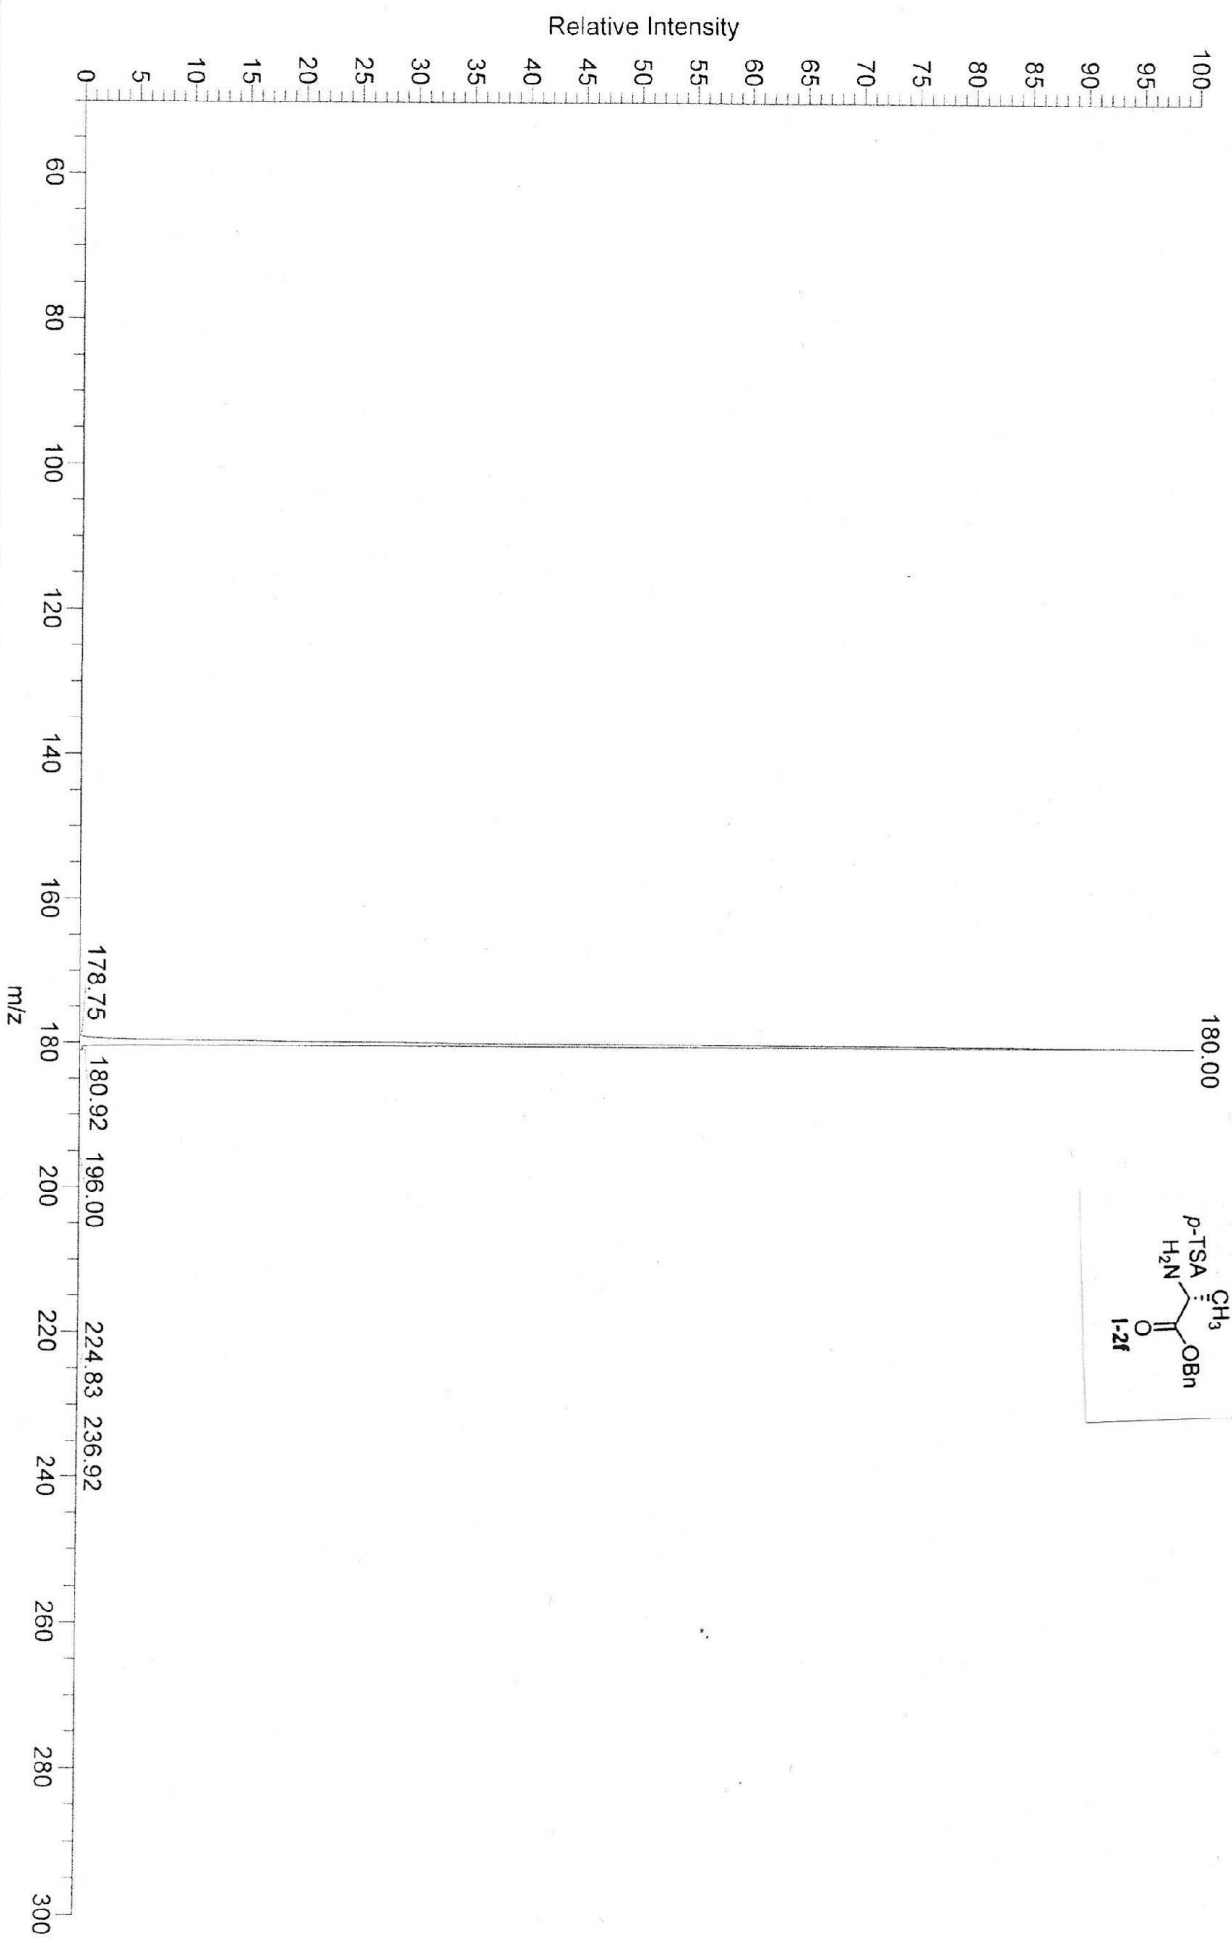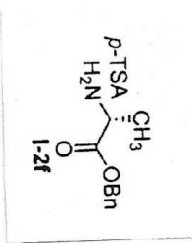



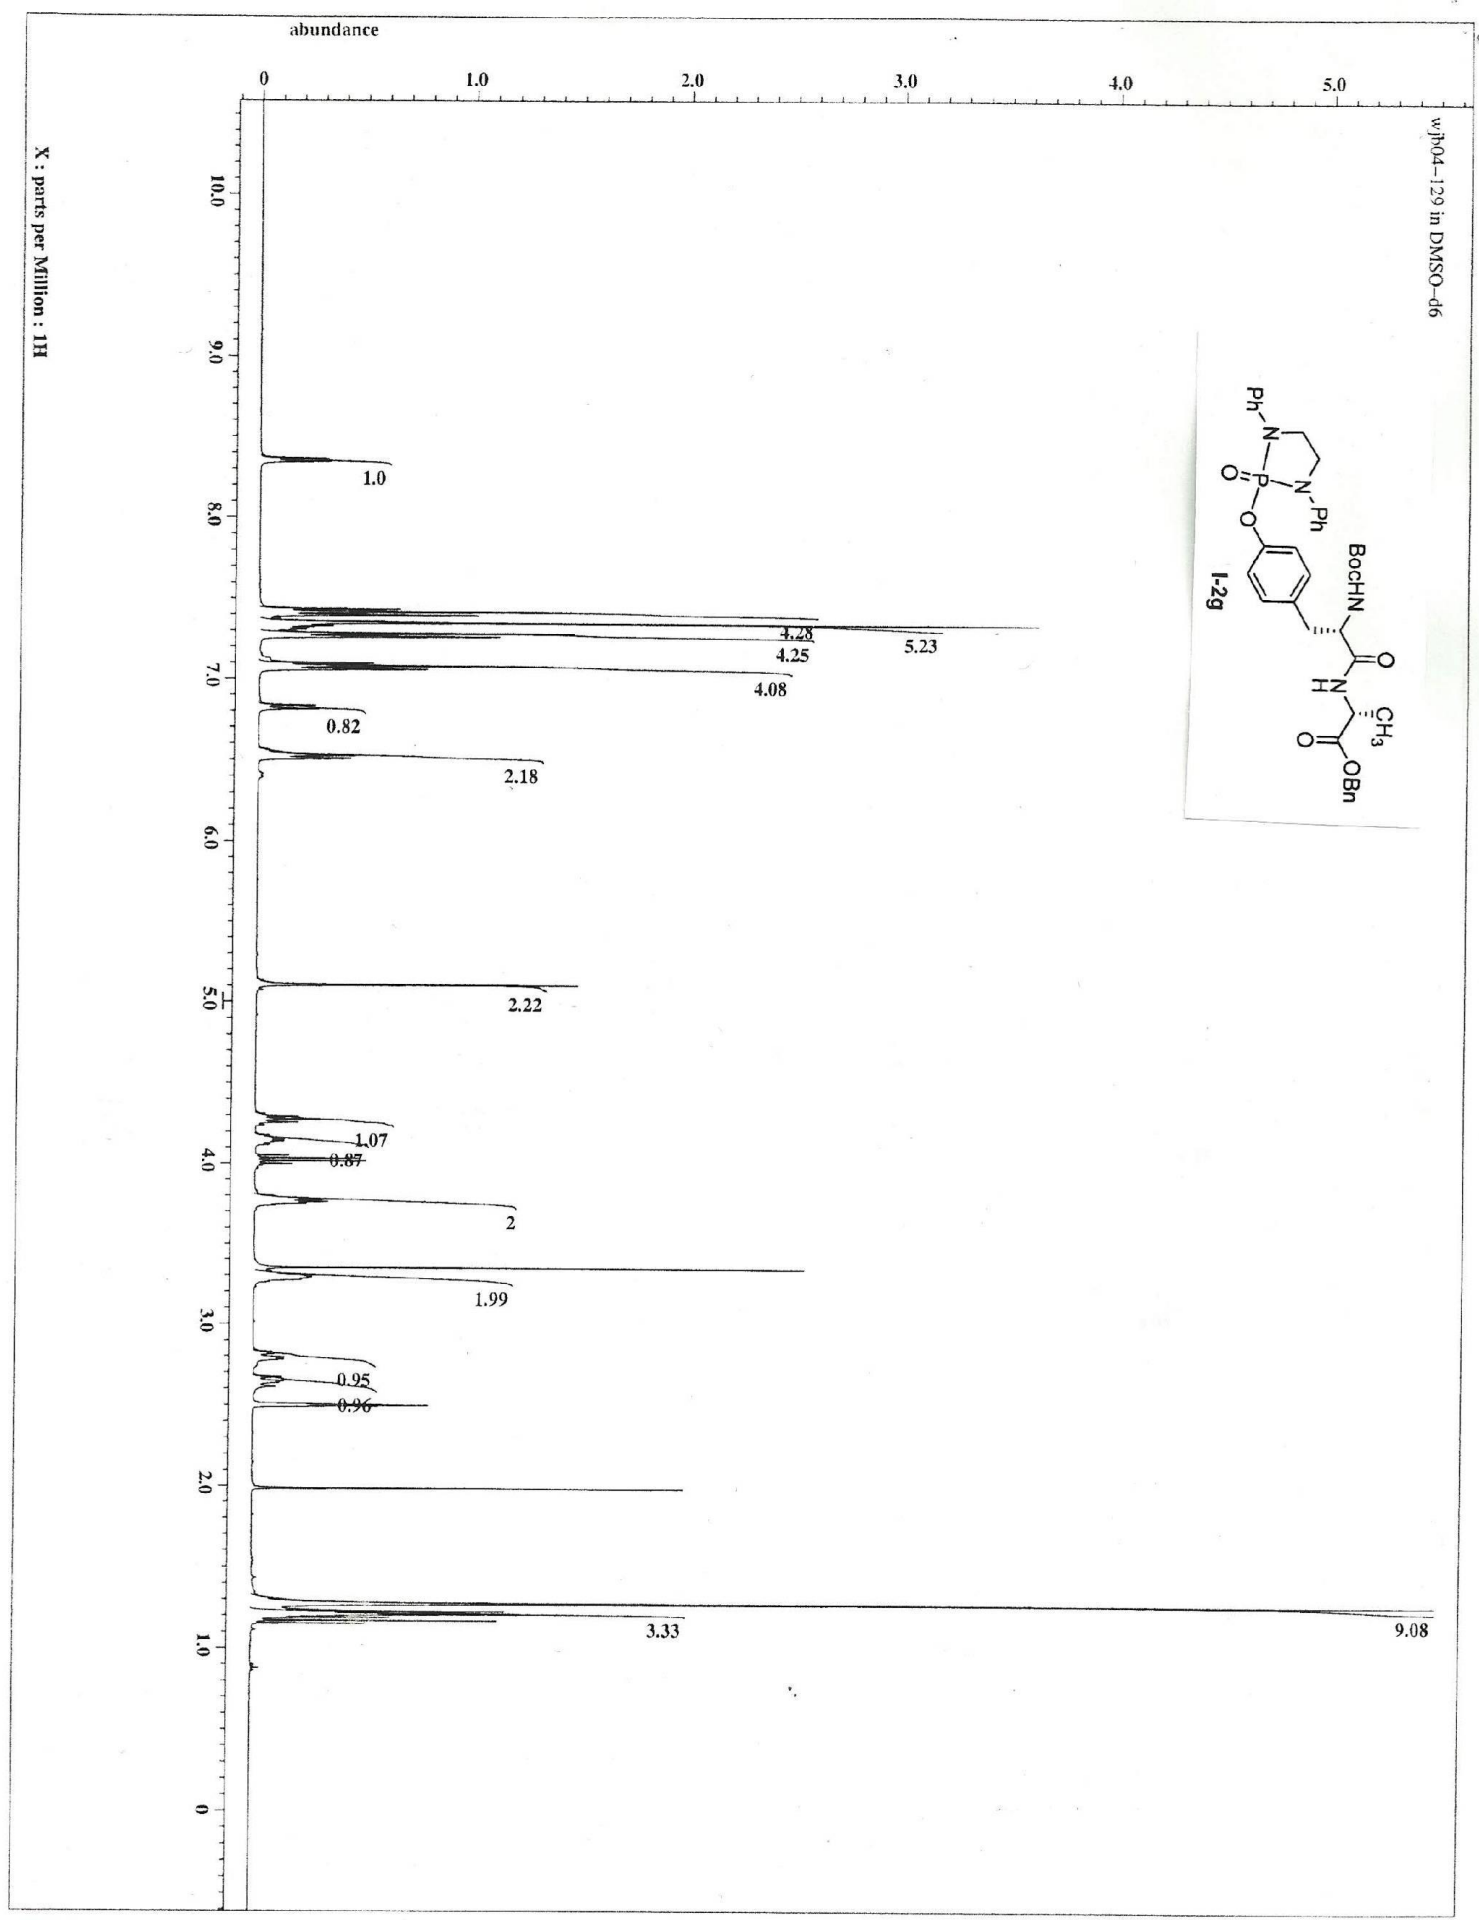

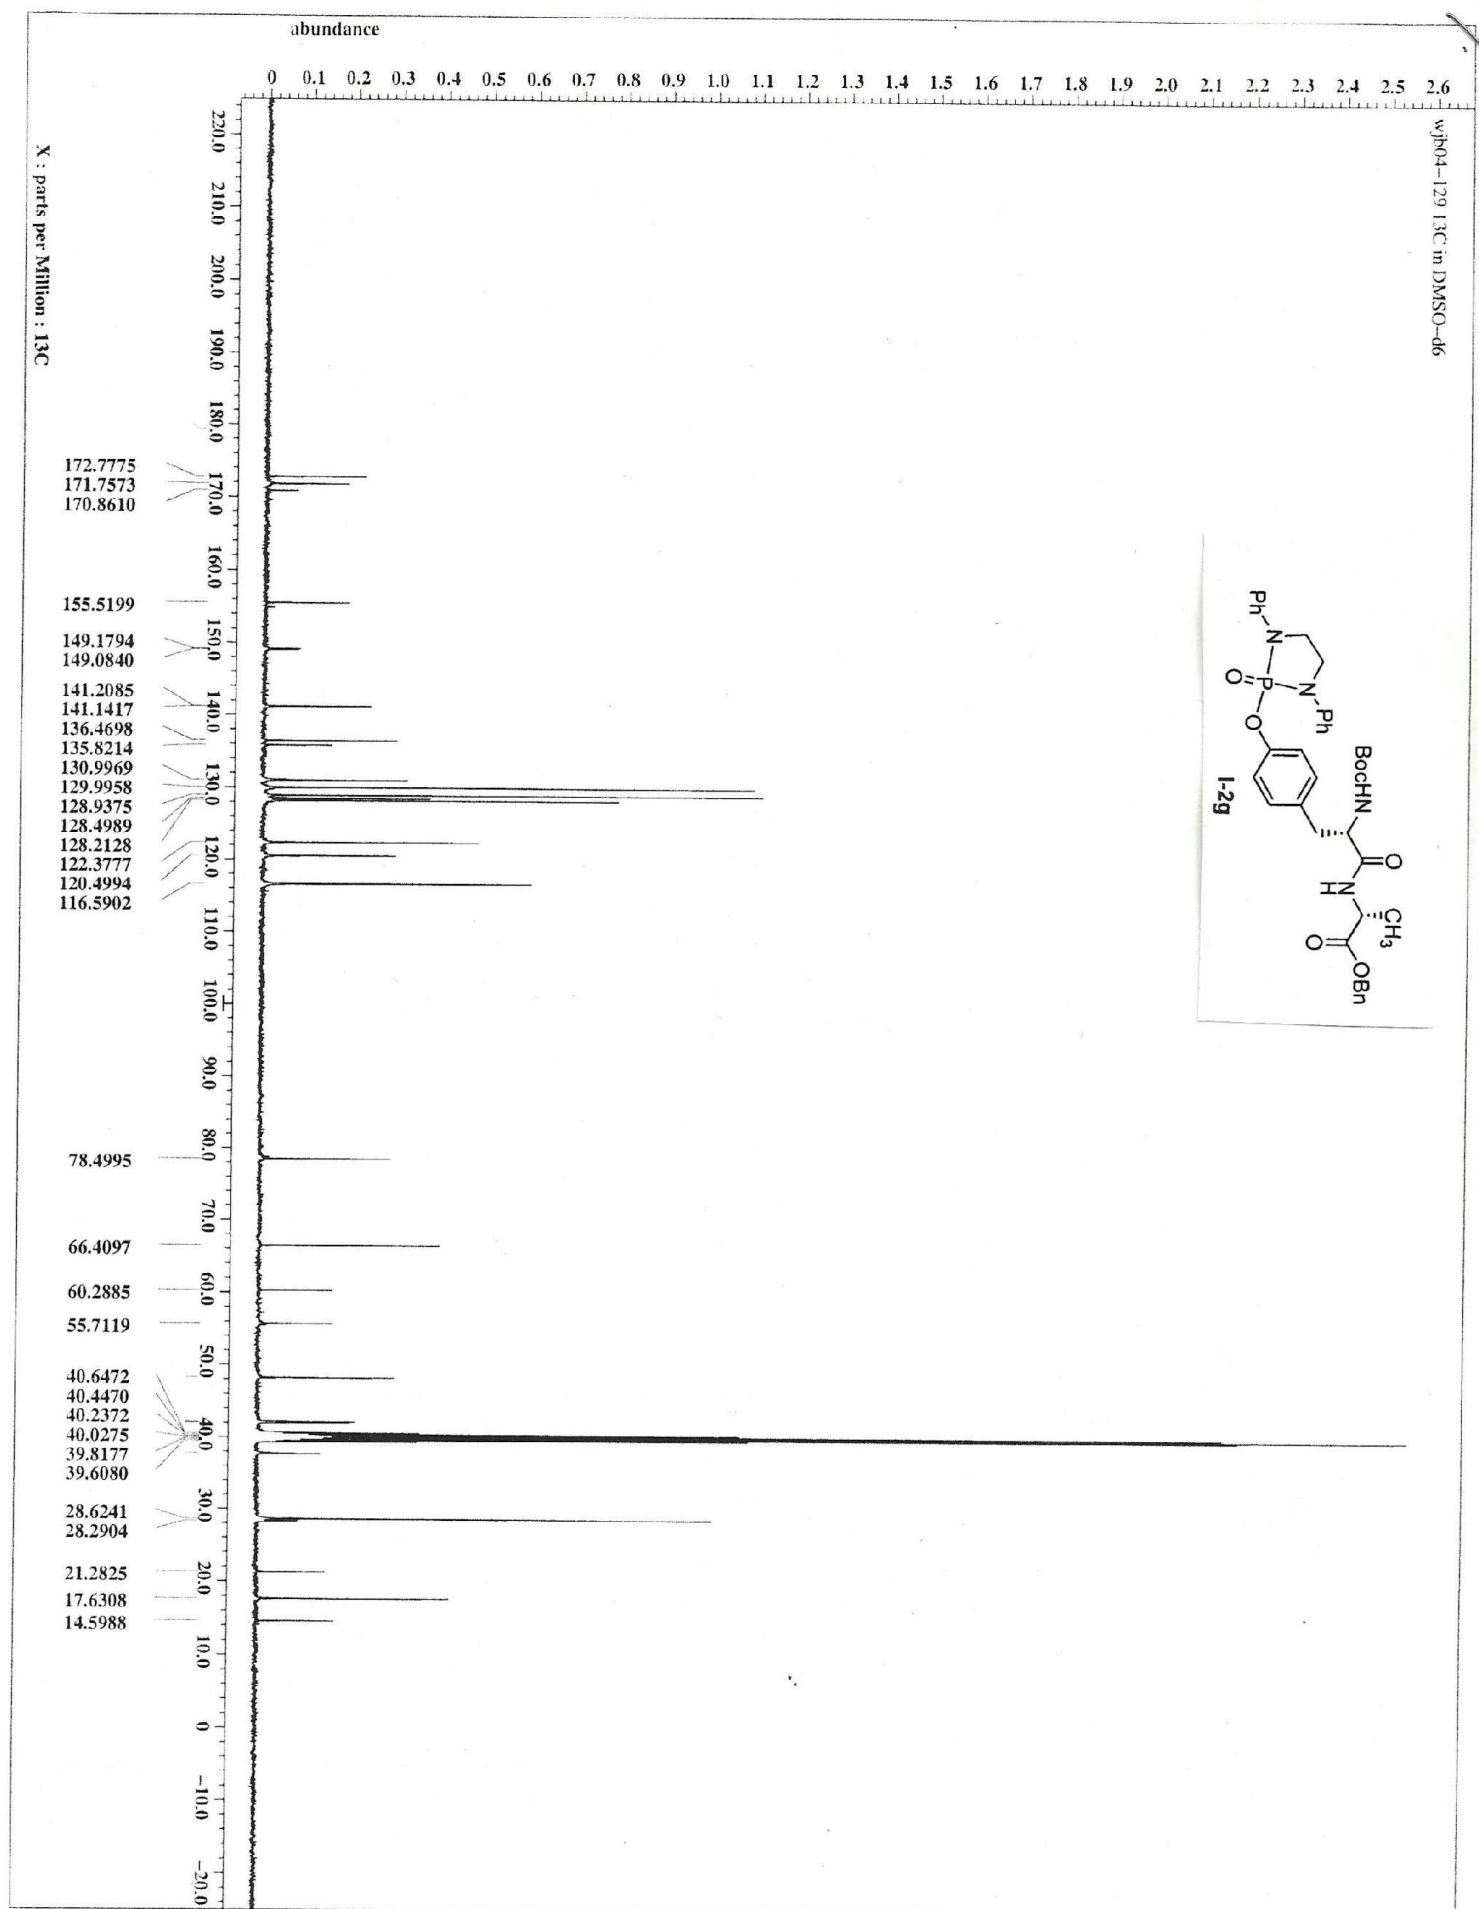



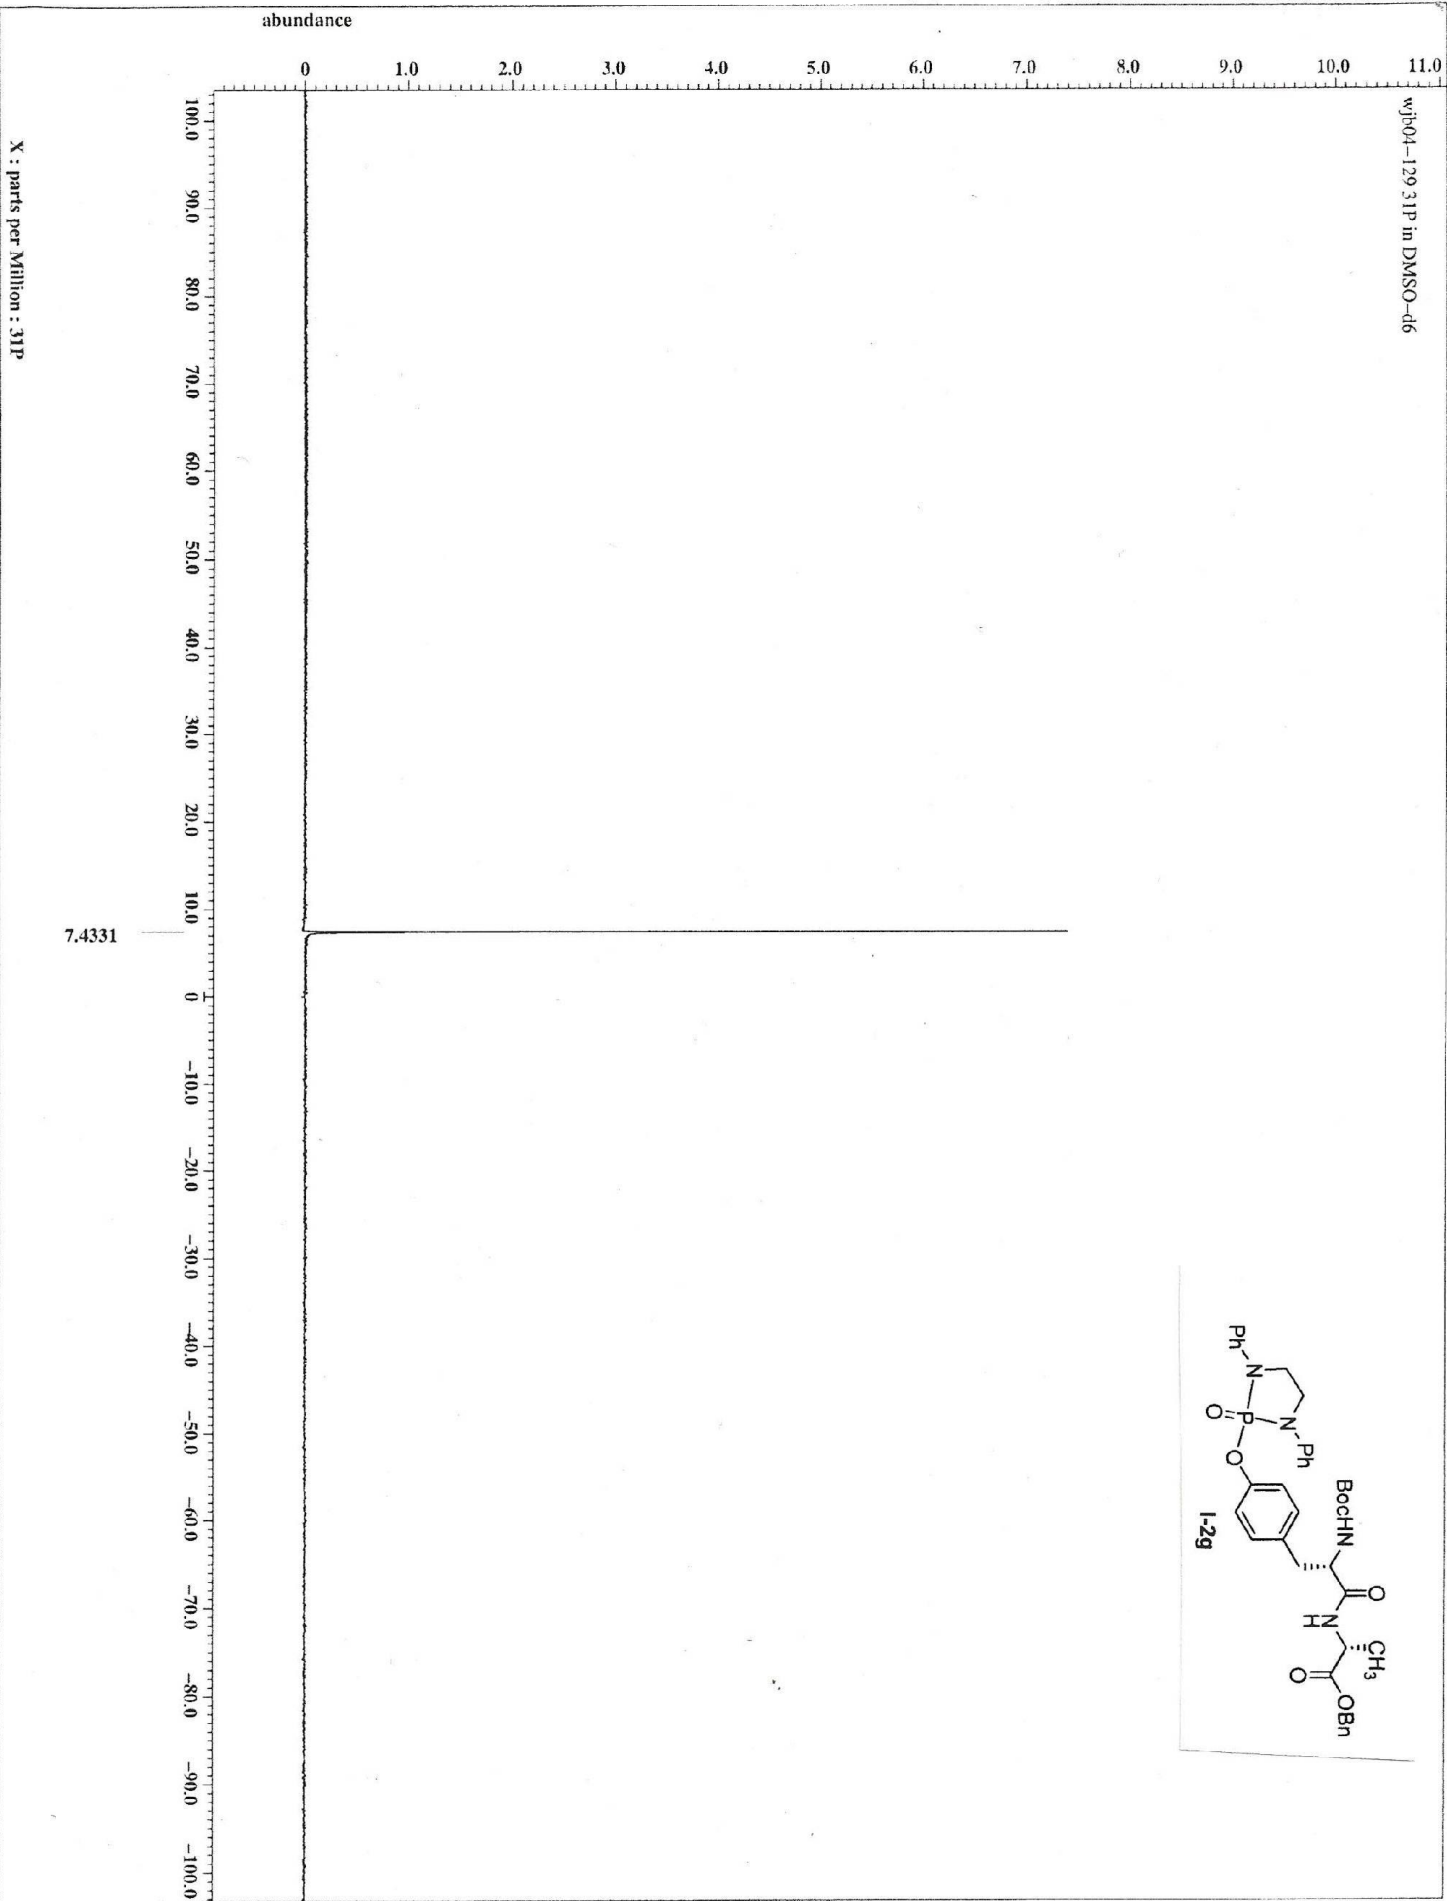

G:\MS Facility\GLW04-129\_12042012\_01

12/4/2012 3:36:29 PM

W04-129\_12042012\_01 #128 RT: 1.46 AV: 1 NL: 2.73E6  
T: FTMS + p ESI Full ms [150.00-2000.00]

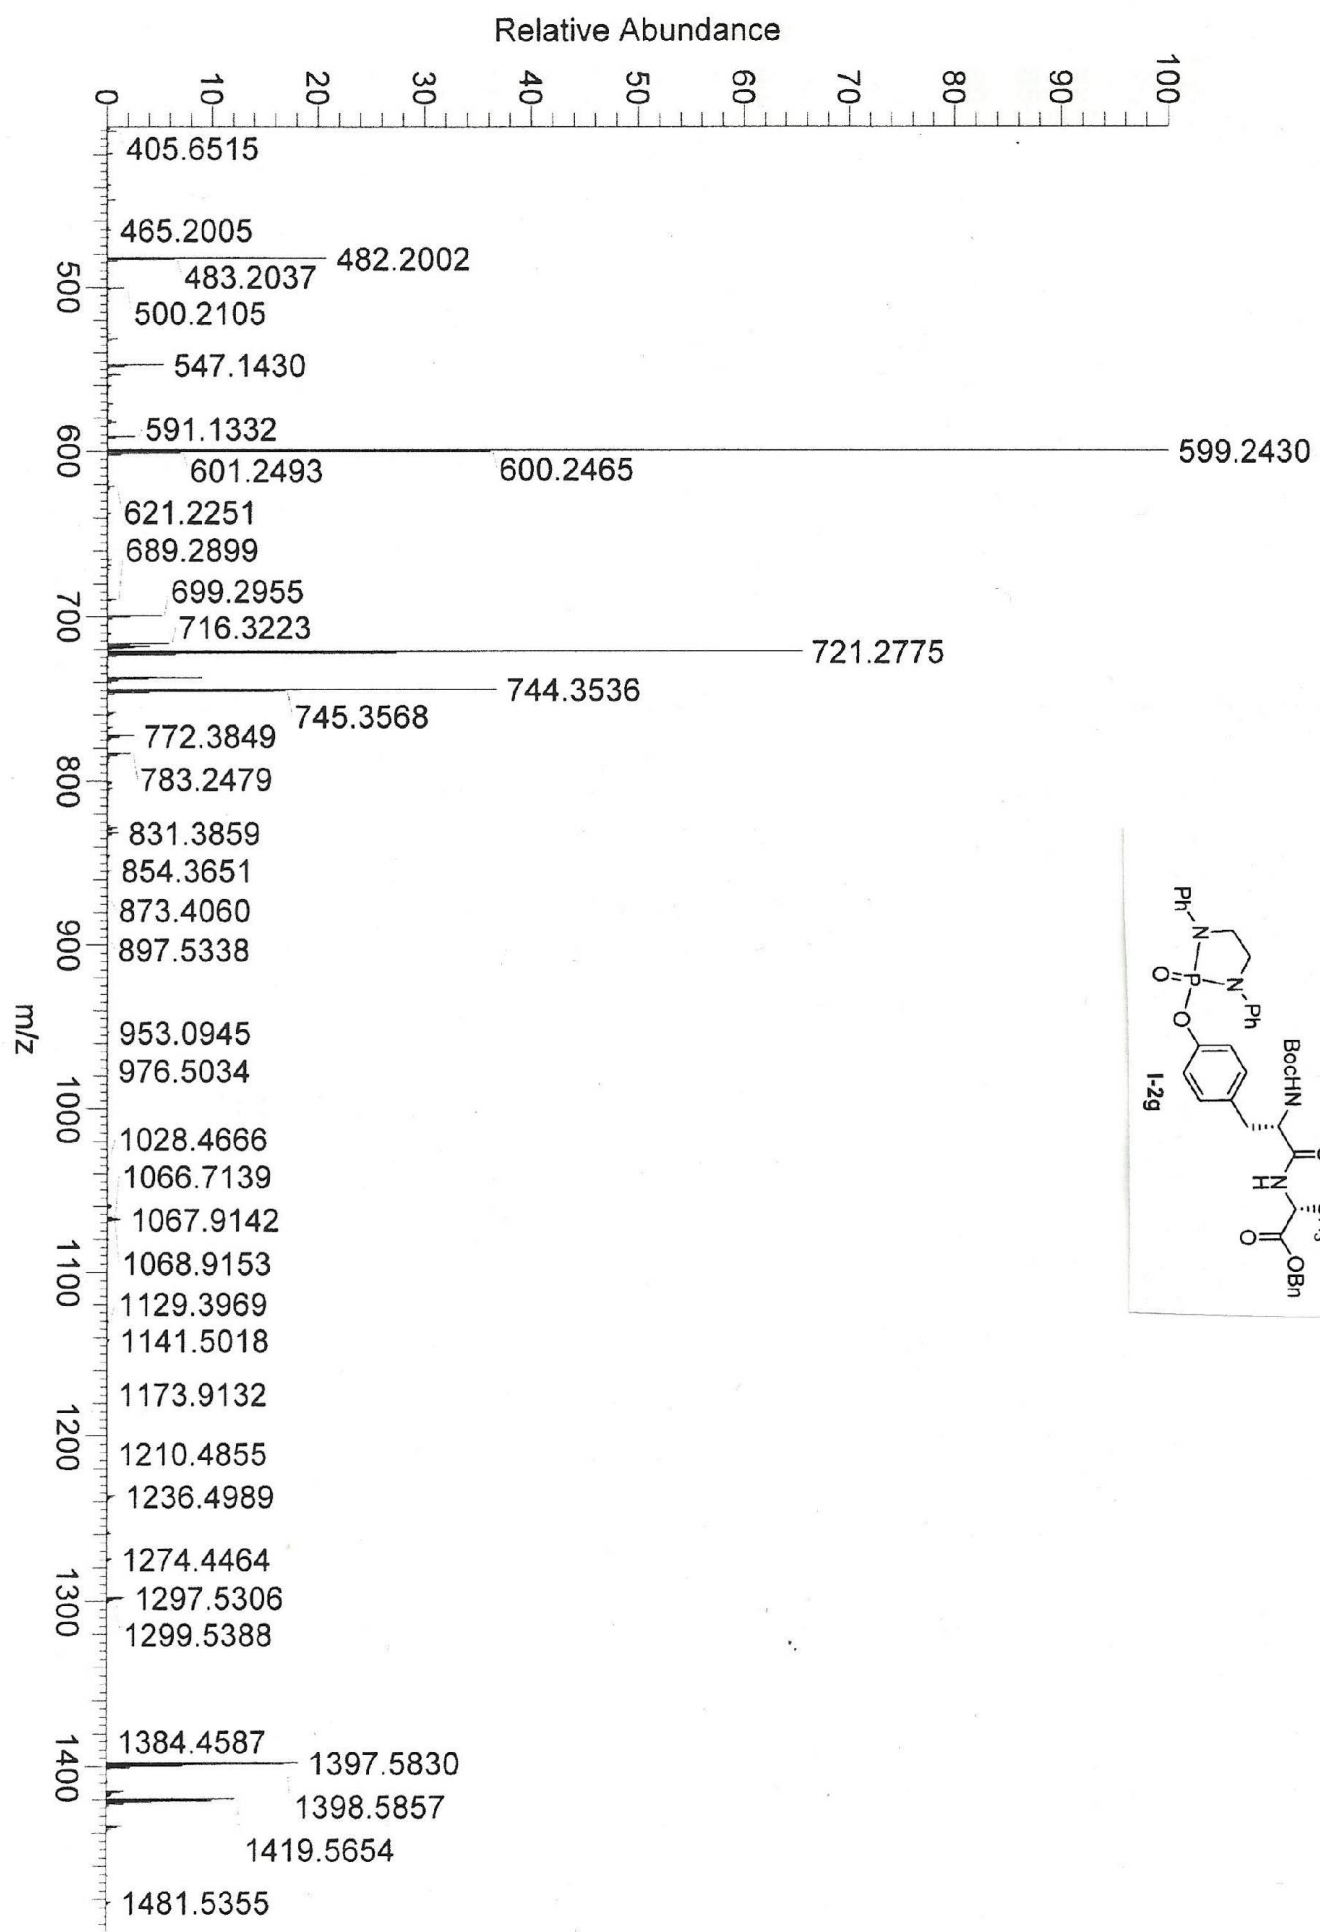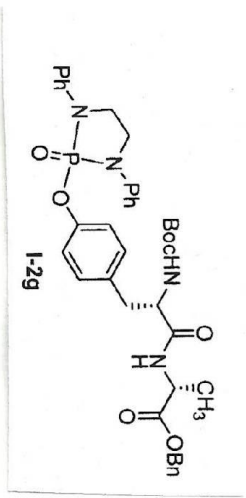

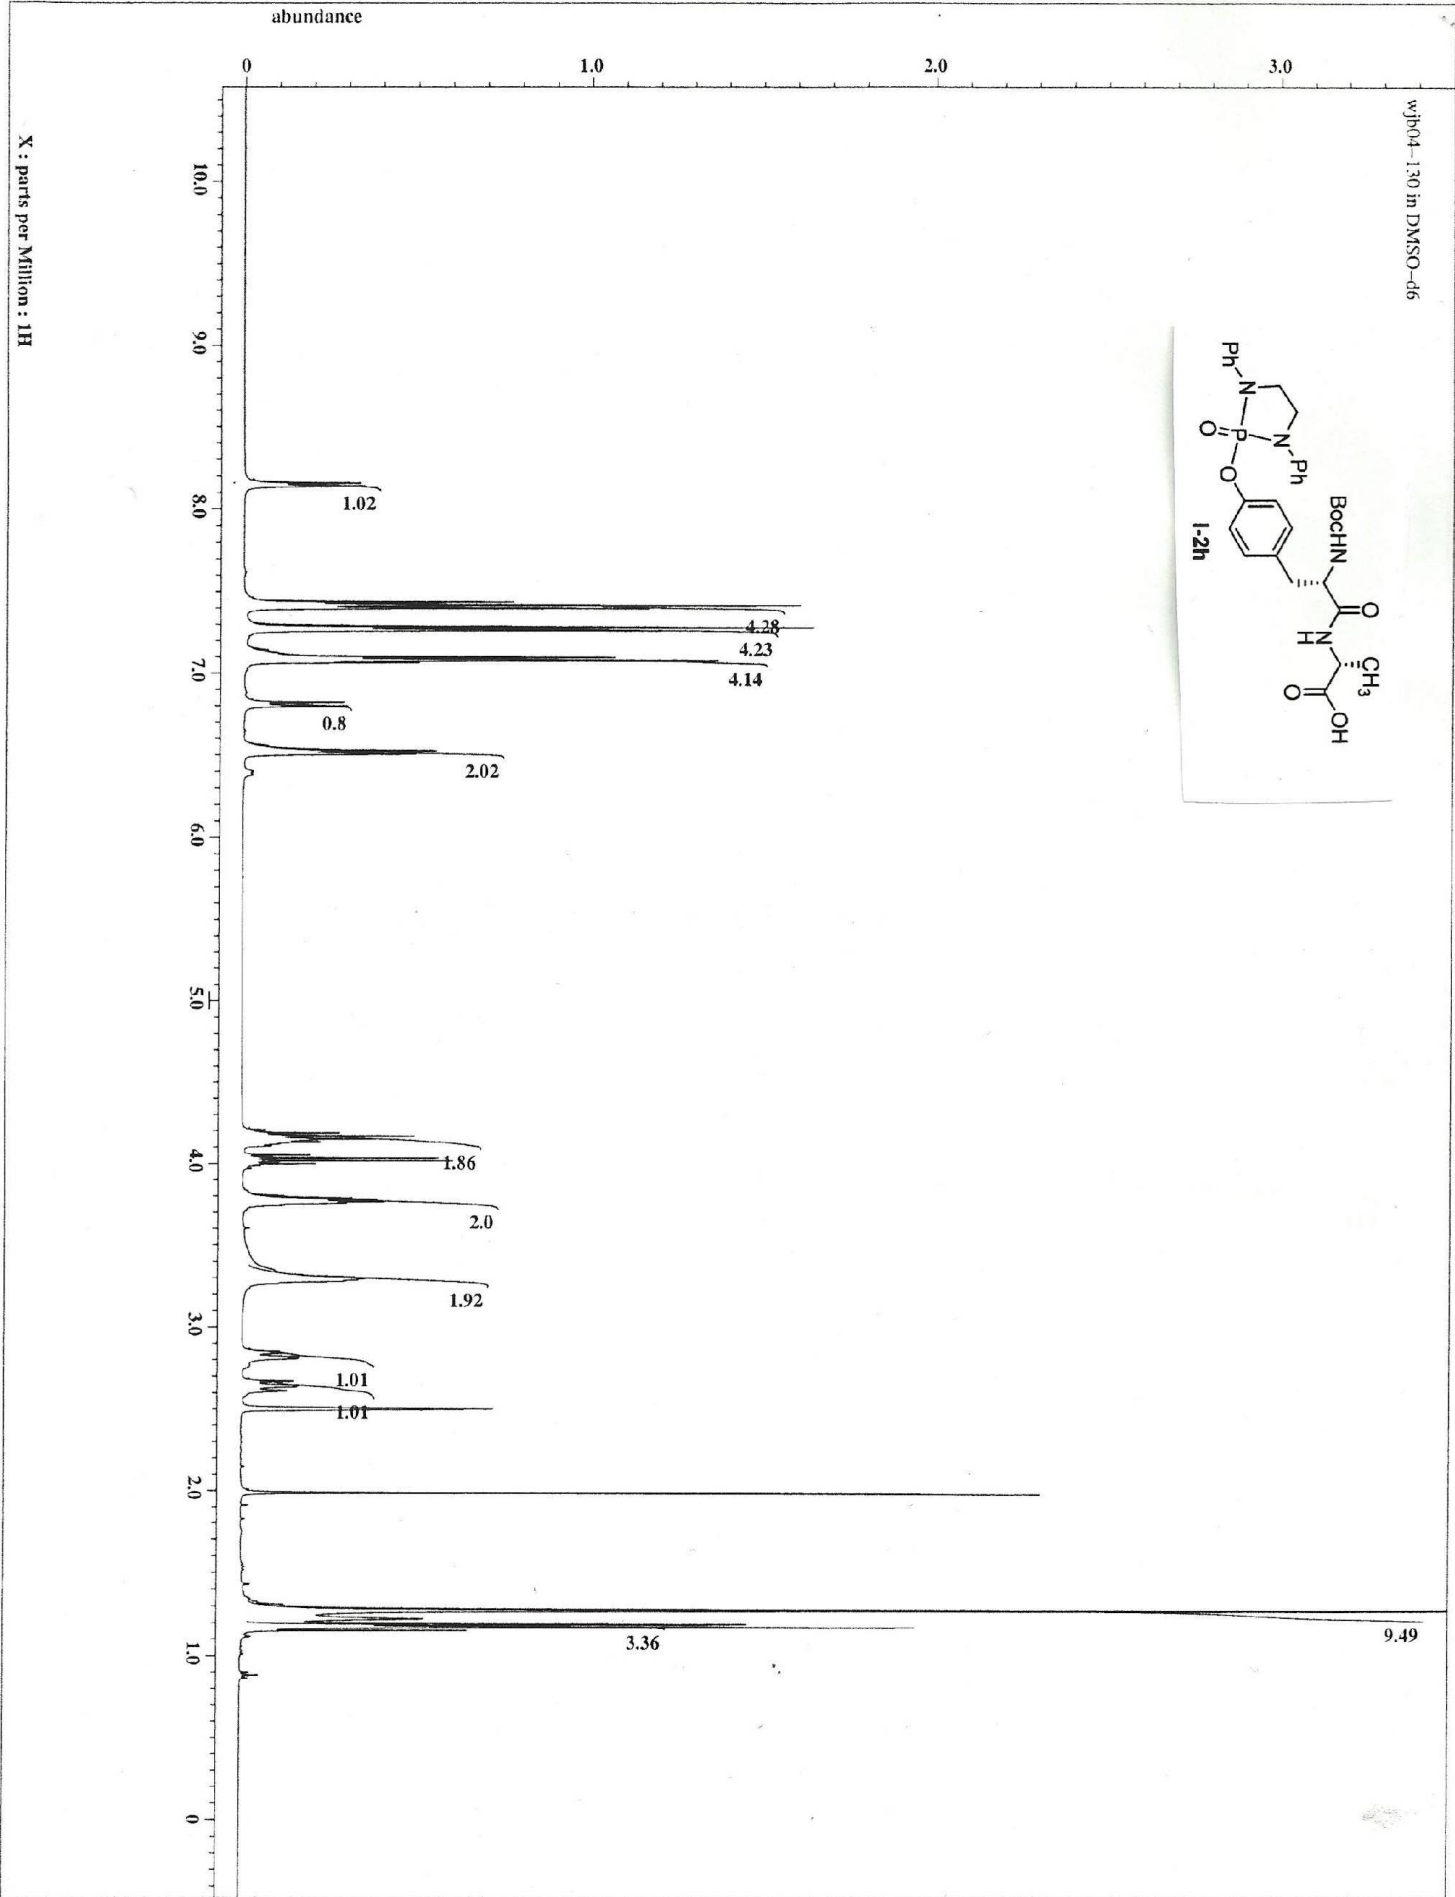

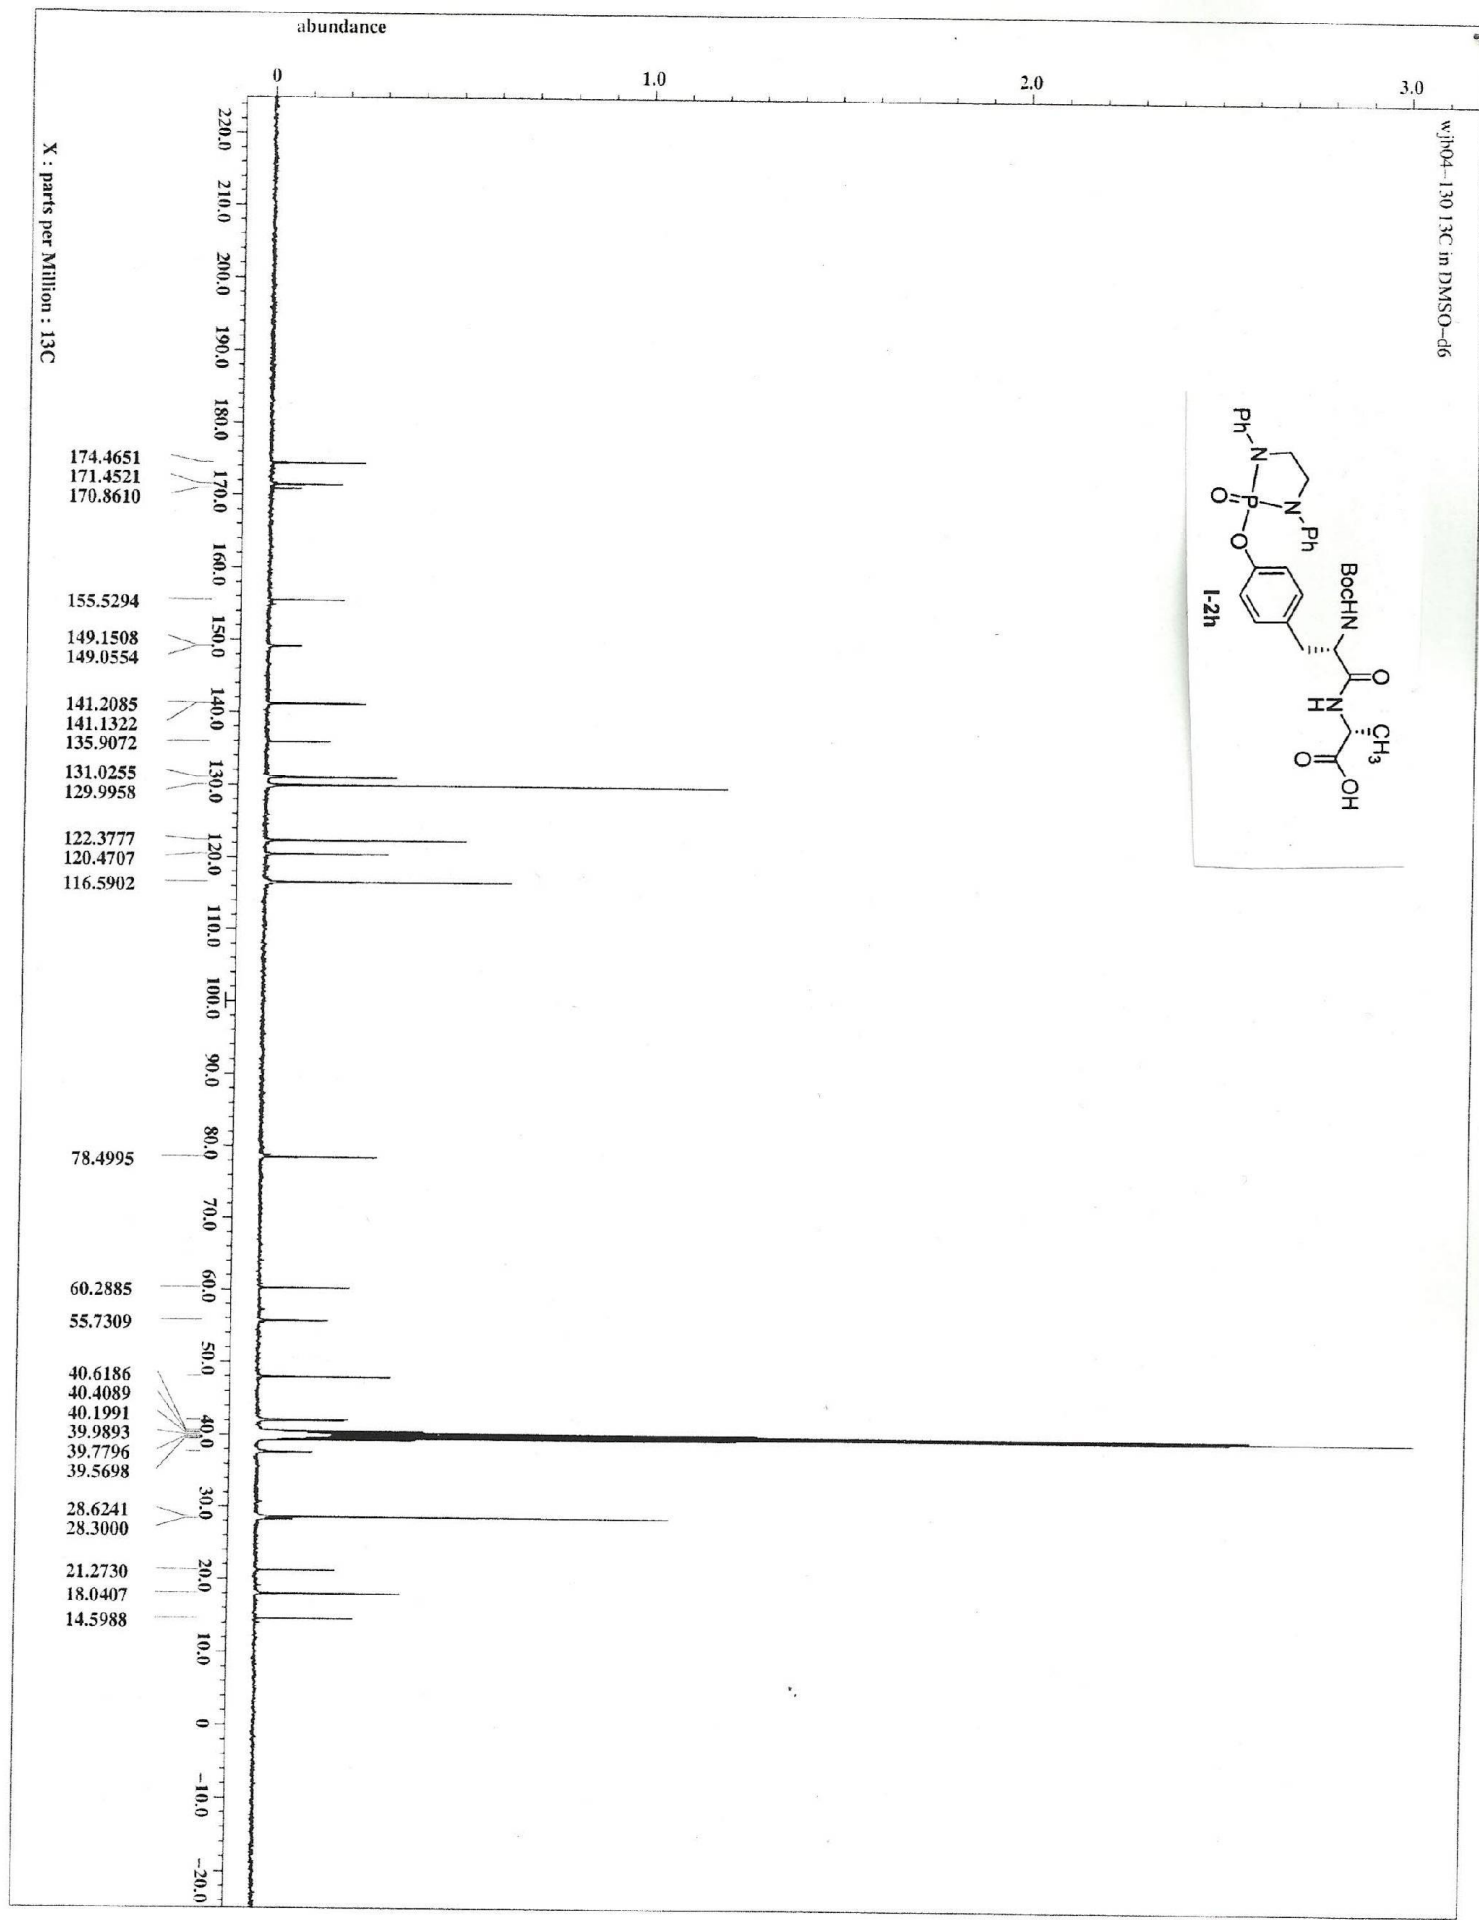

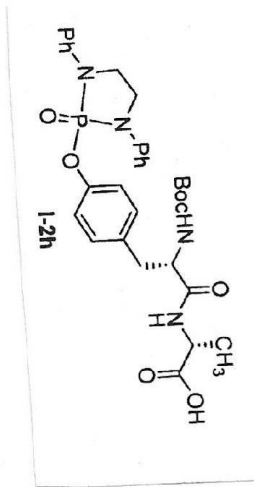

G:\MS Facility\GL\W04-130\_12042012\_01  
12/4/2012 3:40:00 PM

W04-130\_12042012\_01 #155 RT: 1.65 AV: 1 NL: 1.58E6  
T: FTMS + p ESI Full ms [150.00-2000.00]

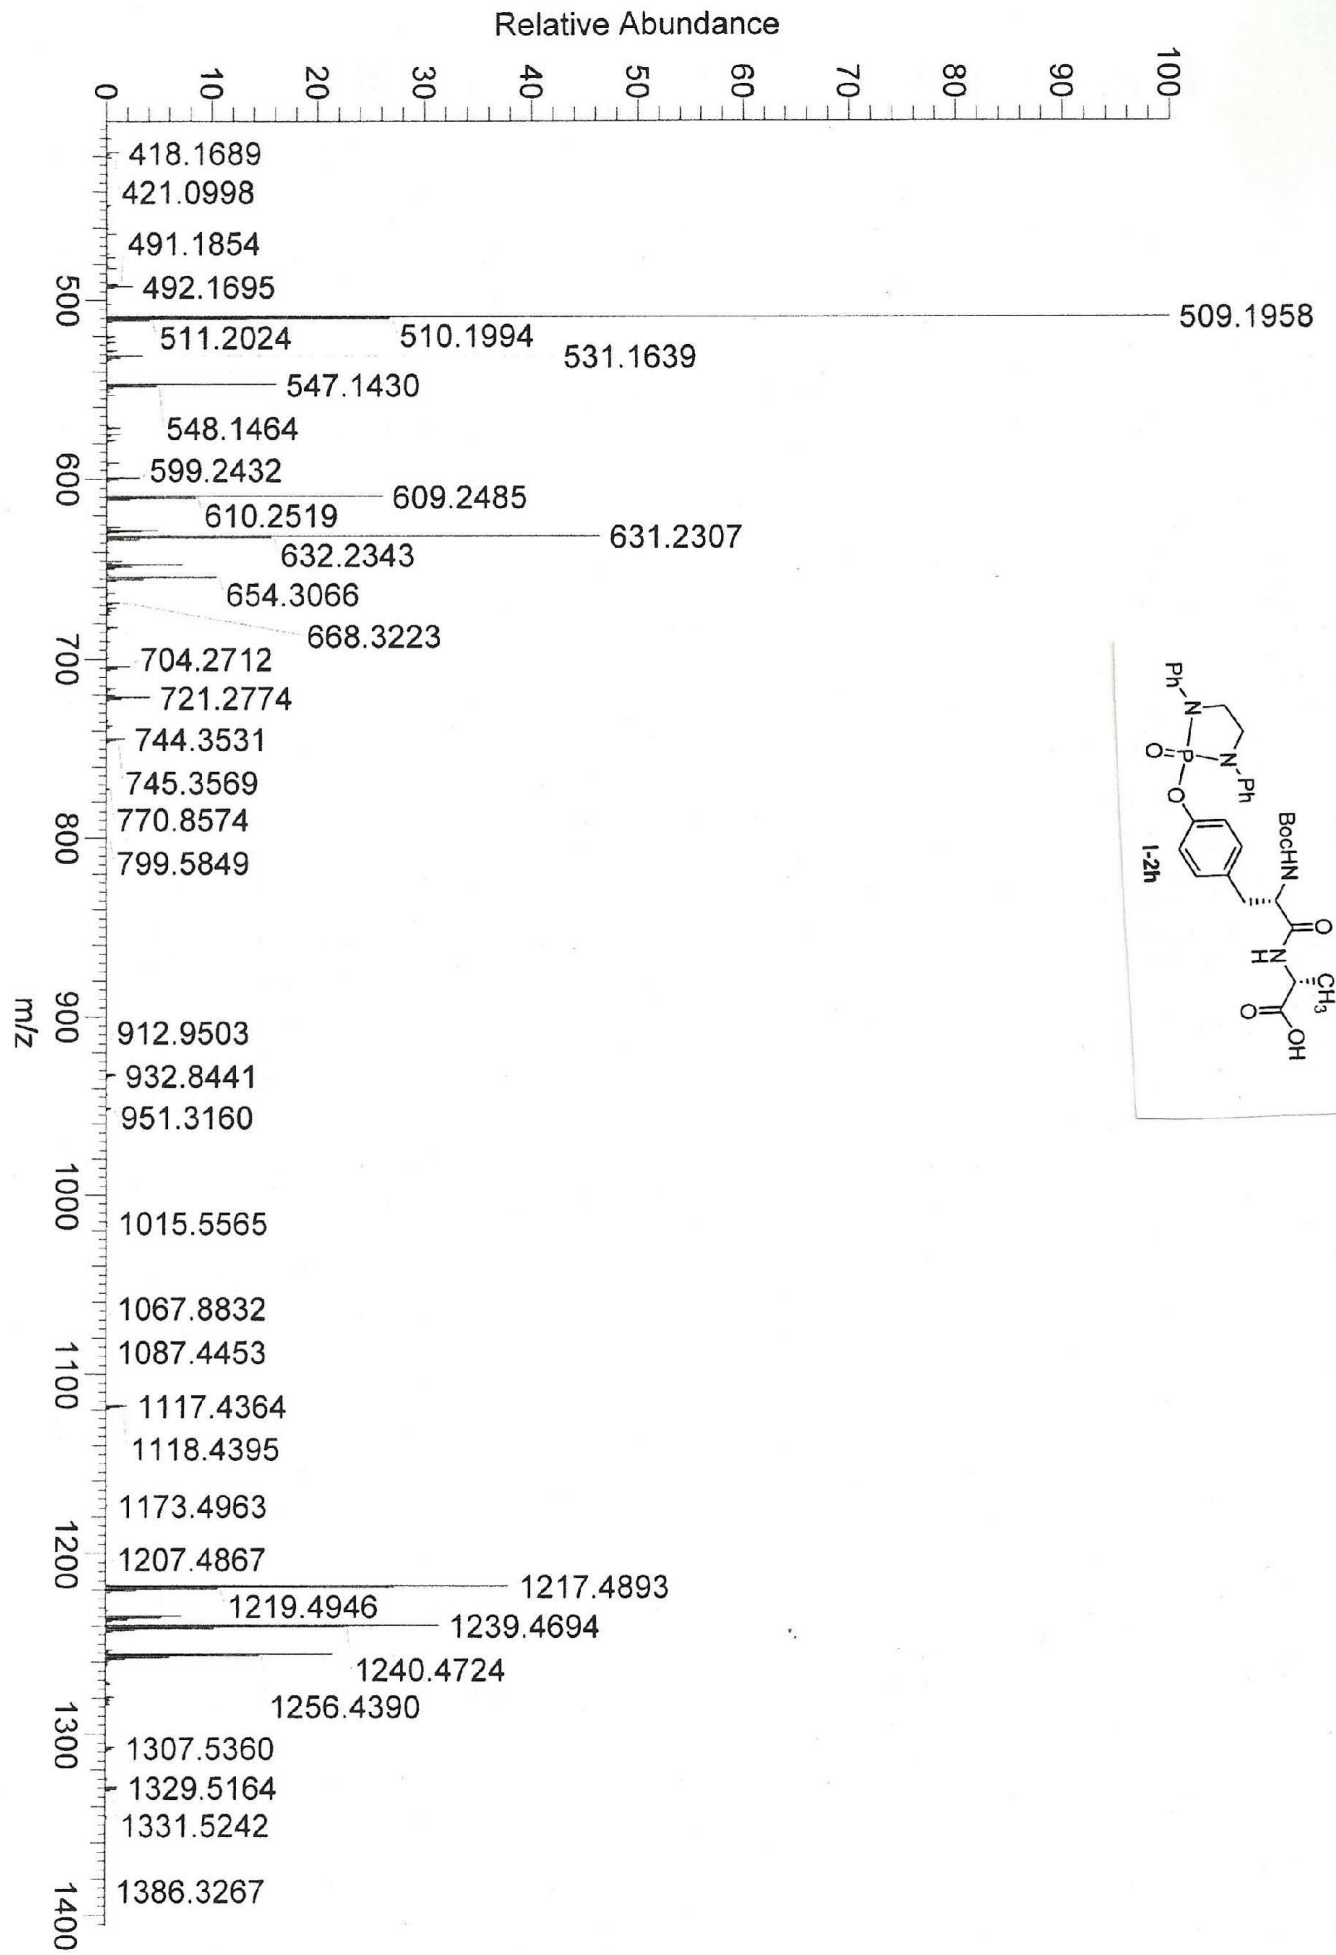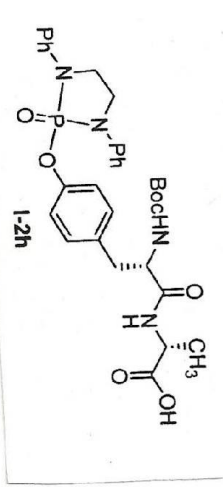



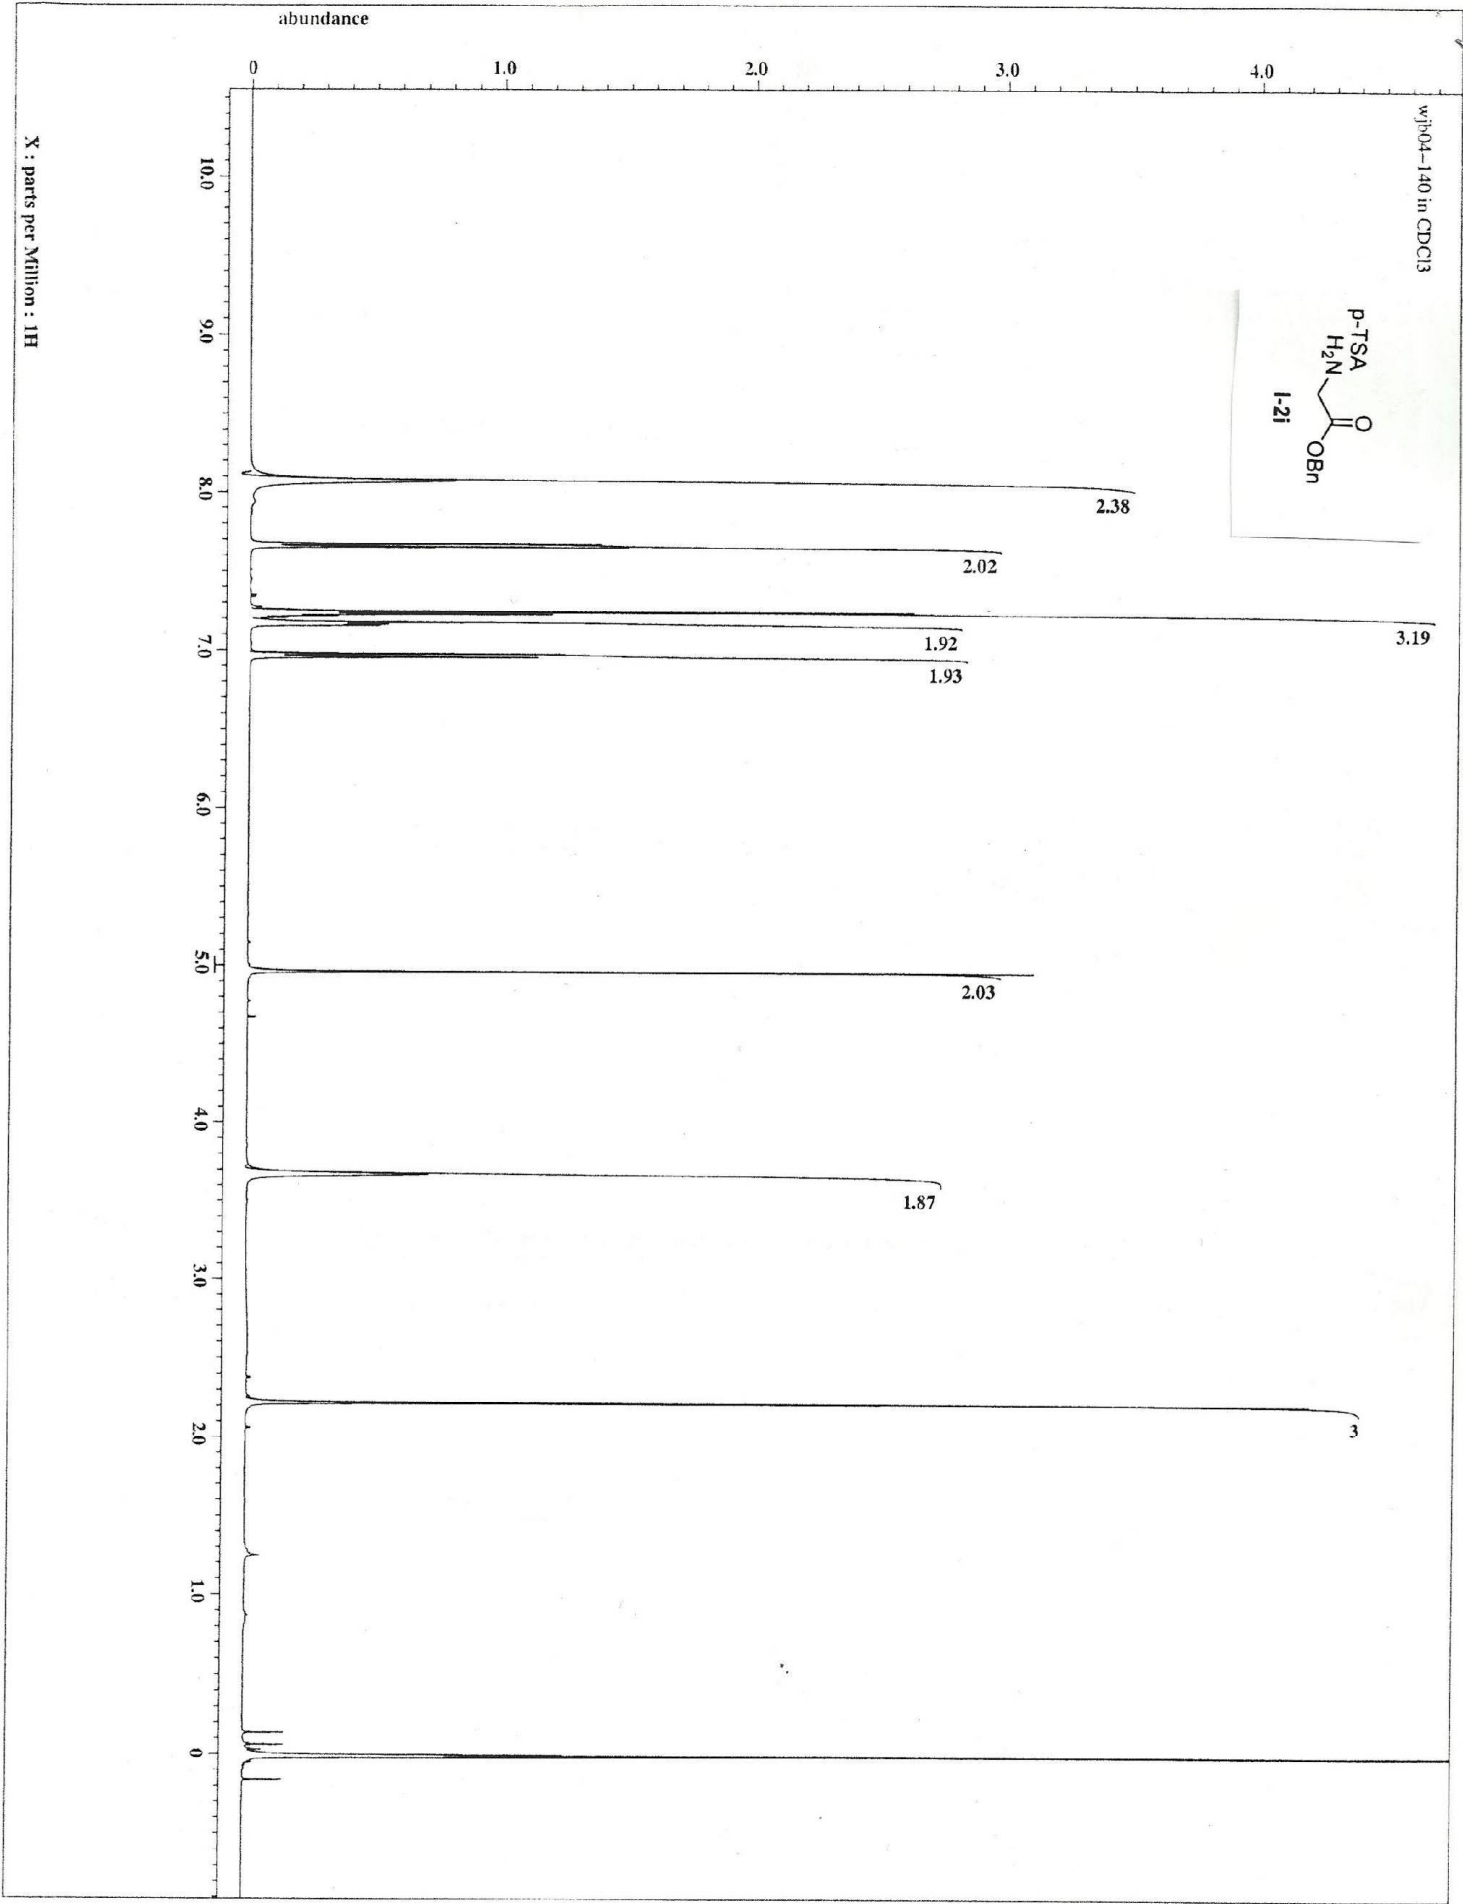

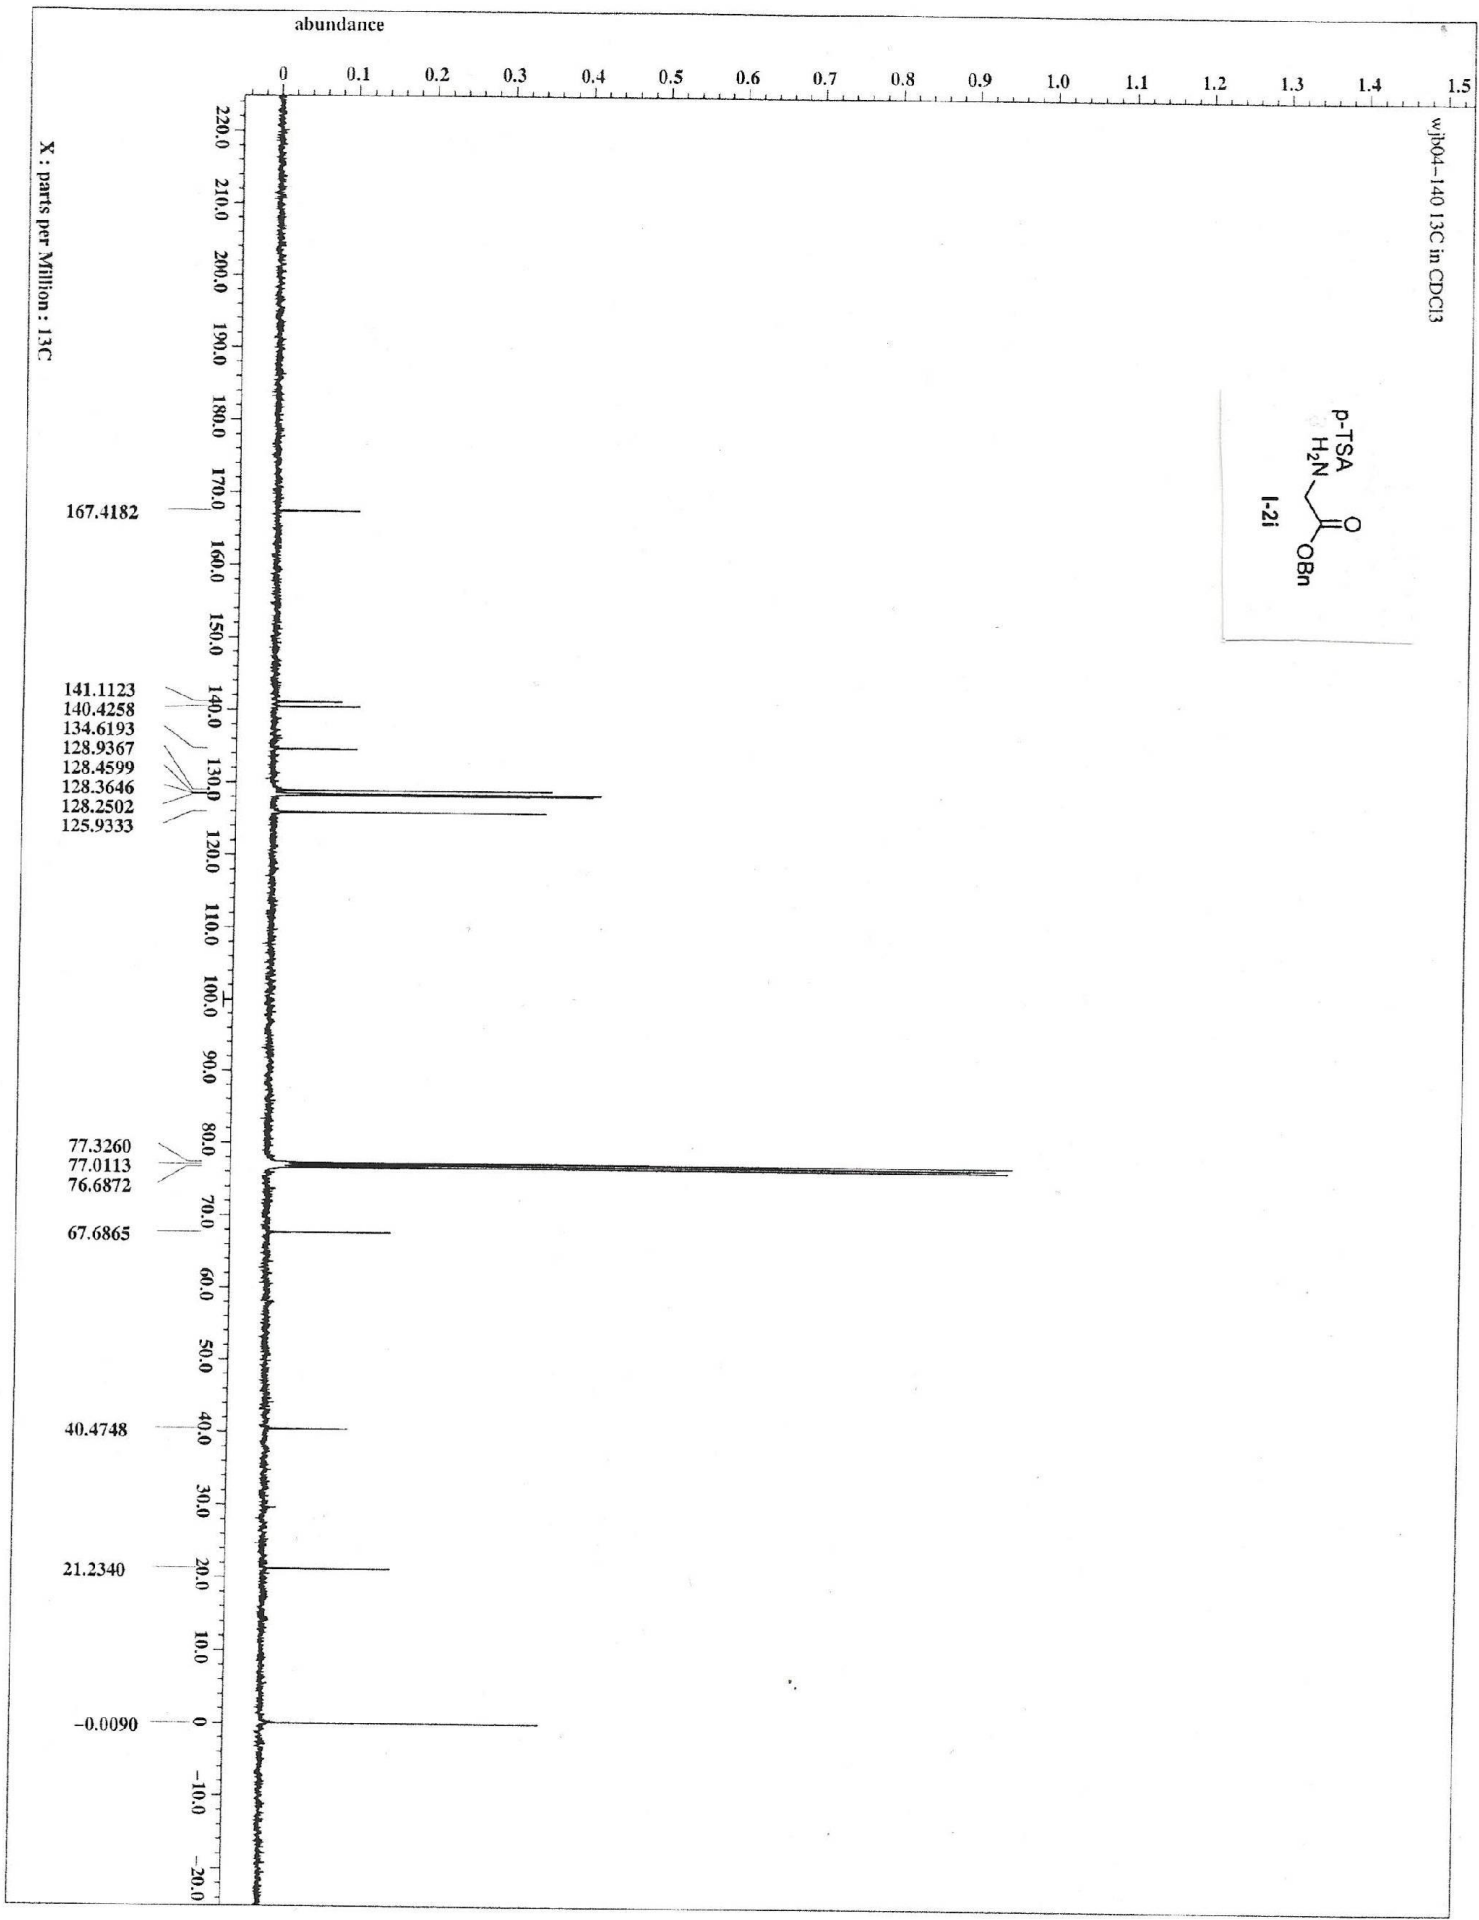



#1007 RT: 4.155 AV: 6 IT: 100.000 ST: 1.09 US: 4 NL: 6.64E2  
F: ITMS + p ESI Full ms2 166.00@cid20.00 [50.00-300.00]

WJ8-04-140

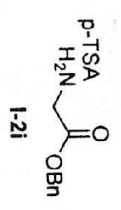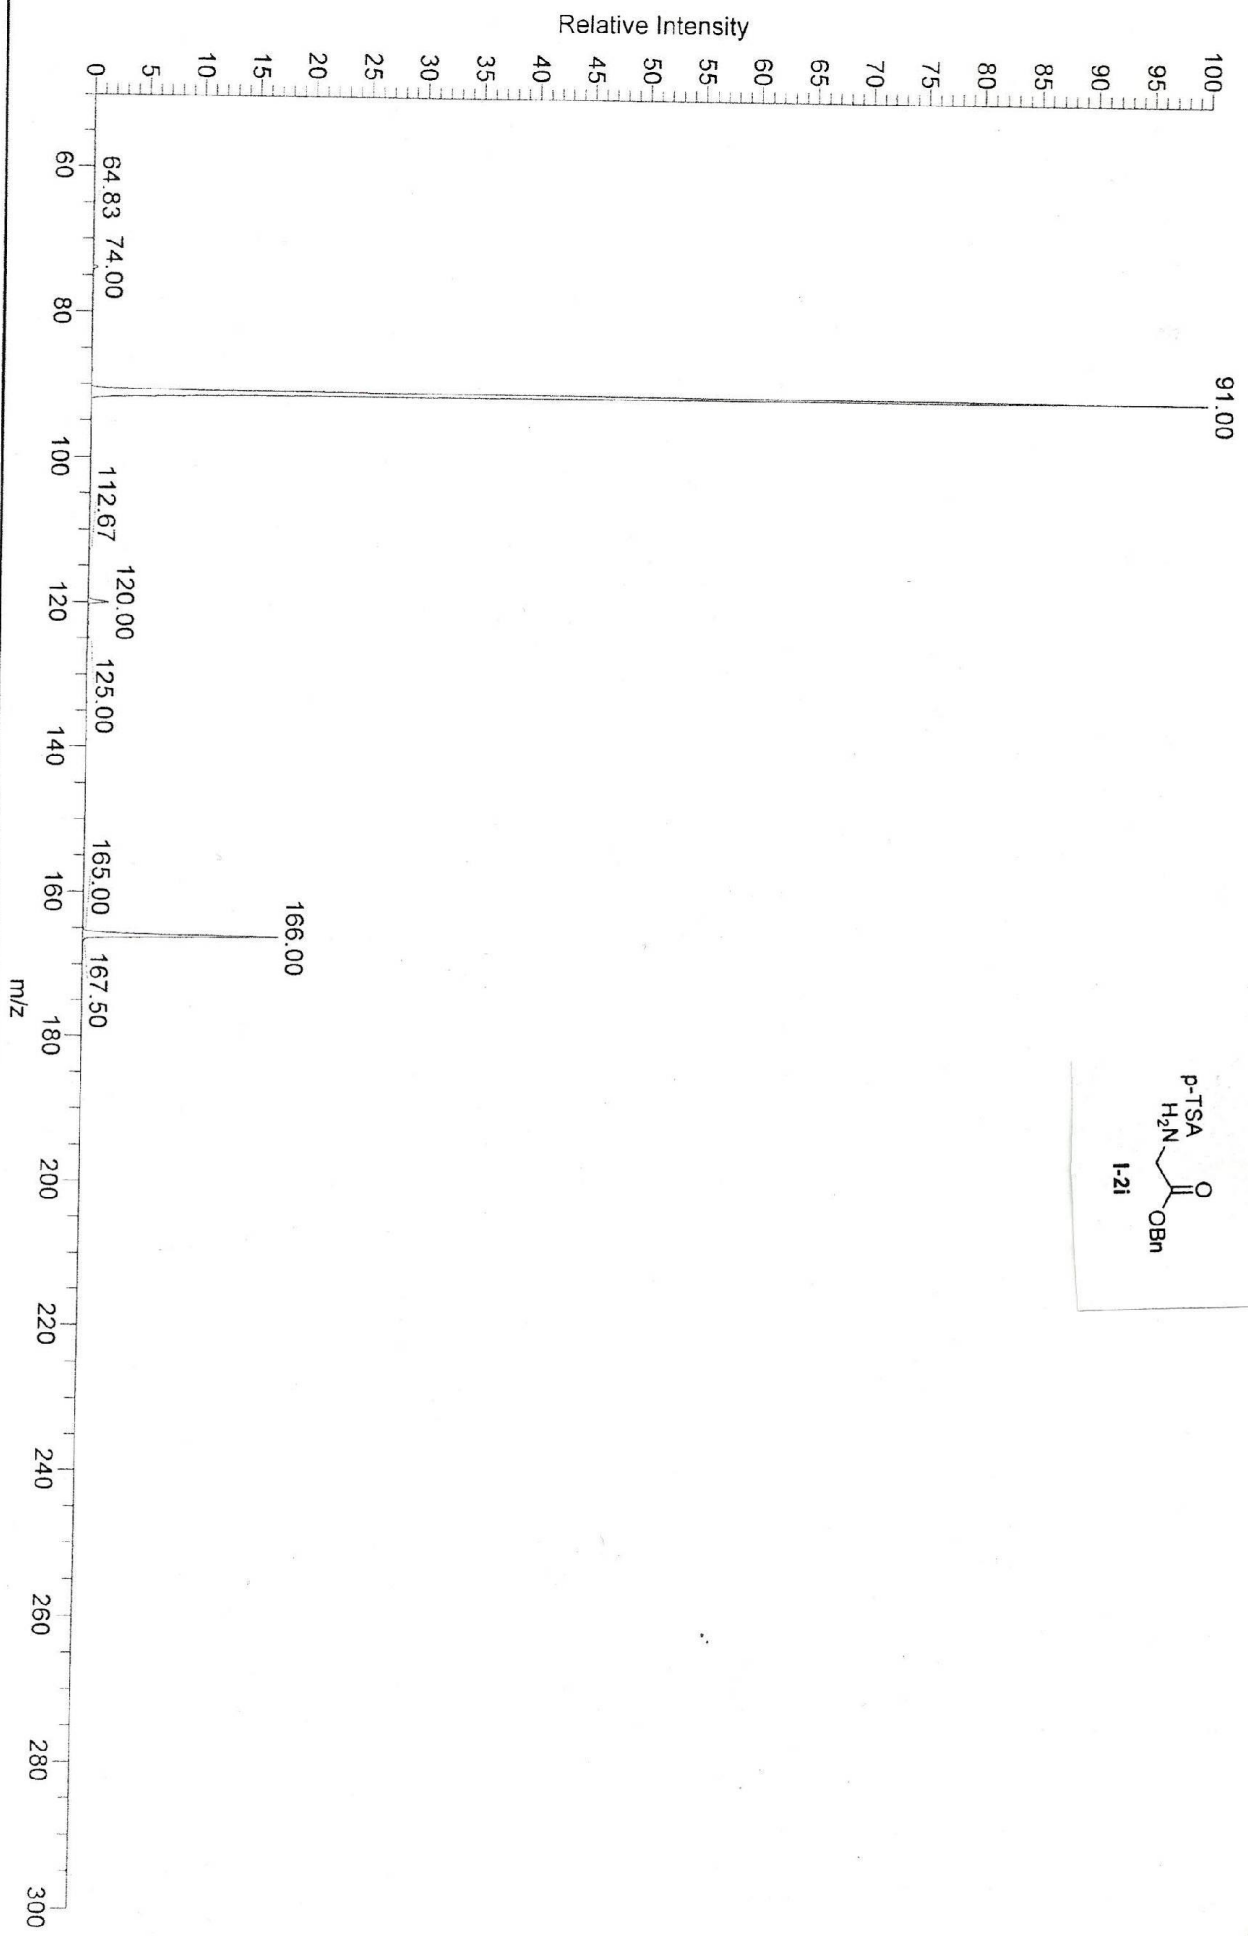

LTQ Tune rev. LCO Fleet 2.6.0 SP3

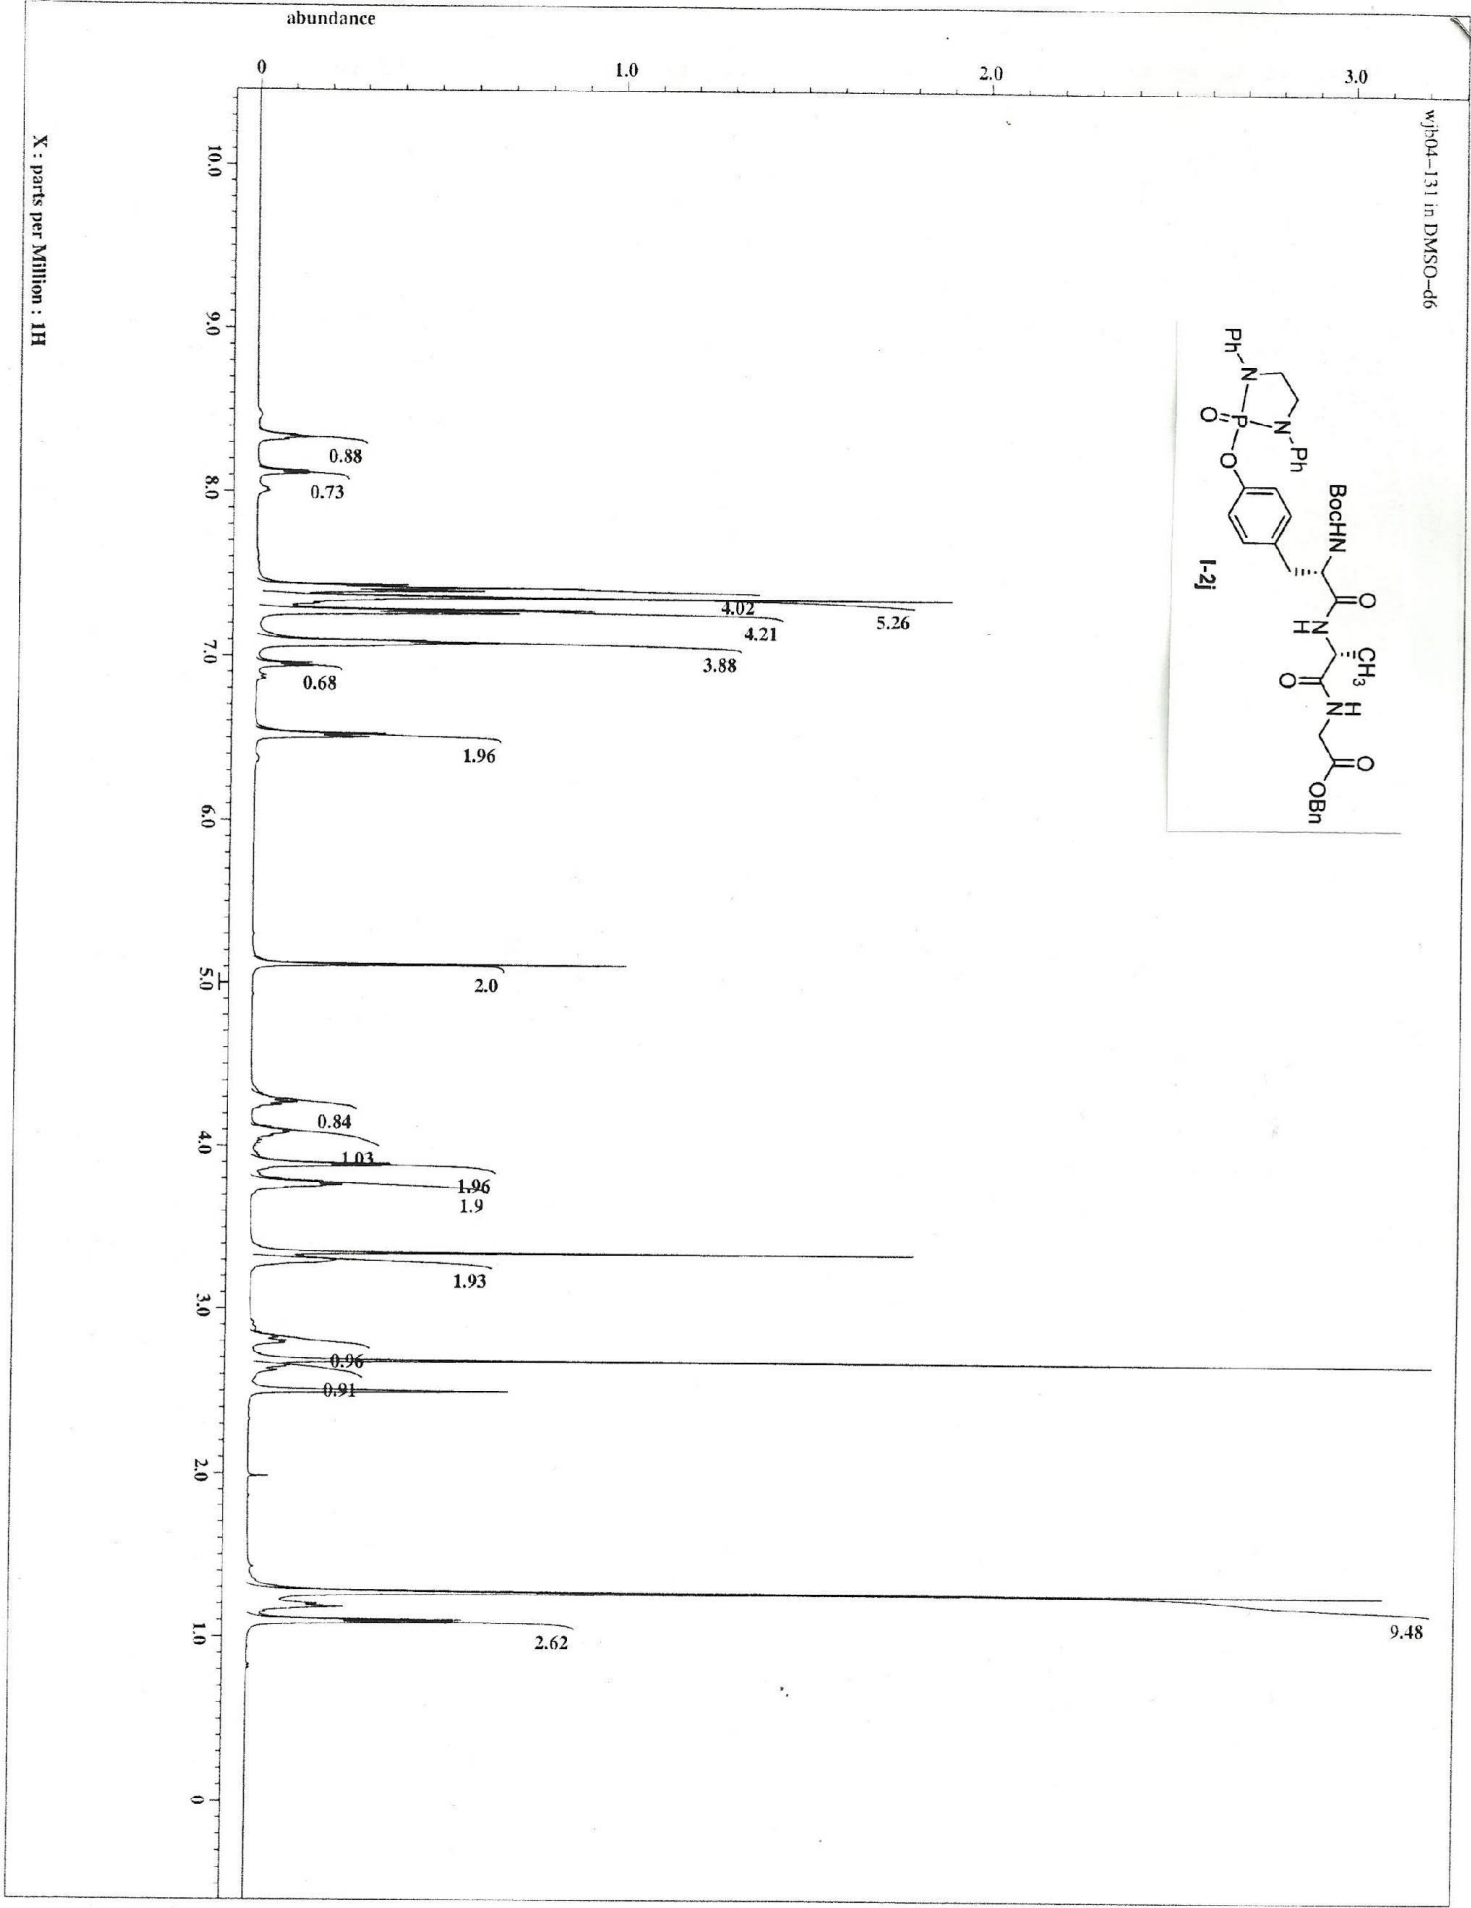

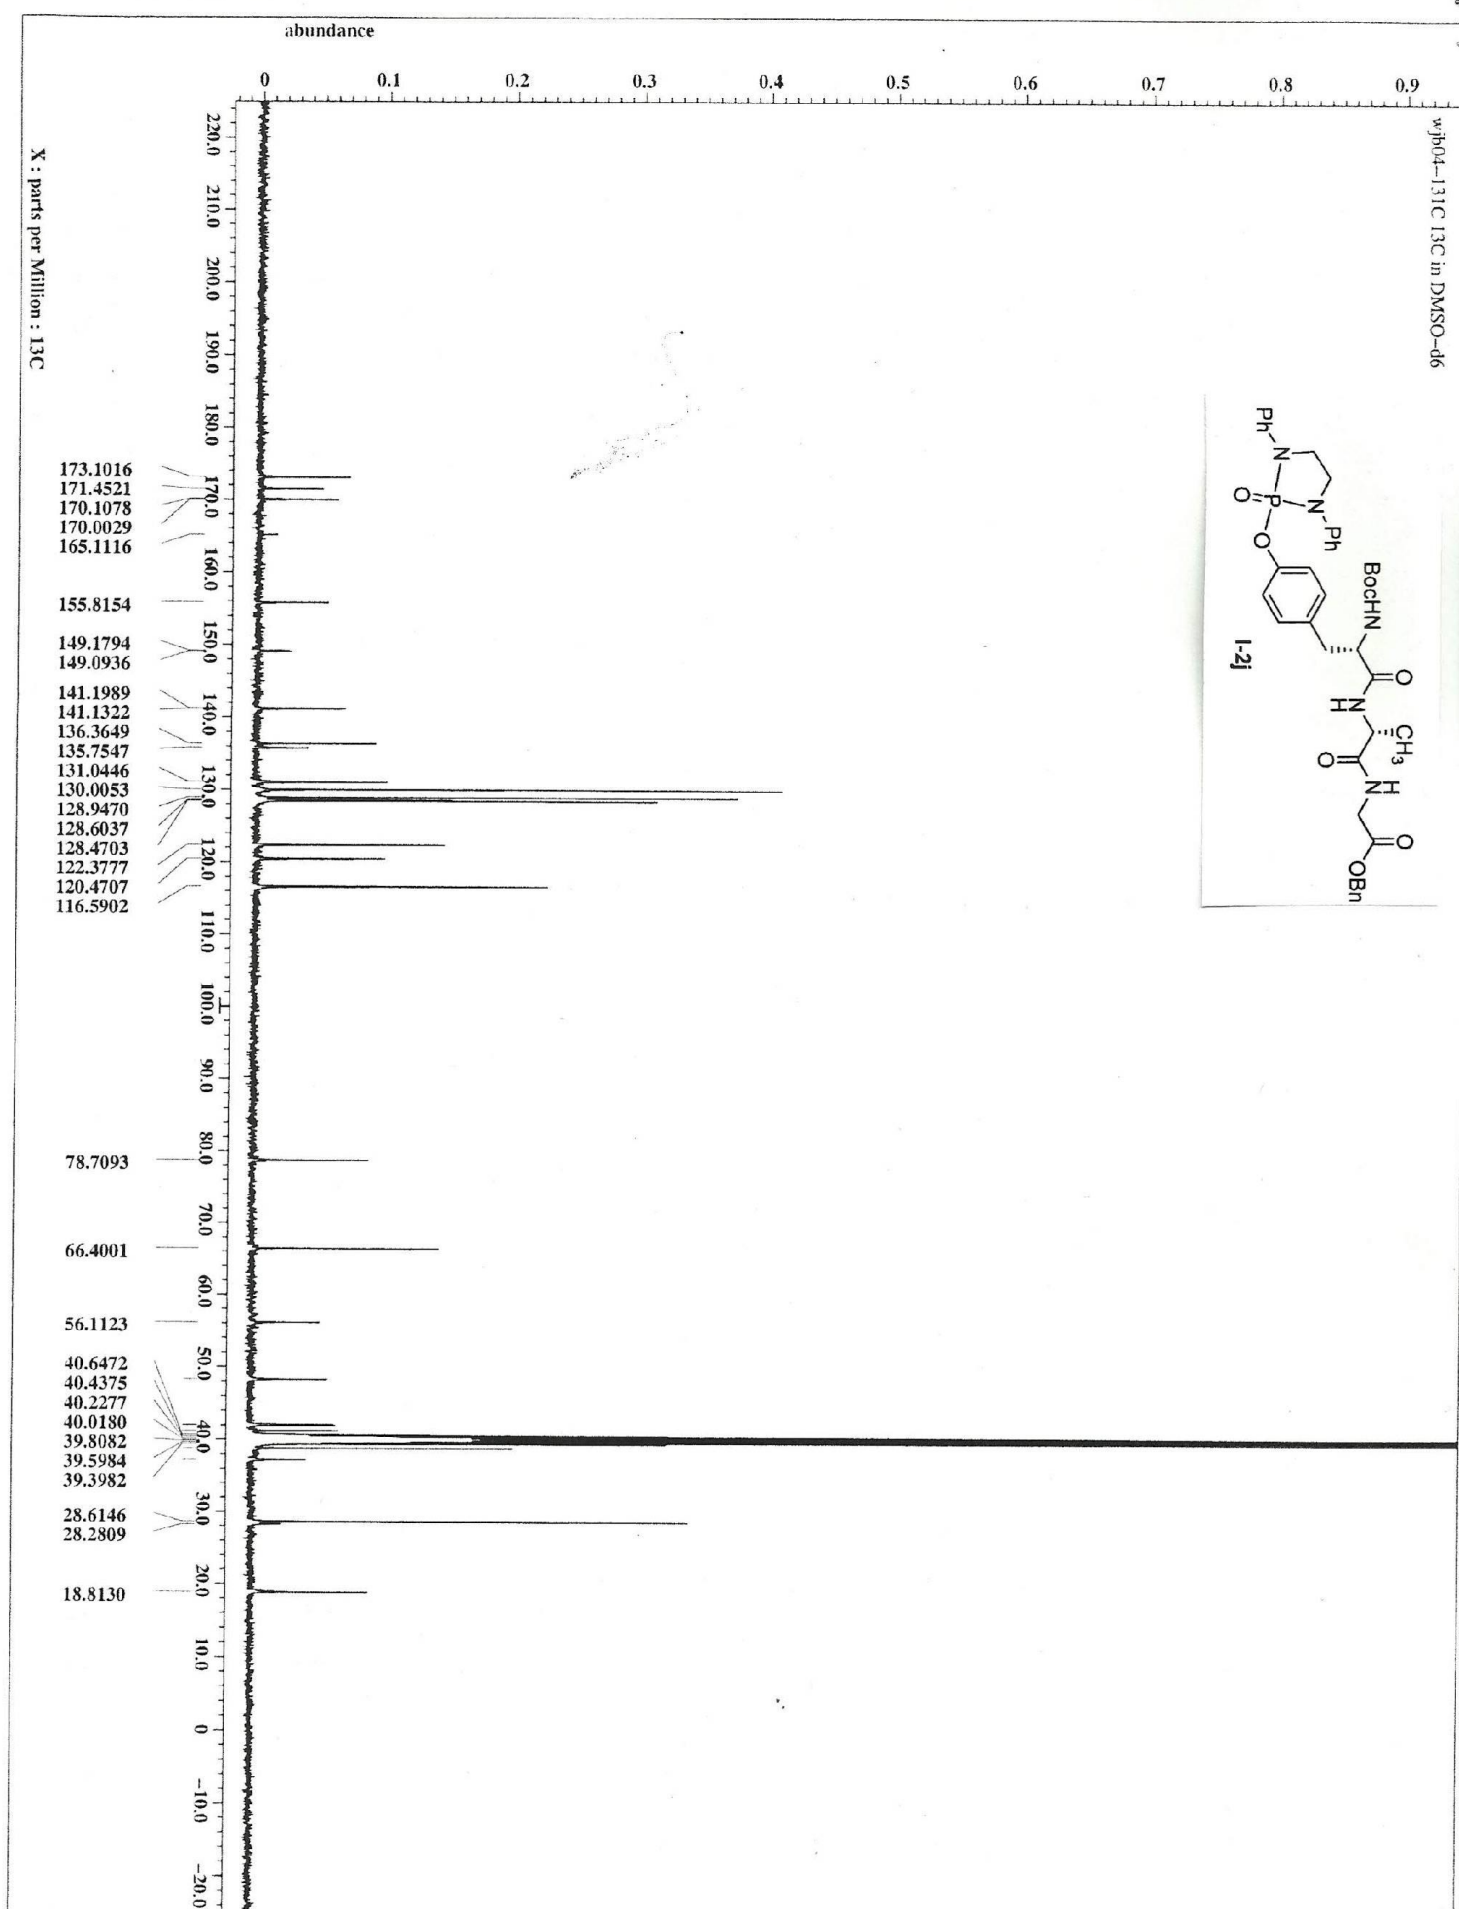

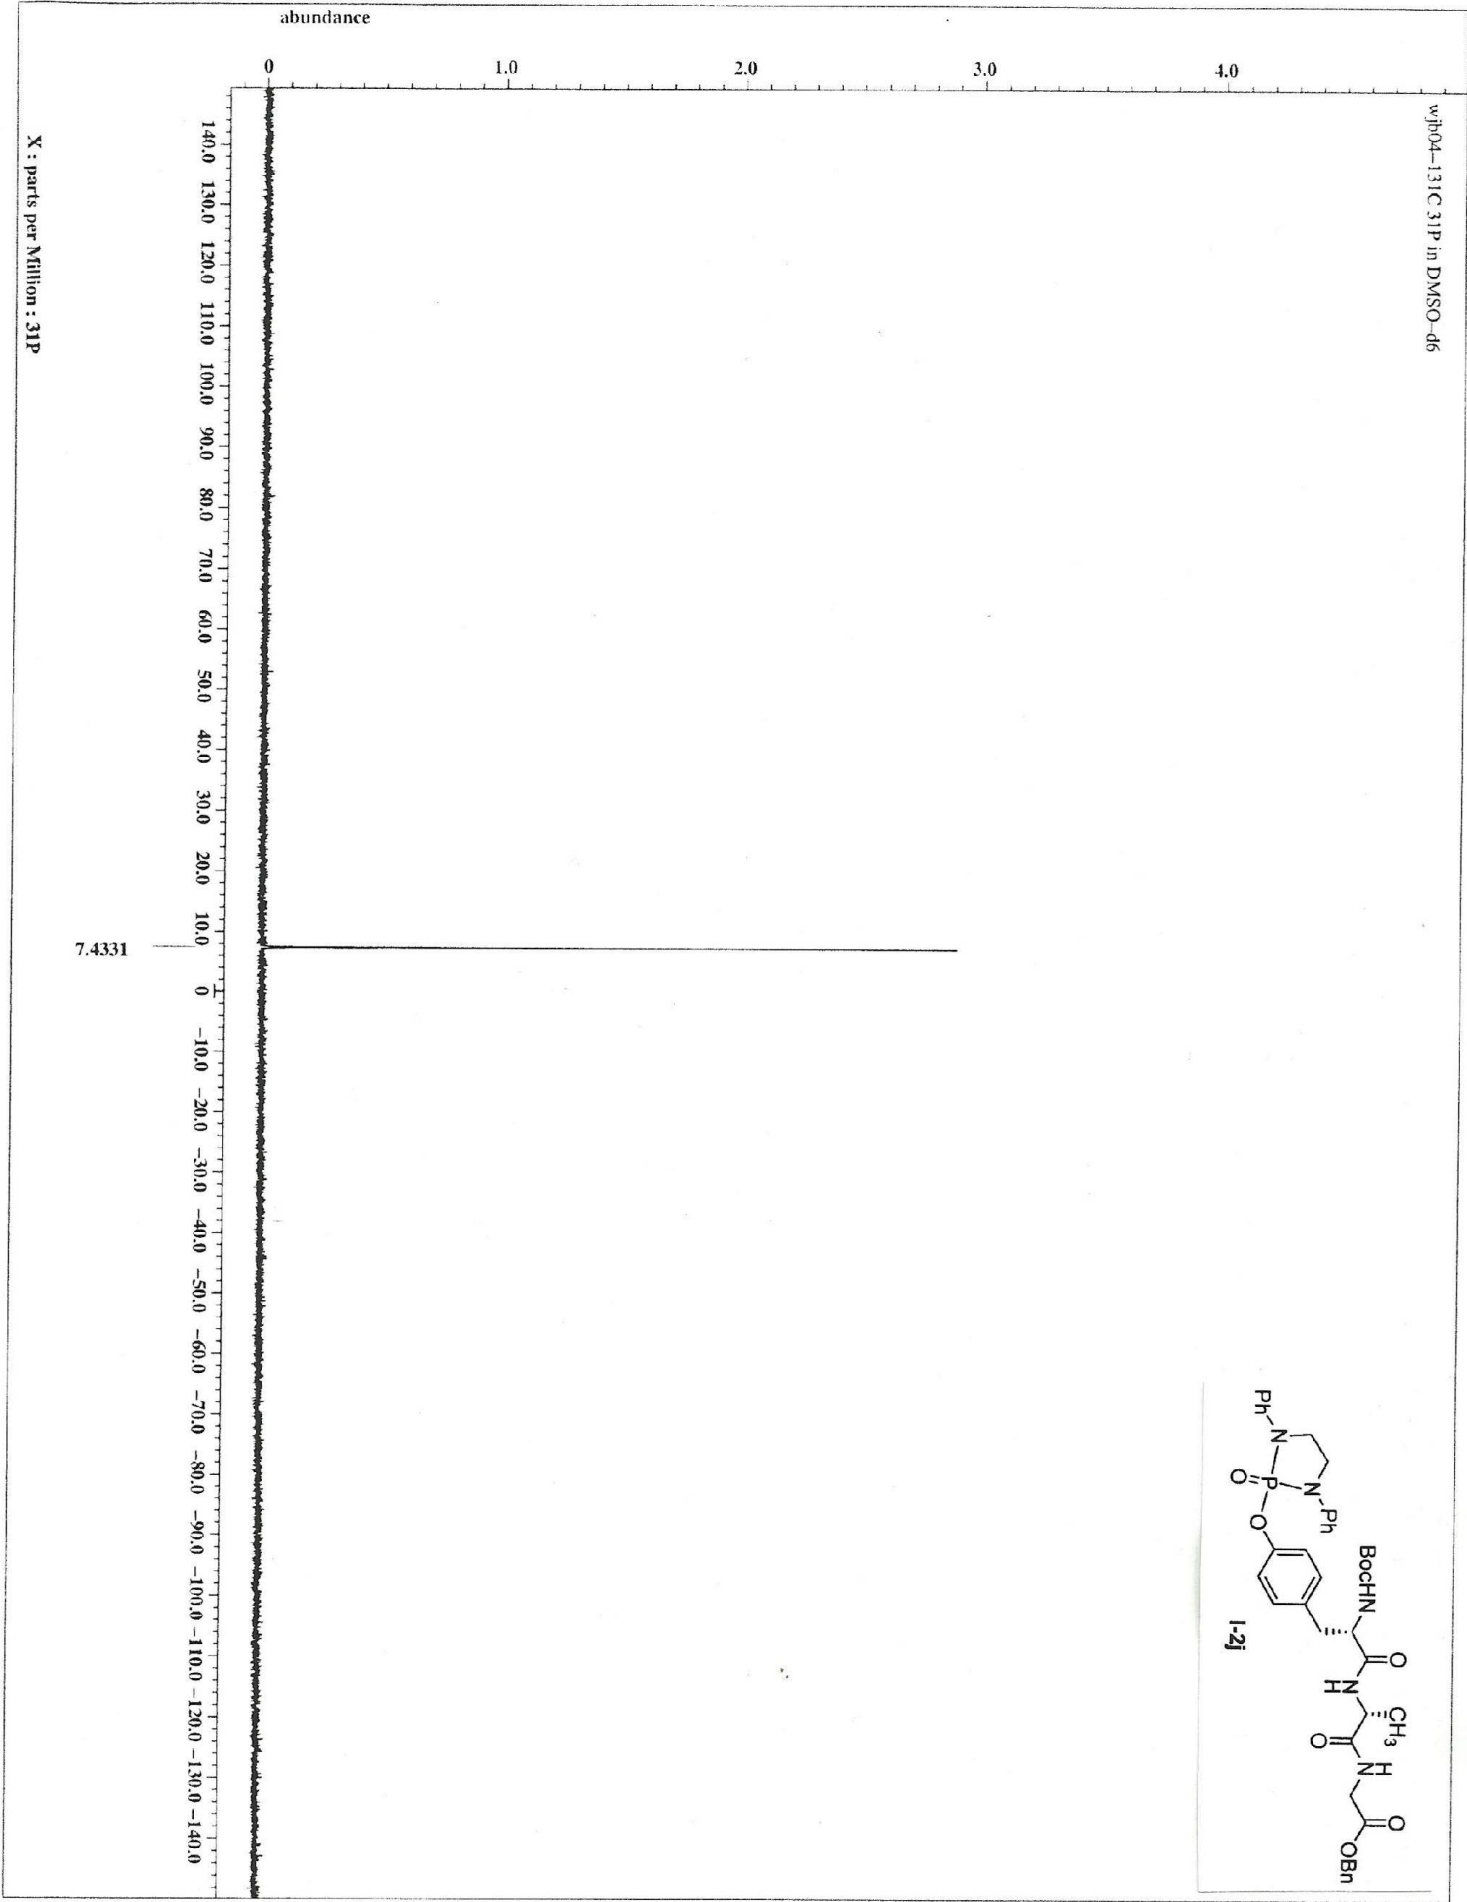

W04-131\_12042012\_01#95 RT: 1.23 AV: 1 NL: 2.69E6  
T: FTMS + p ESI Full ms [150.00-2000.00]

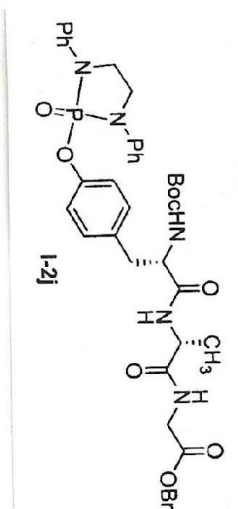

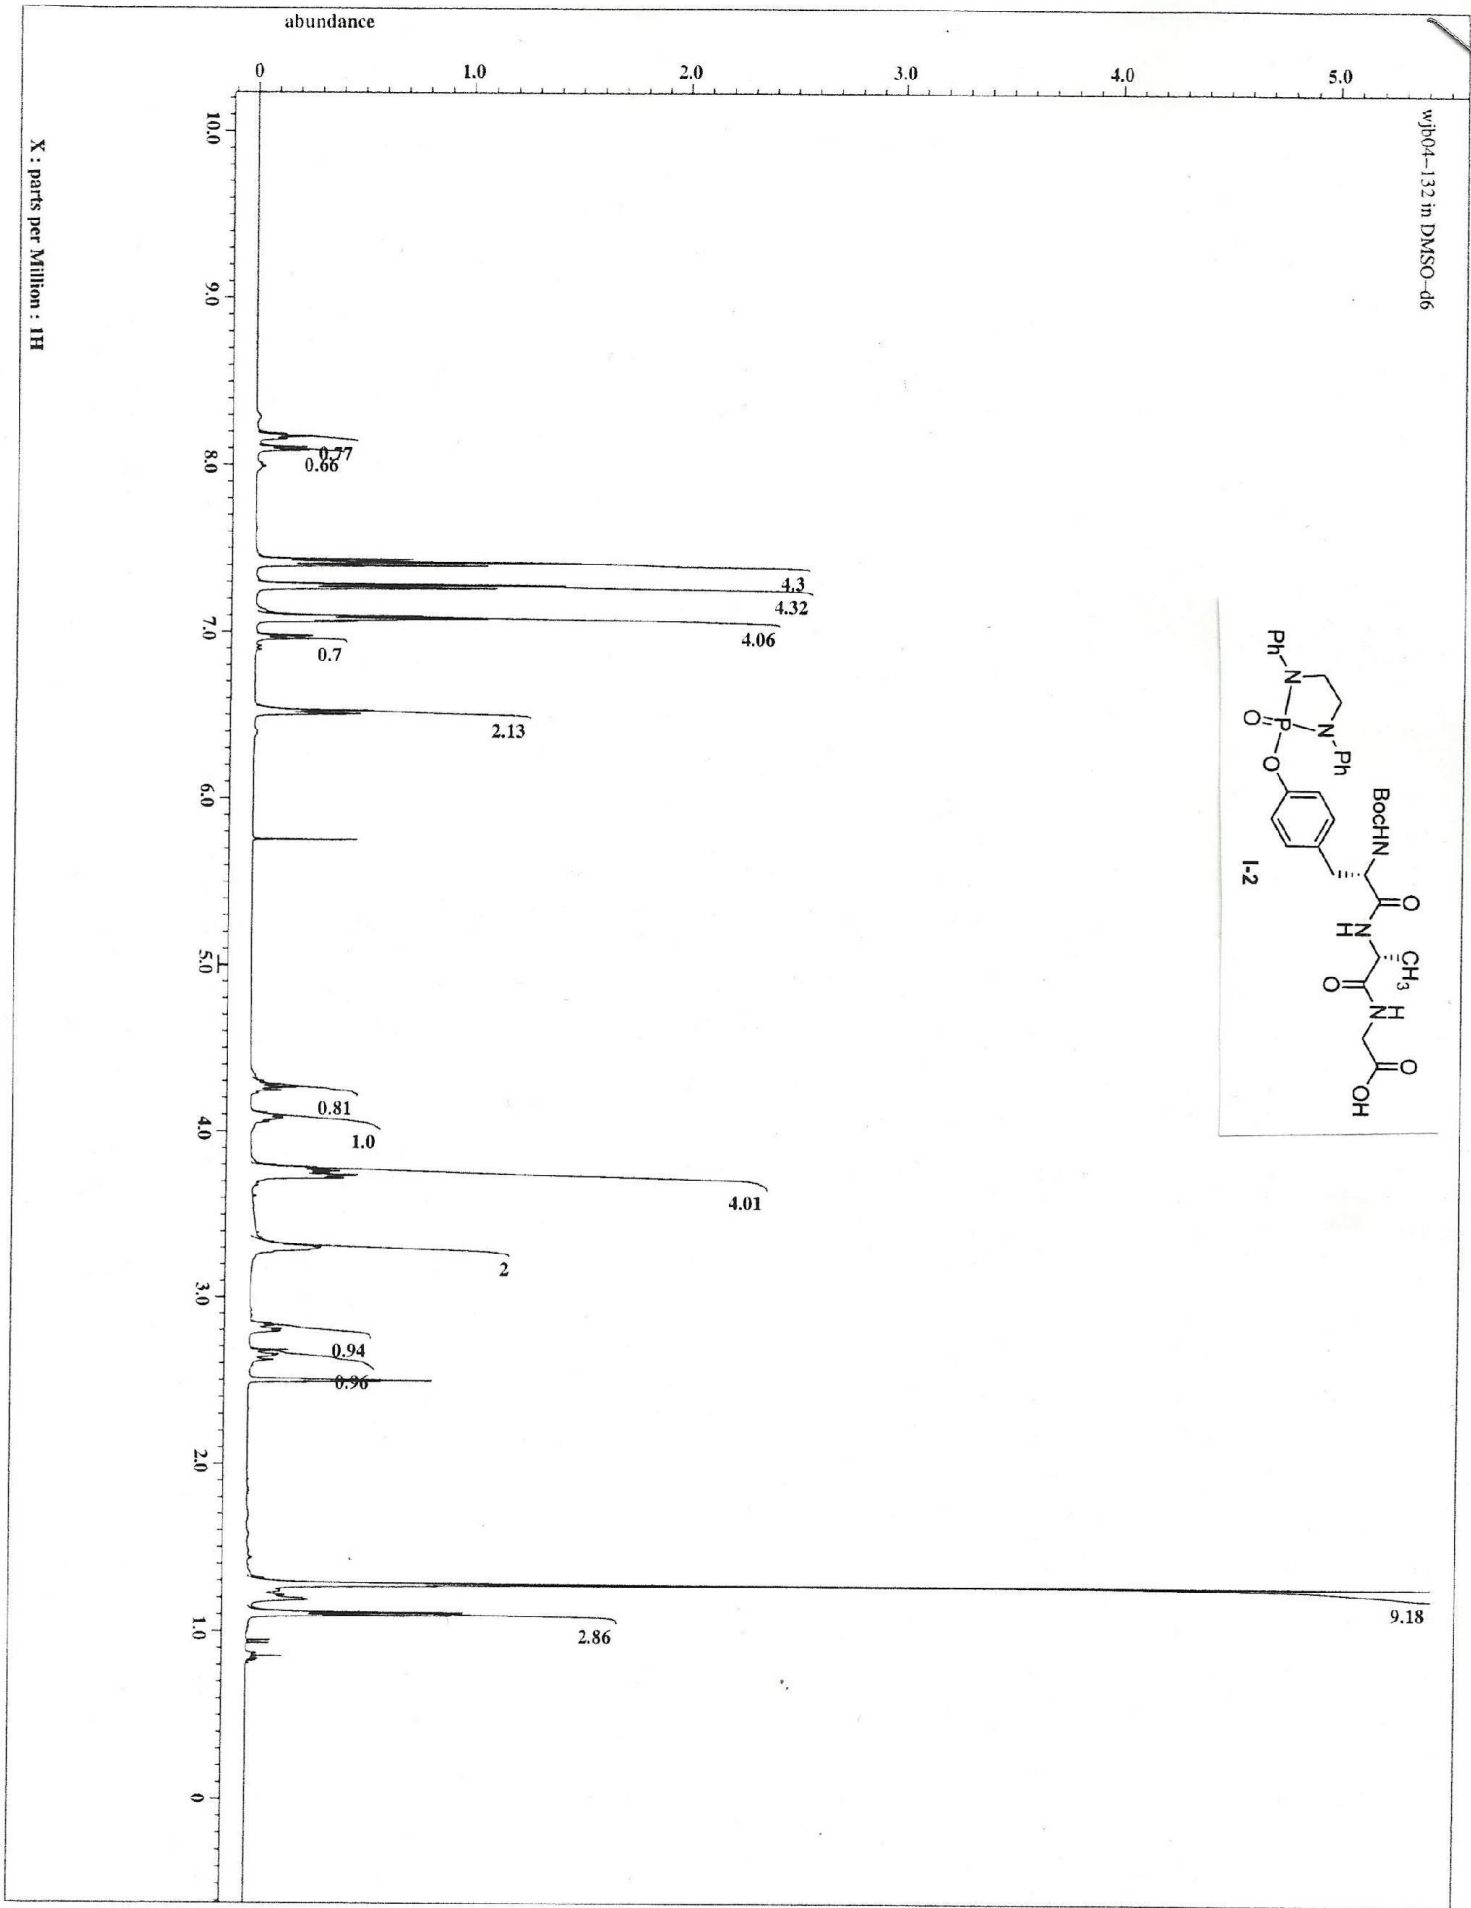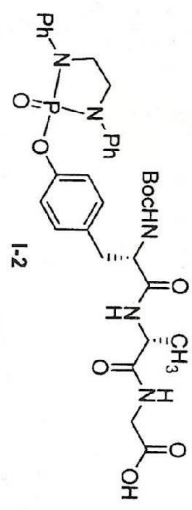



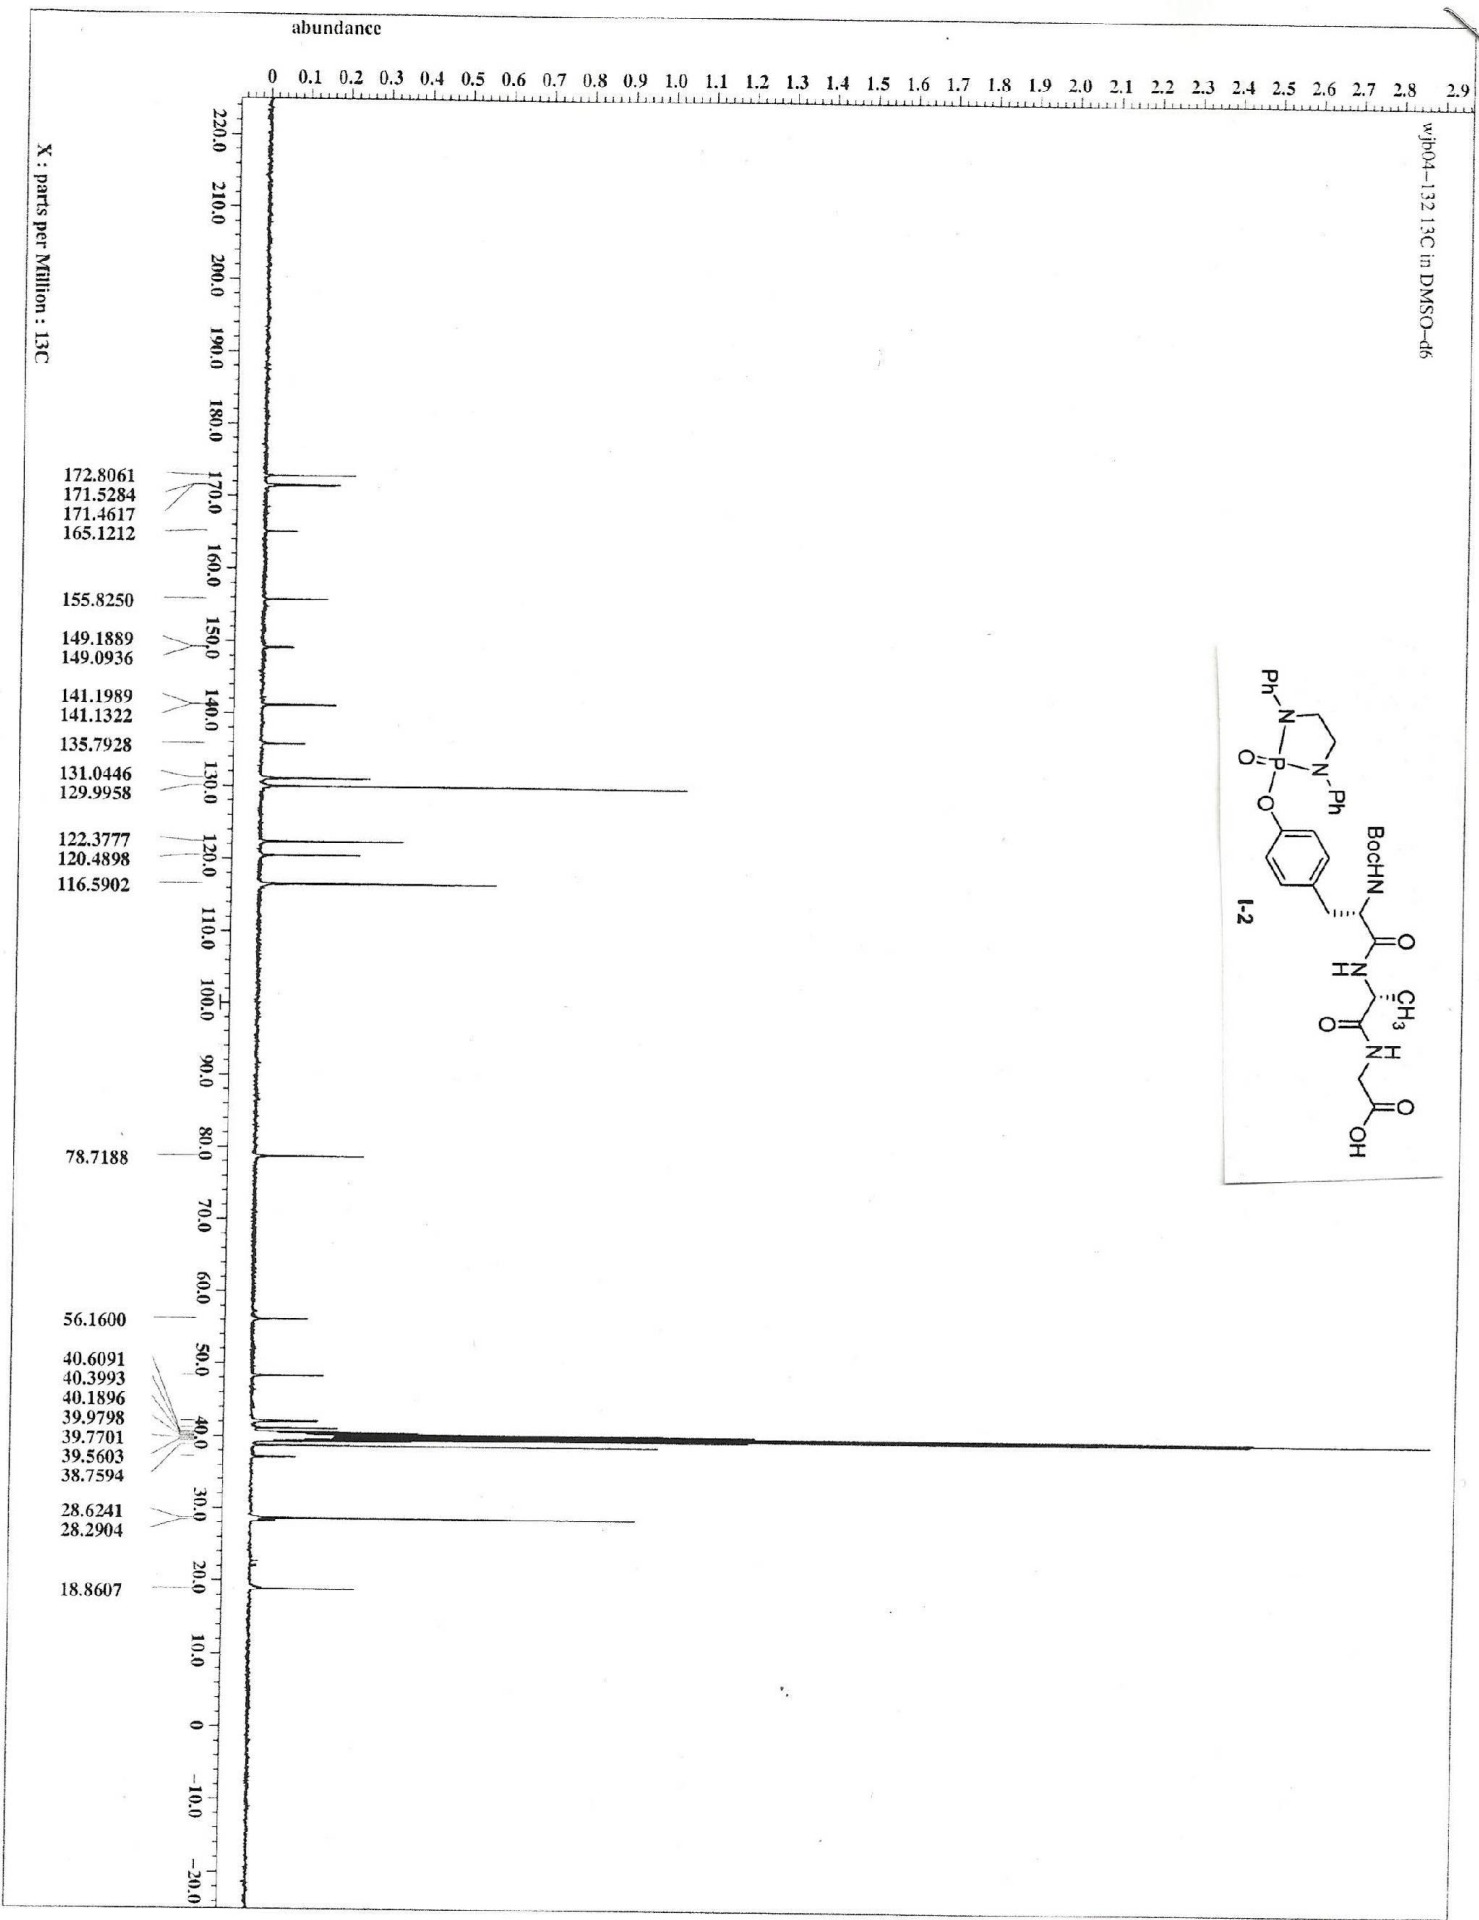



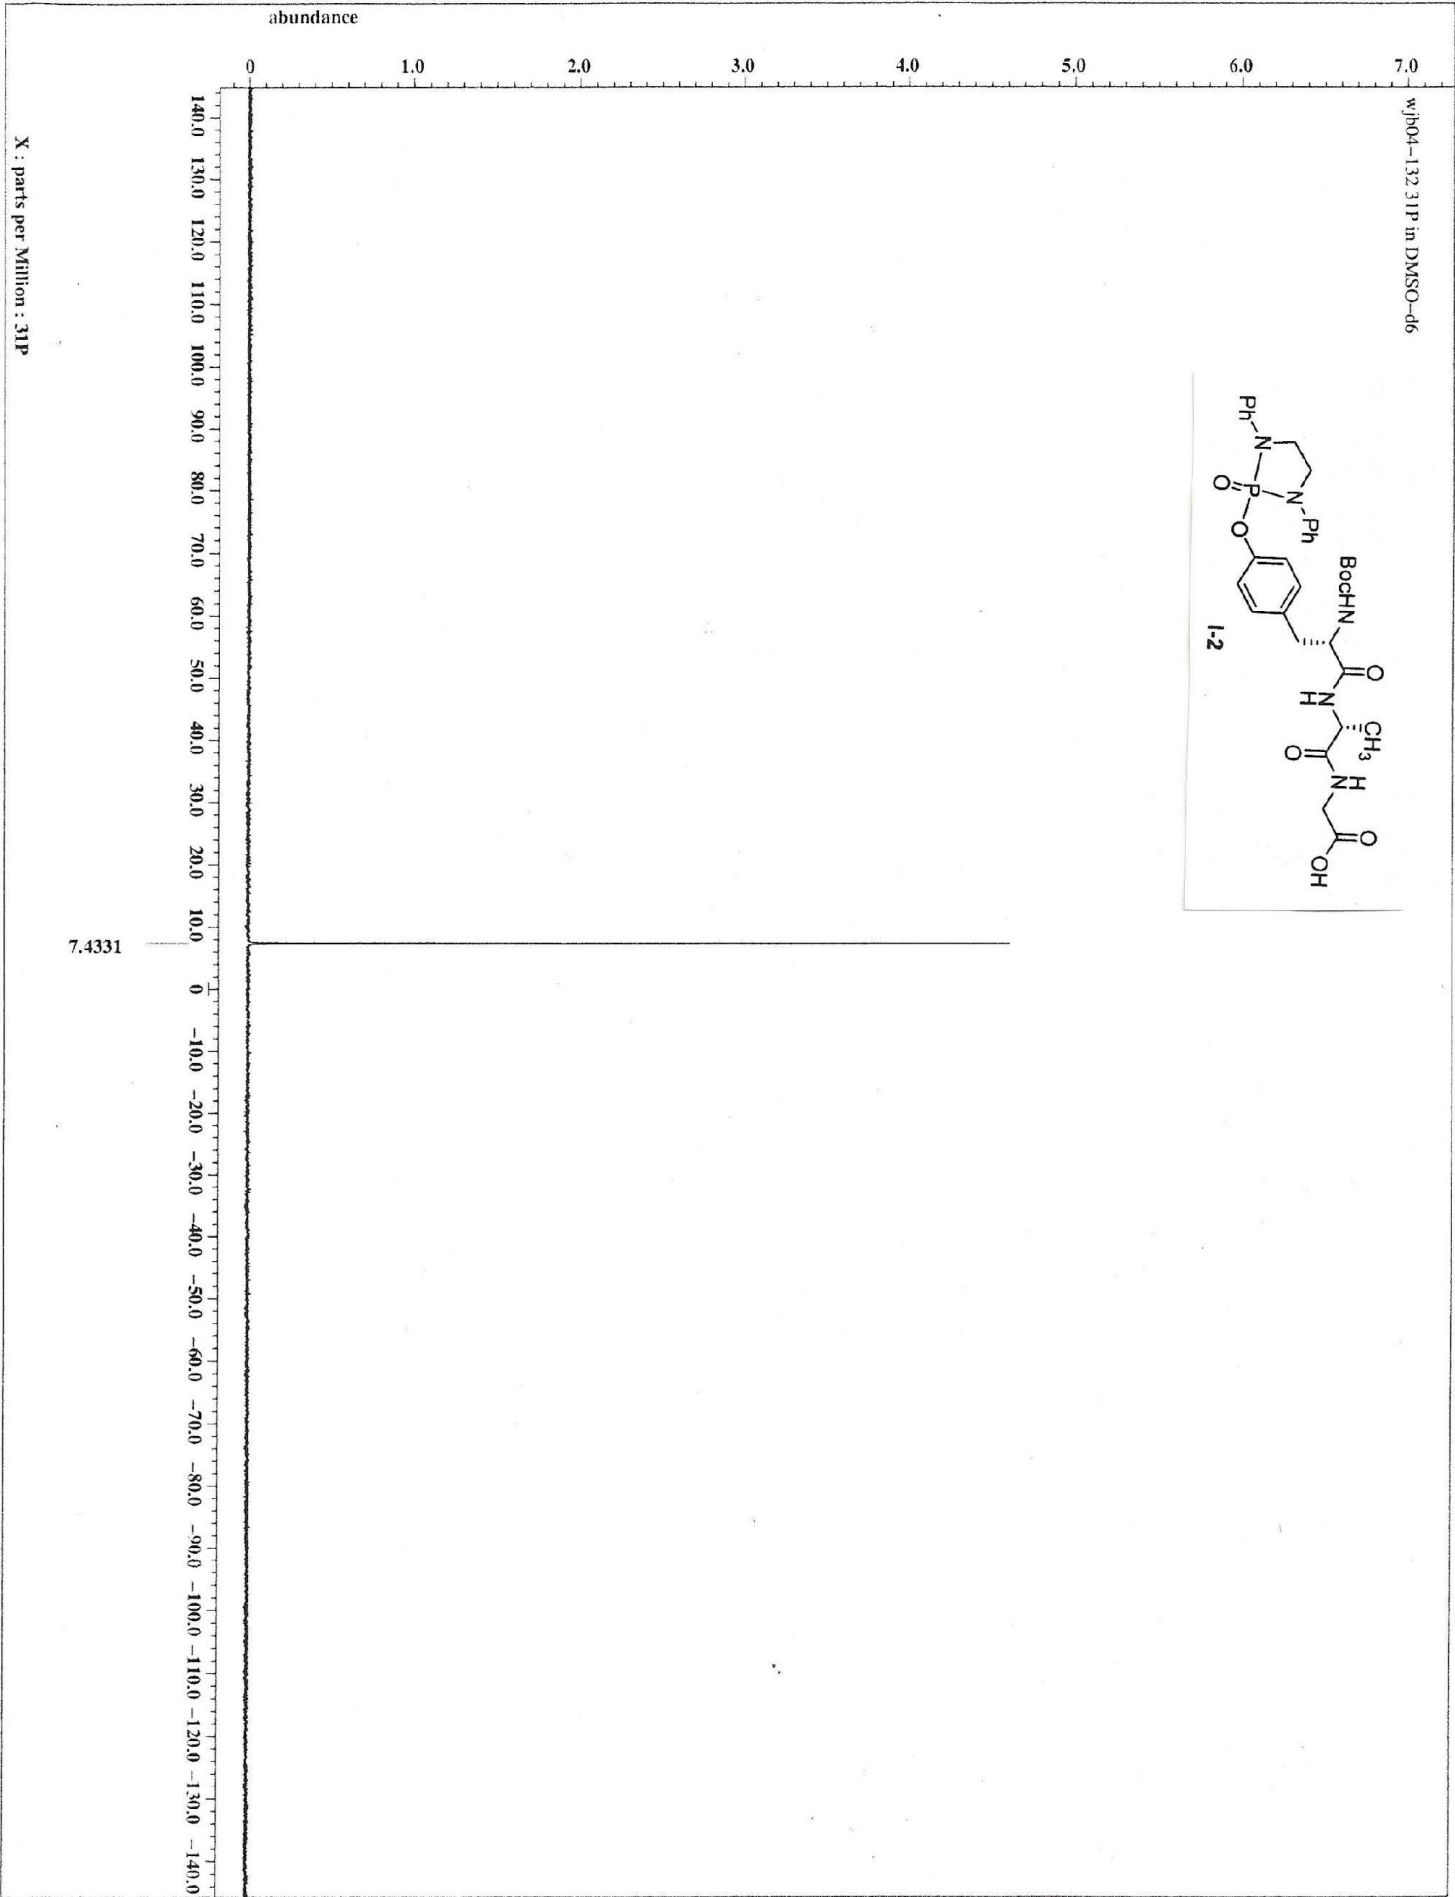

G:\MS Facility\GL\W04-132\_12042012\_01

12/4/2012 3:45:42 PM

W04-132\_12042012\_01 #62 RT: 0.52 AV: 1 NL: 1.32E6  
T: FTMS + p ESI Full ms [150.00-2000.00]

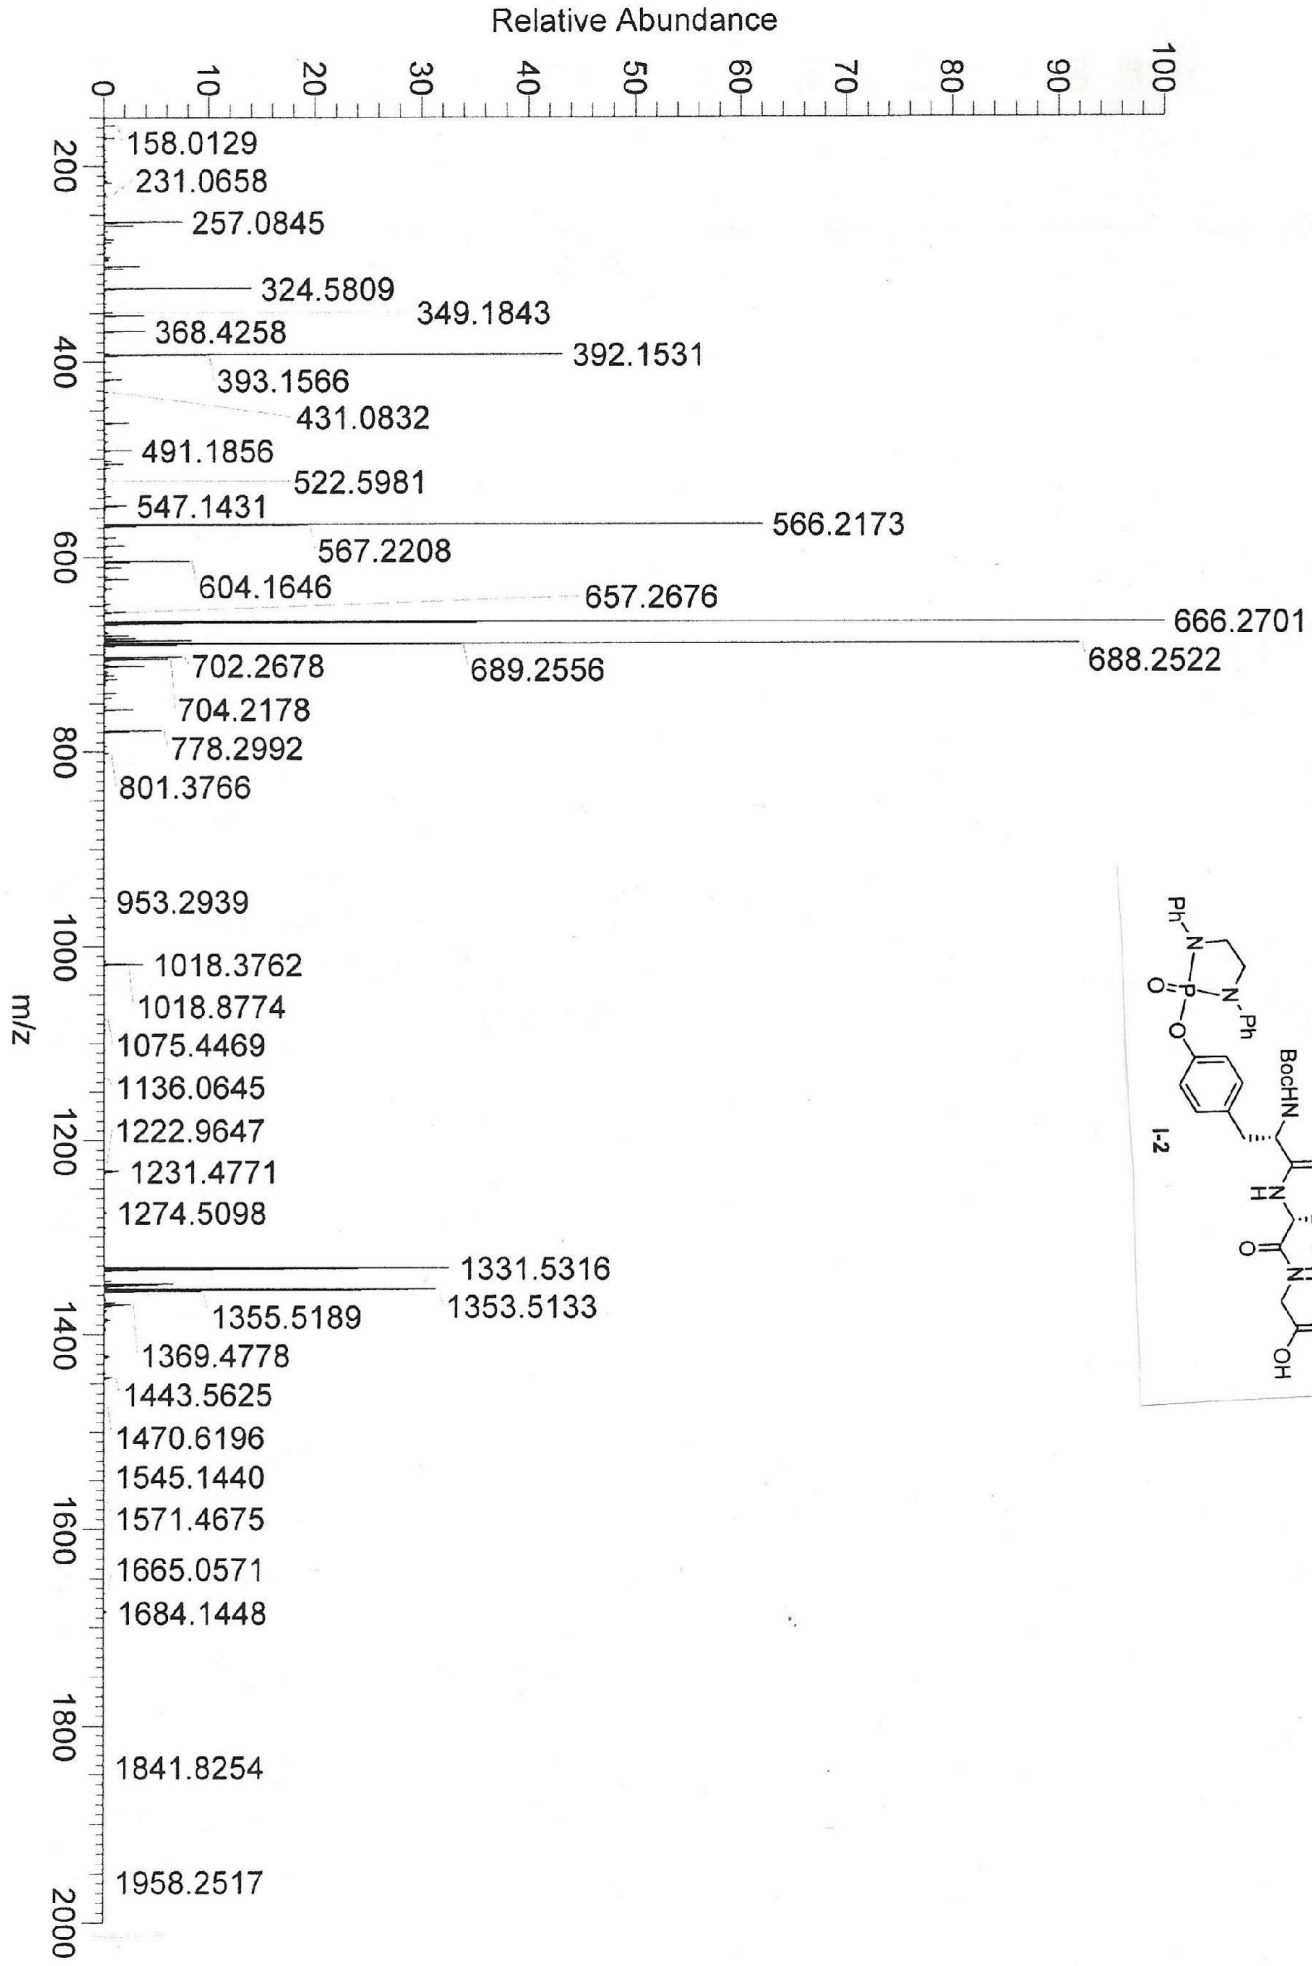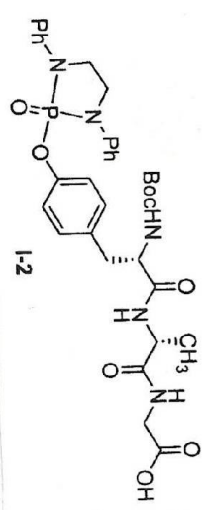

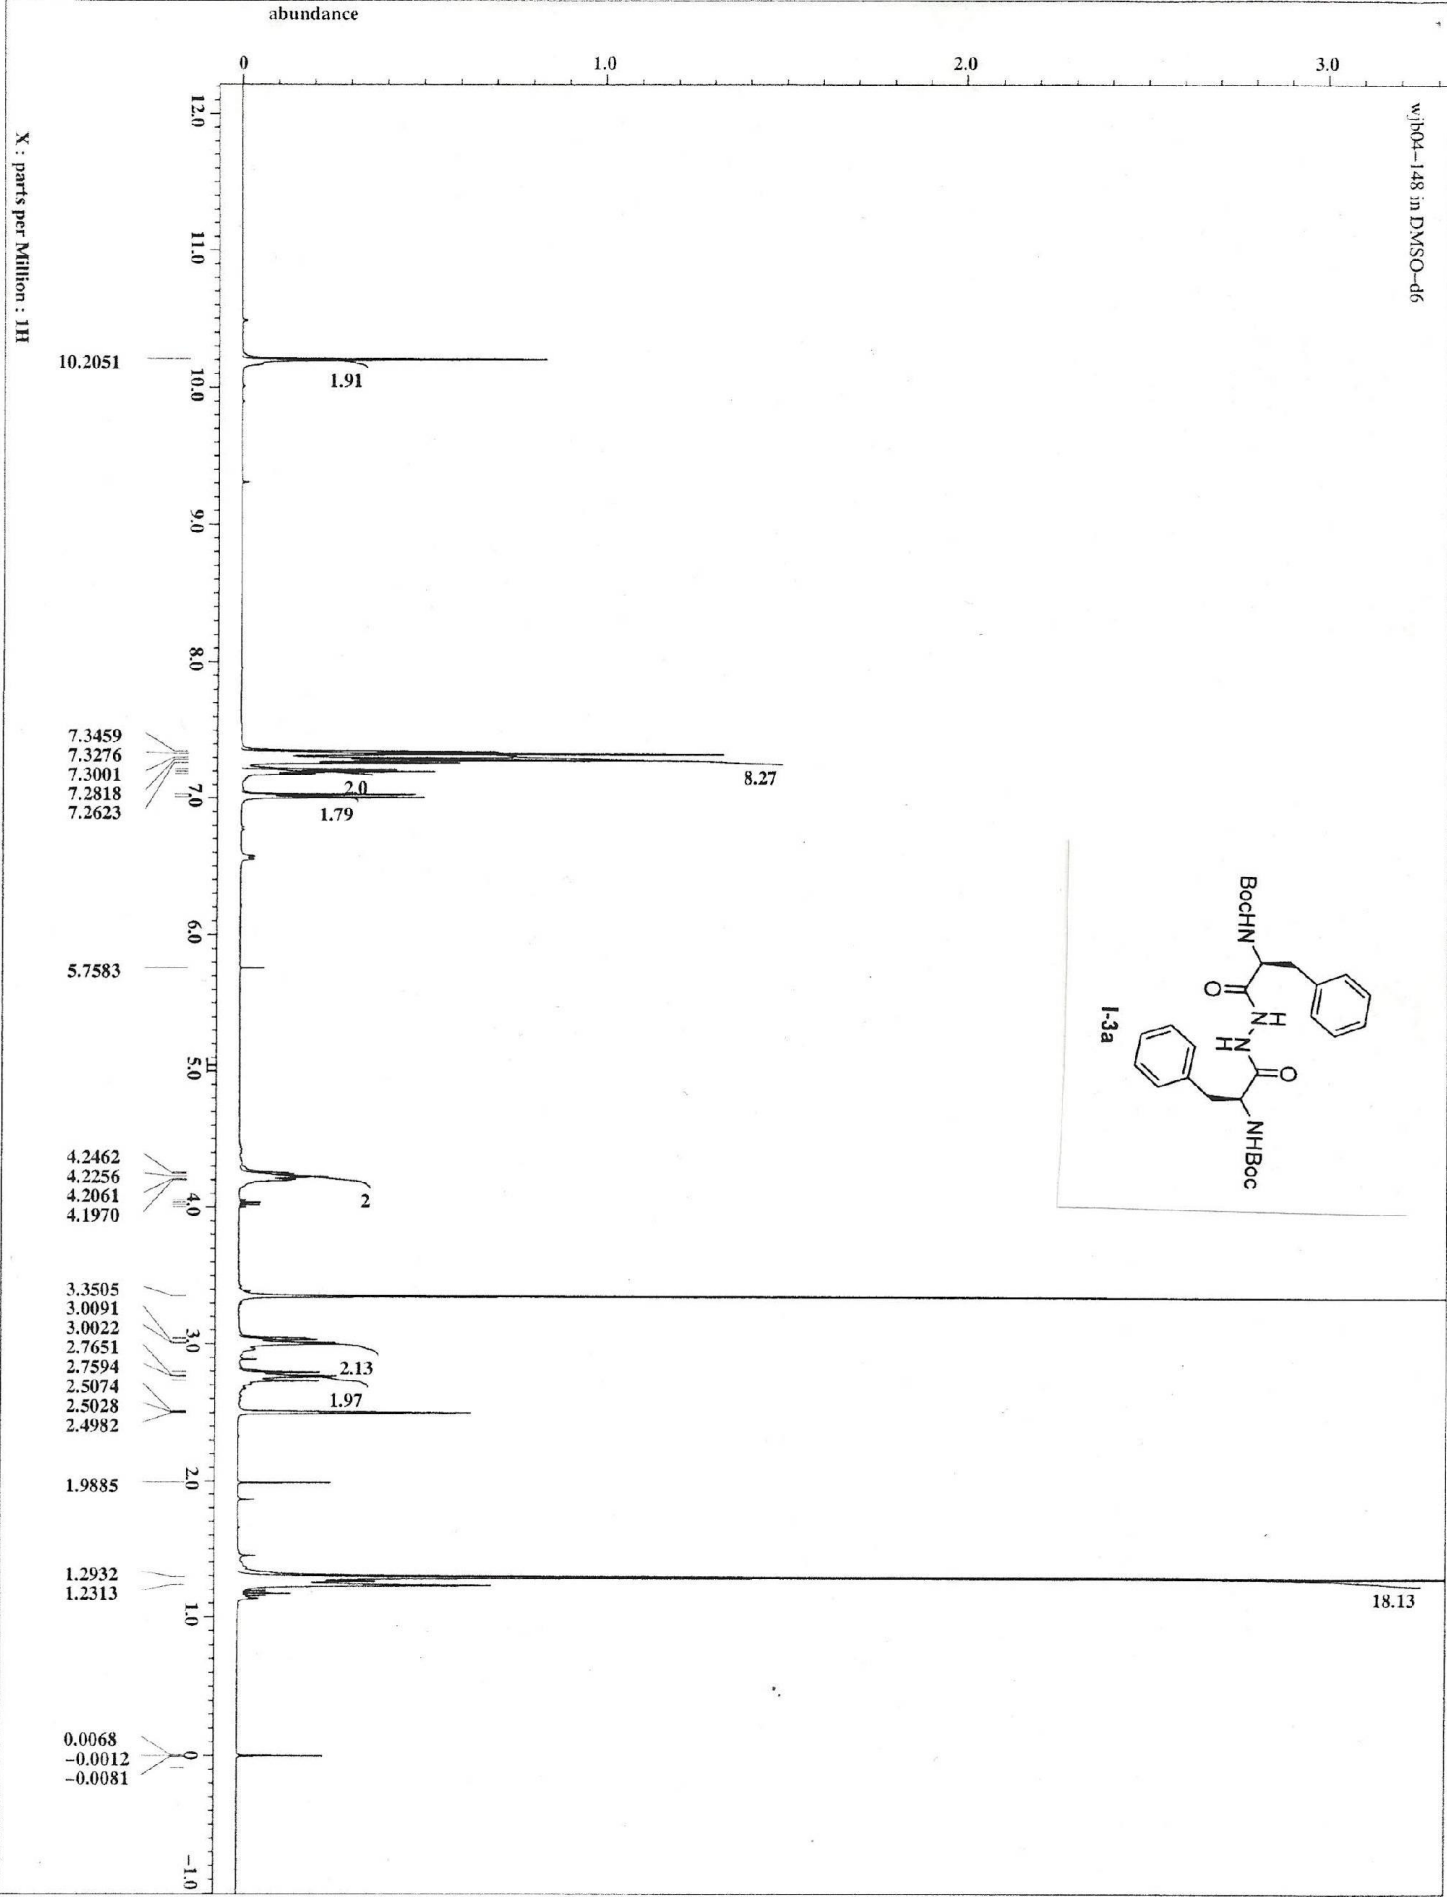

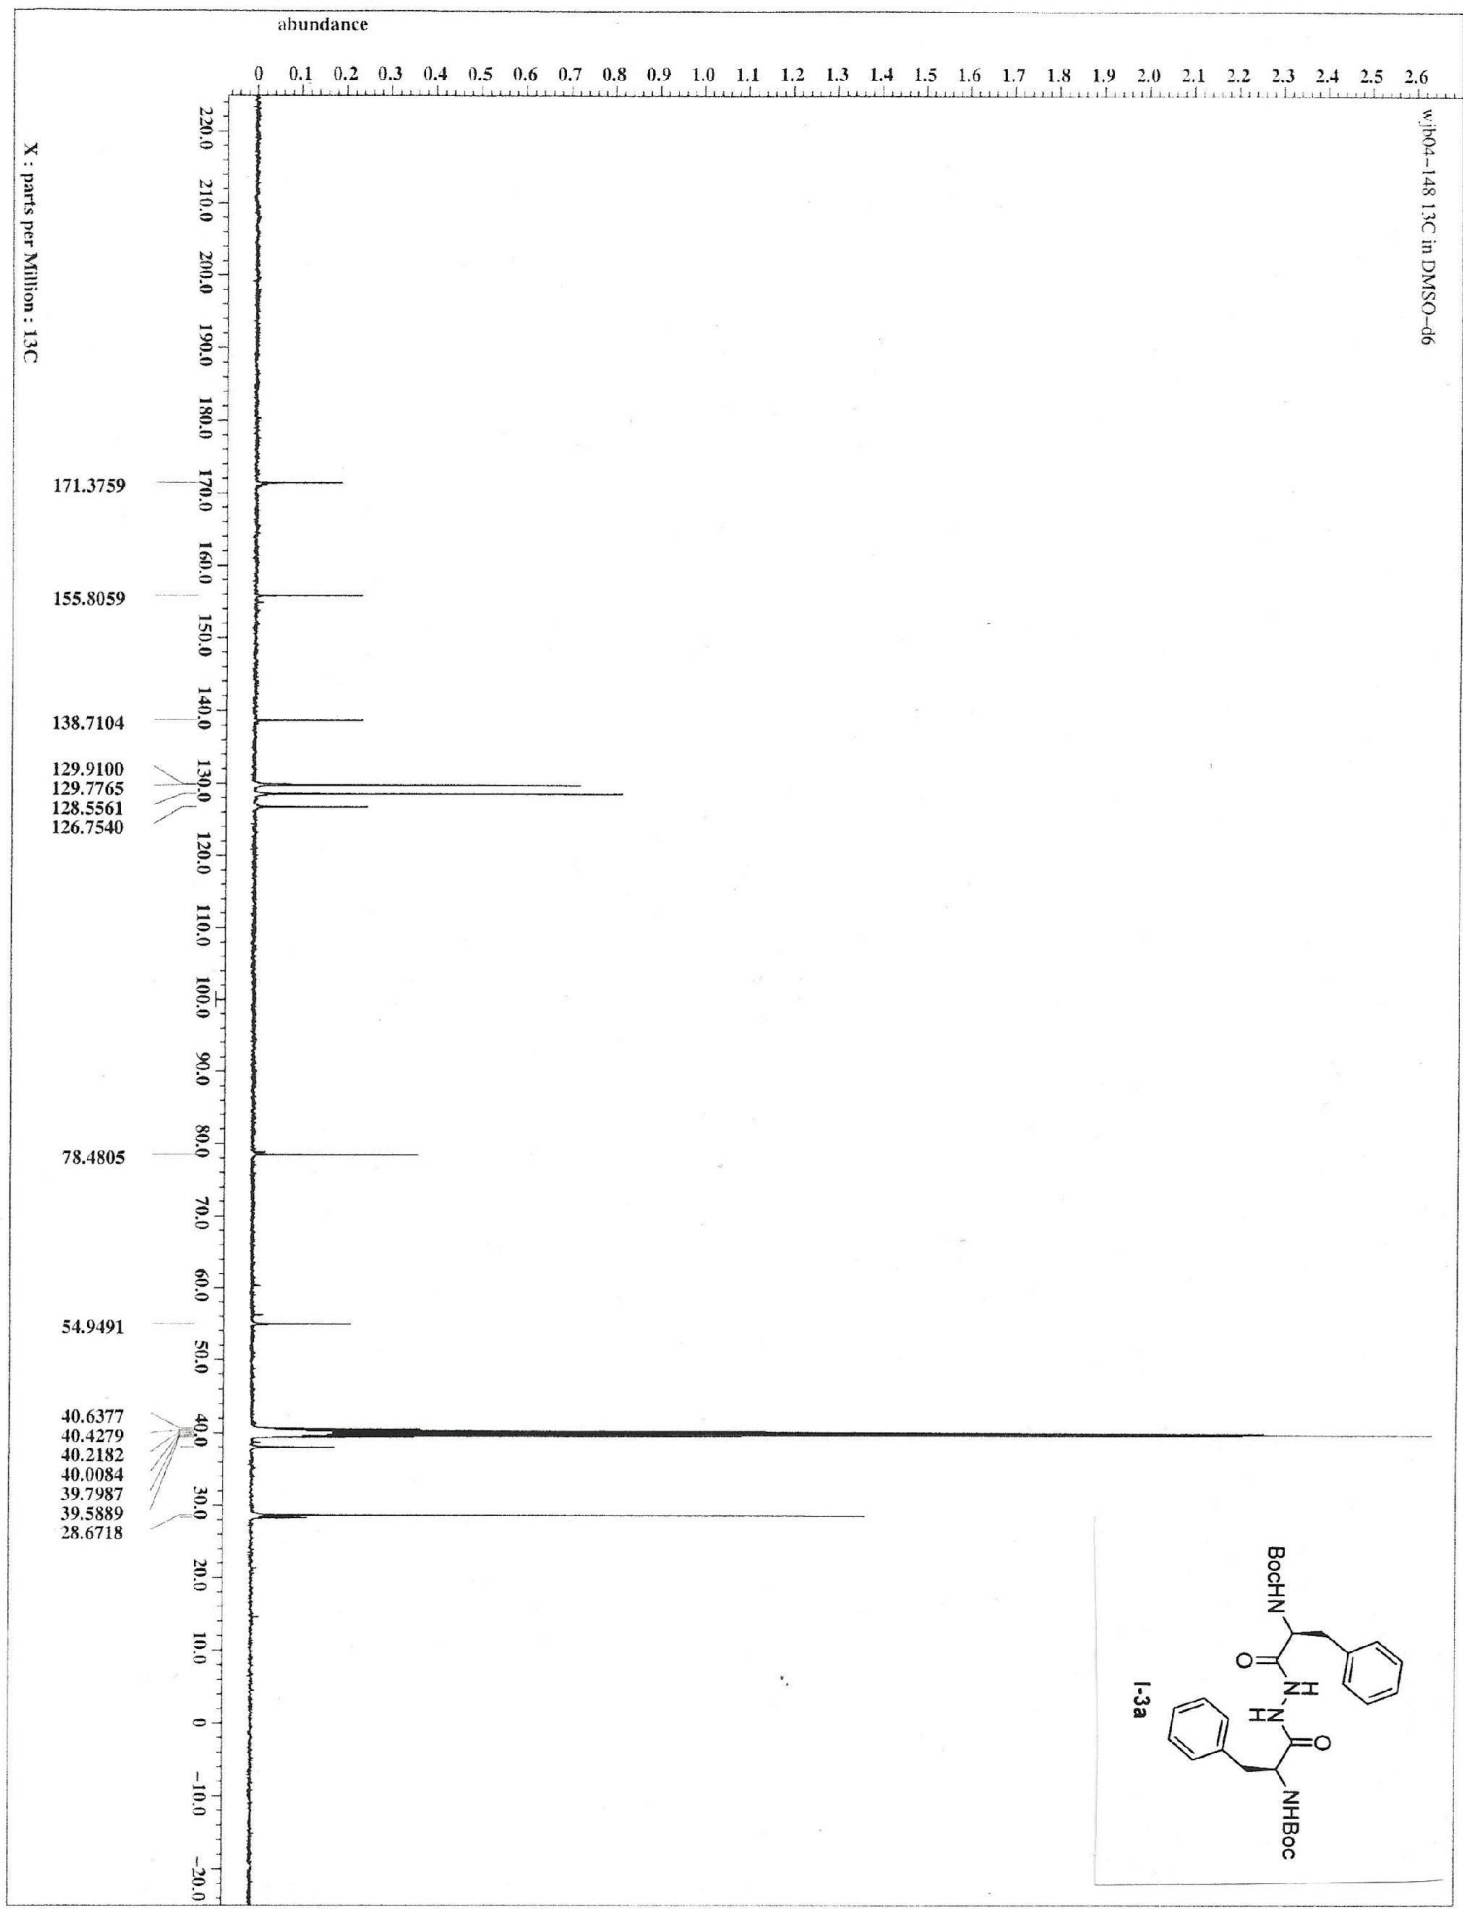

W04-148

#161 RT: 0.585 AV: 10 IT: 10.000 ST: 0.20 US: 1 NL: 9.65E2  
F: ITMS + p ESI Full ms [85.00-1300.00] Page 1 of 1

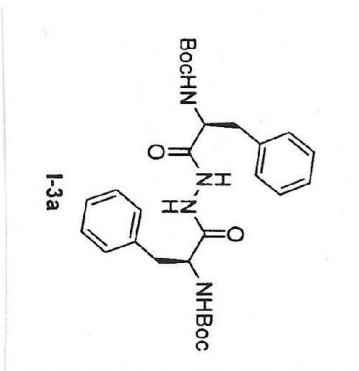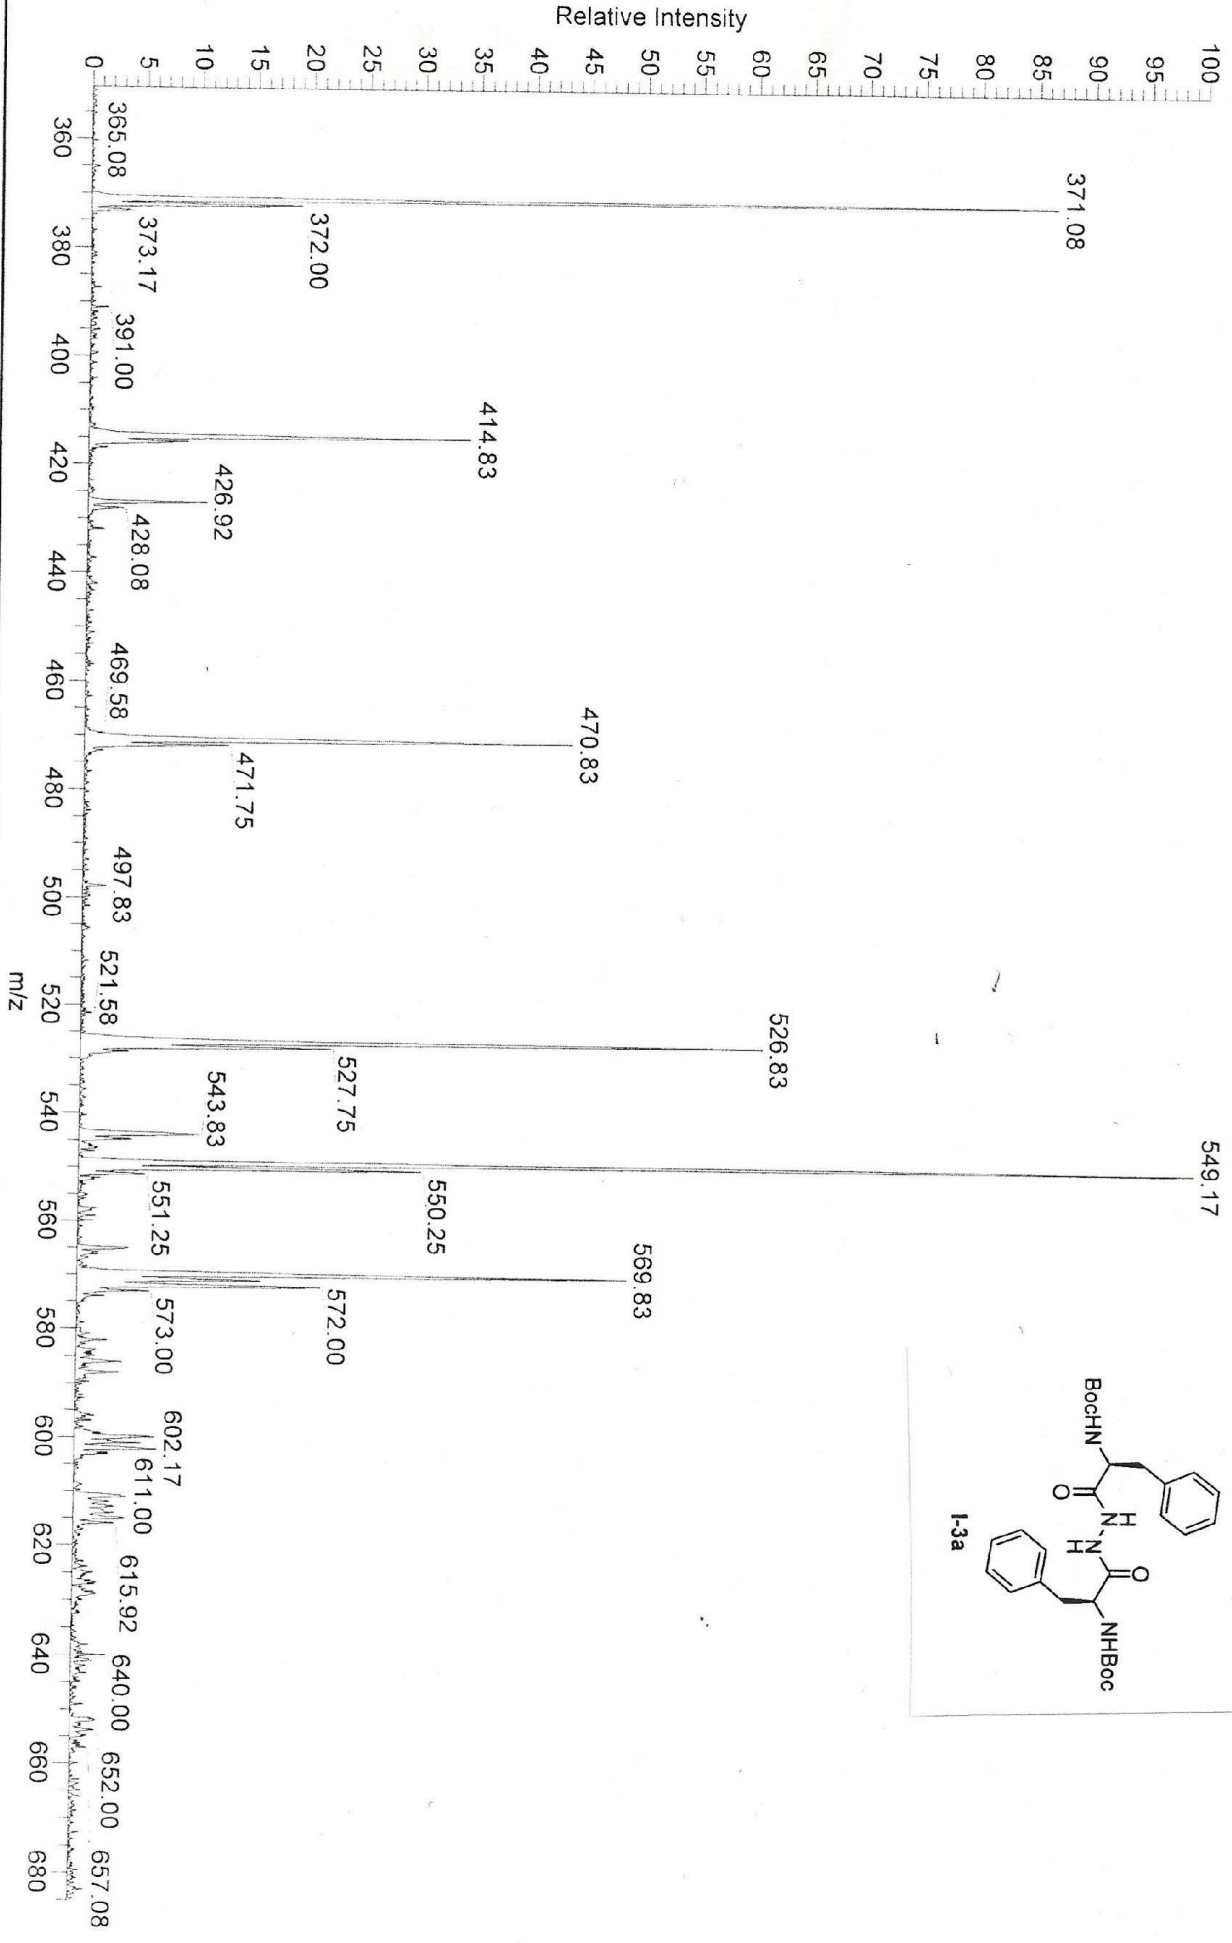

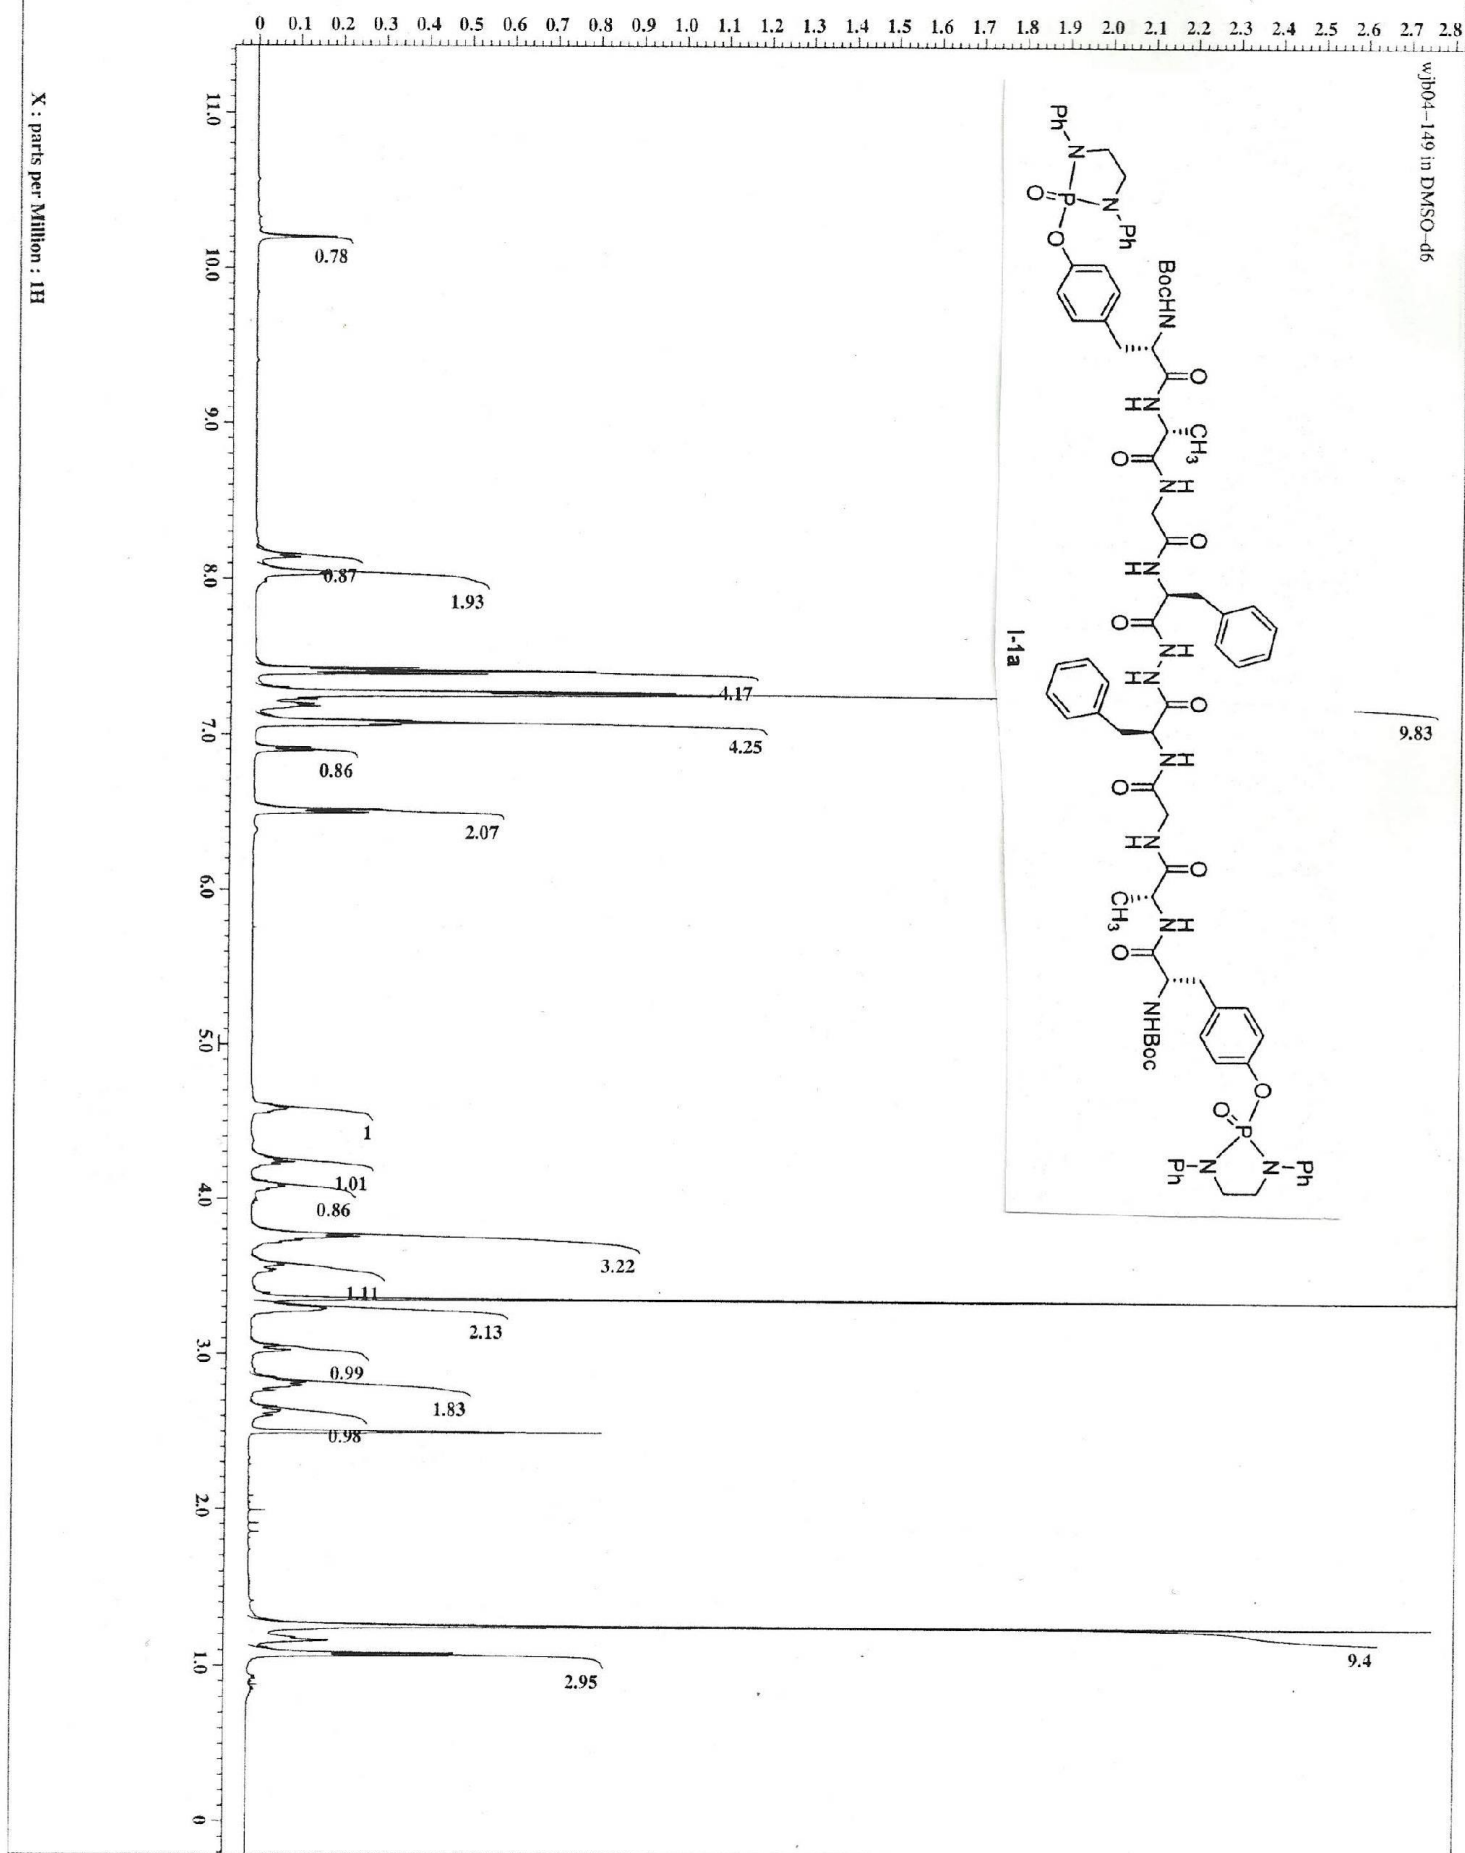



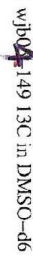



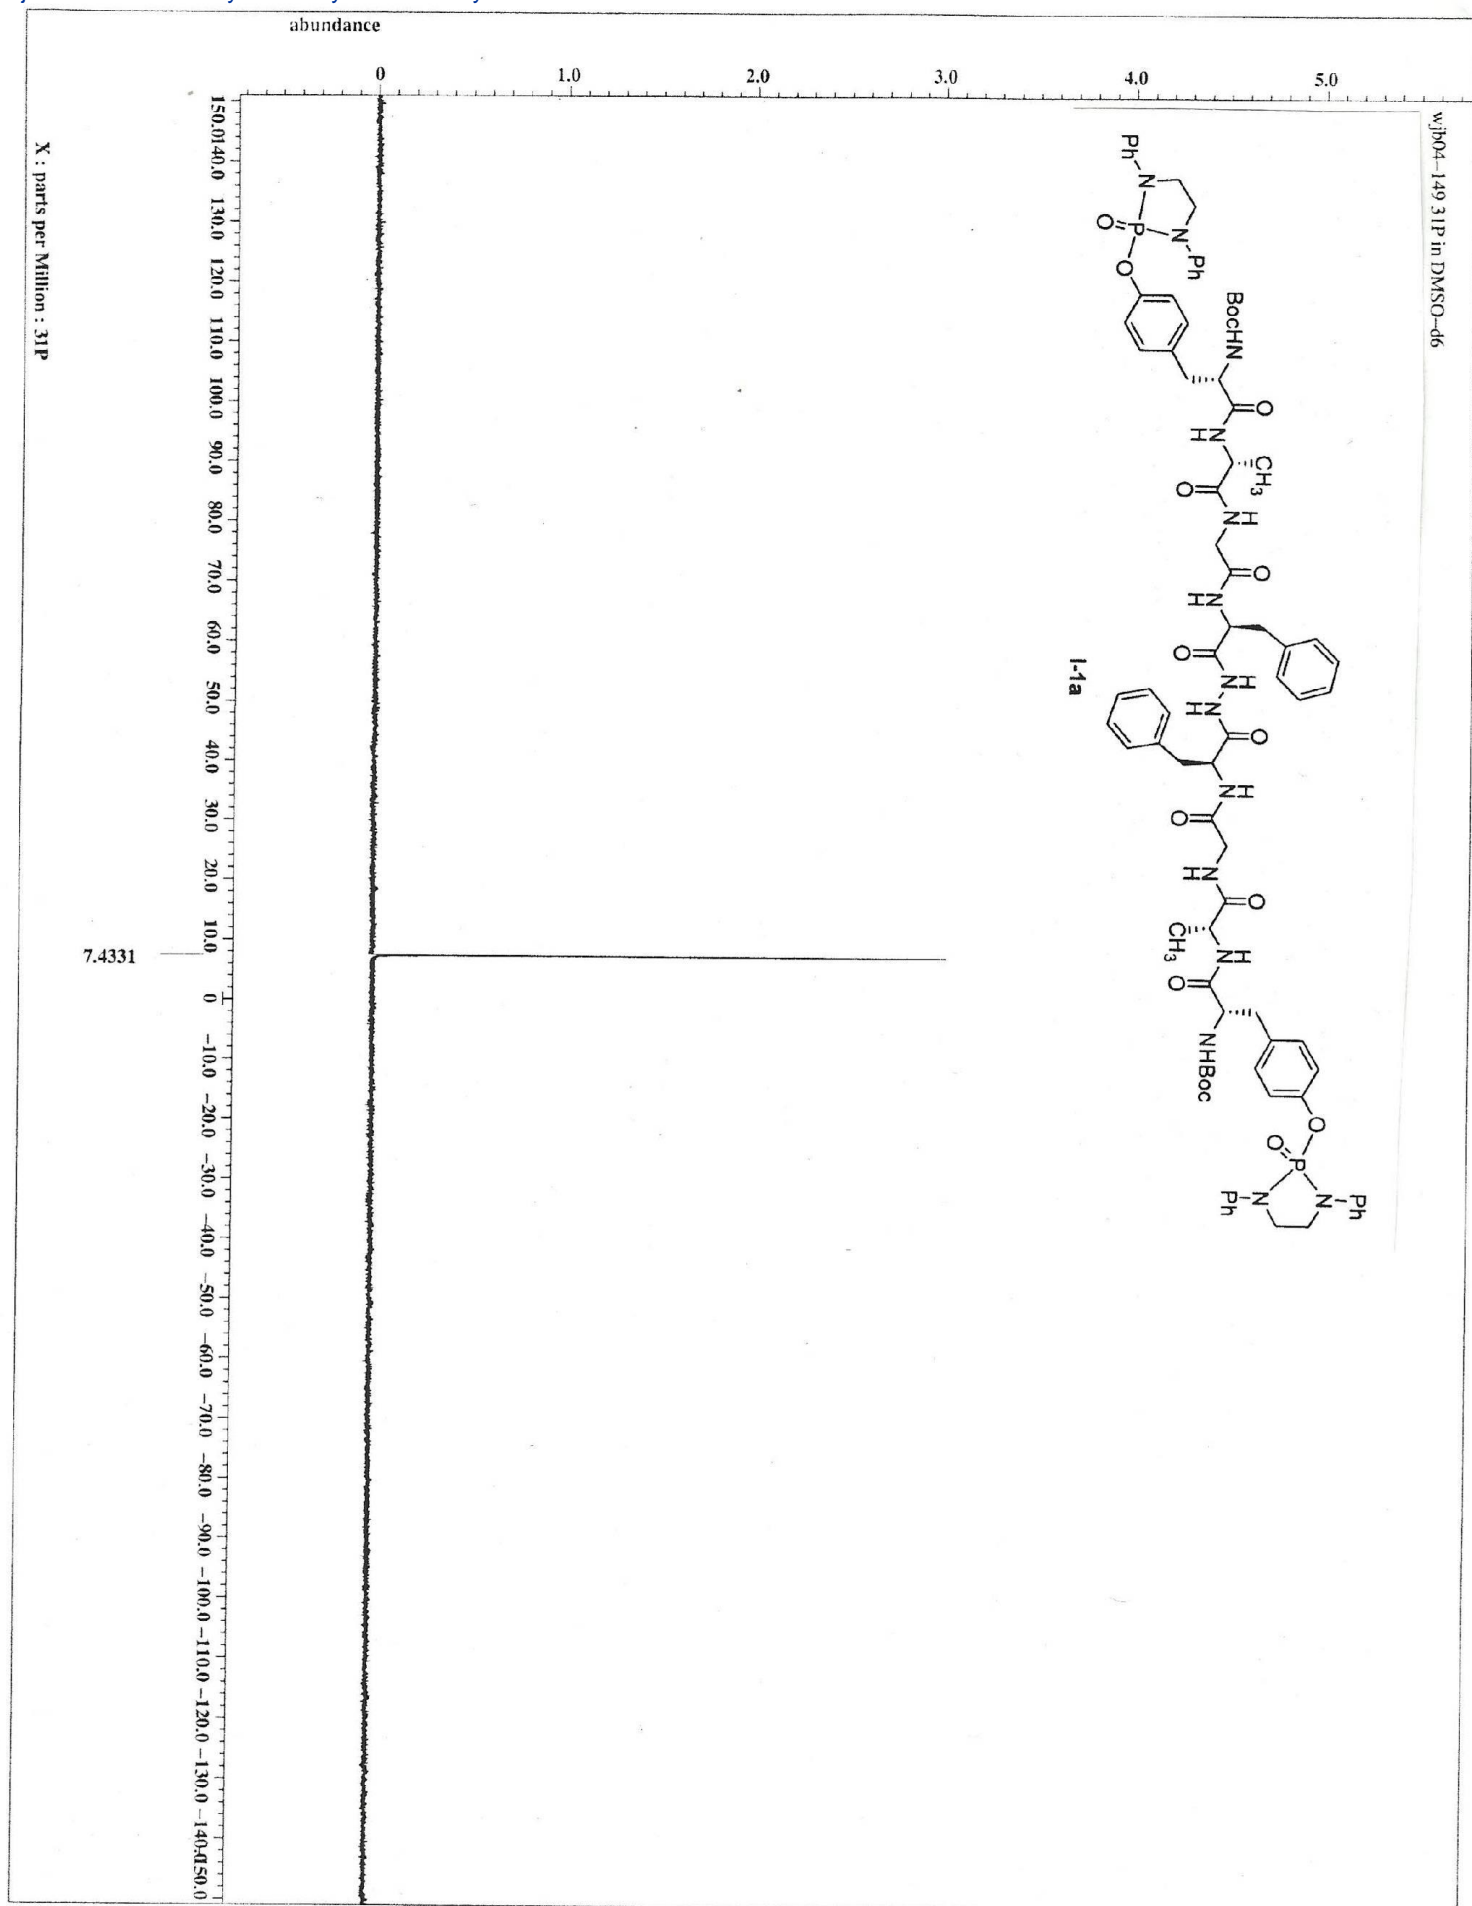

G:\MS Facility\GL\W04-149\_12042012\_01

12/4/2012 3:48:12 PM

W04-149\_12042012\_01 #5 RT: 0.04 AV: 1 NL: 7.25E4  
T: FTMS + p ESI Full ms [150.00-2000.00]

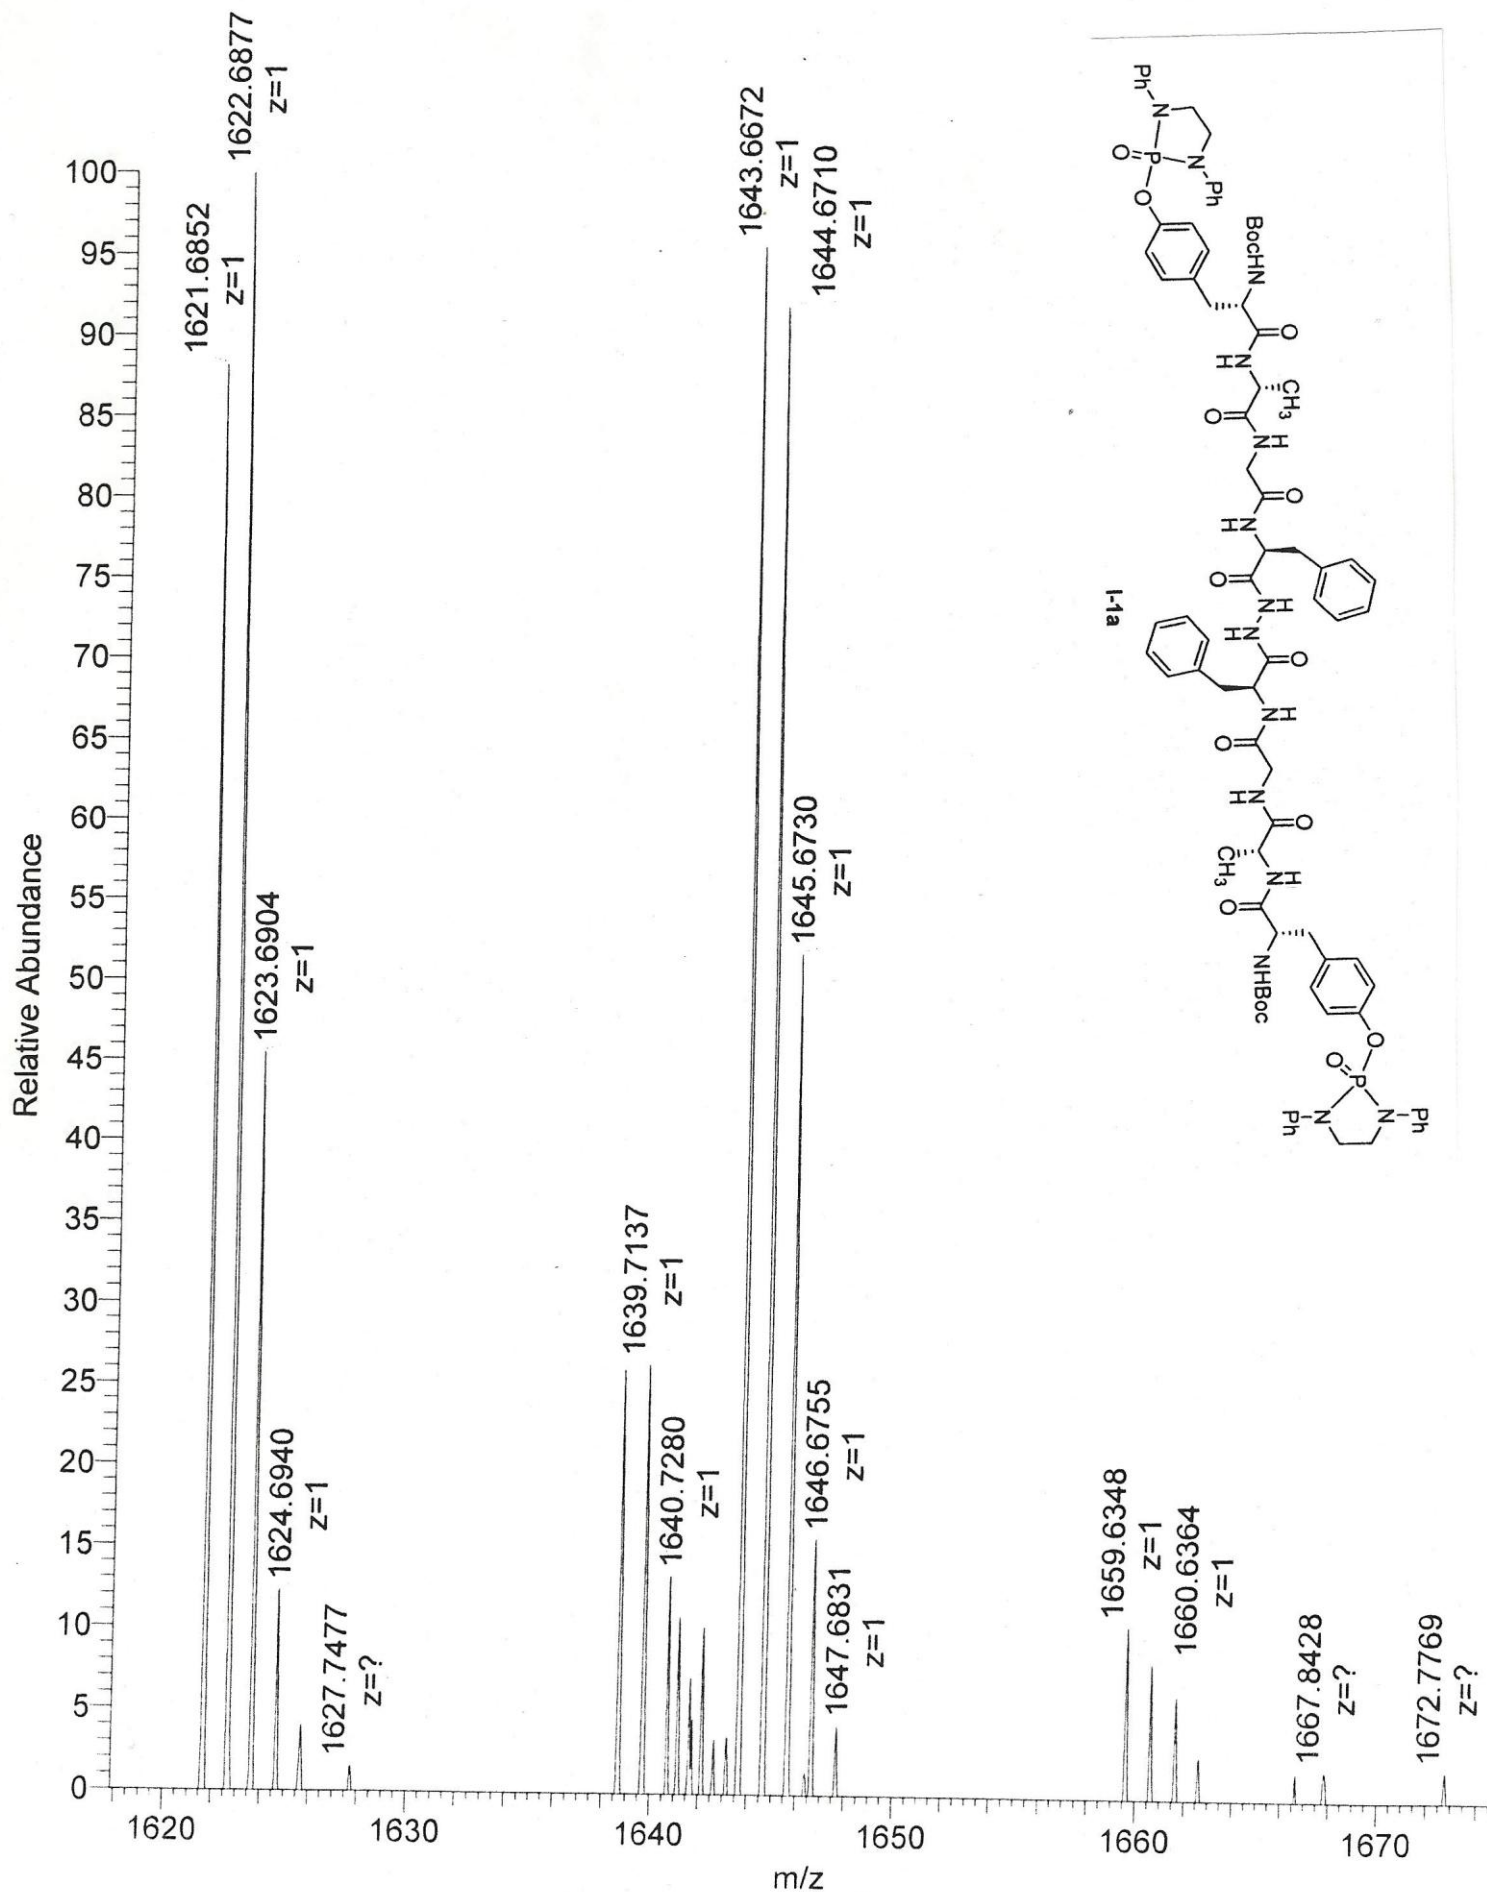

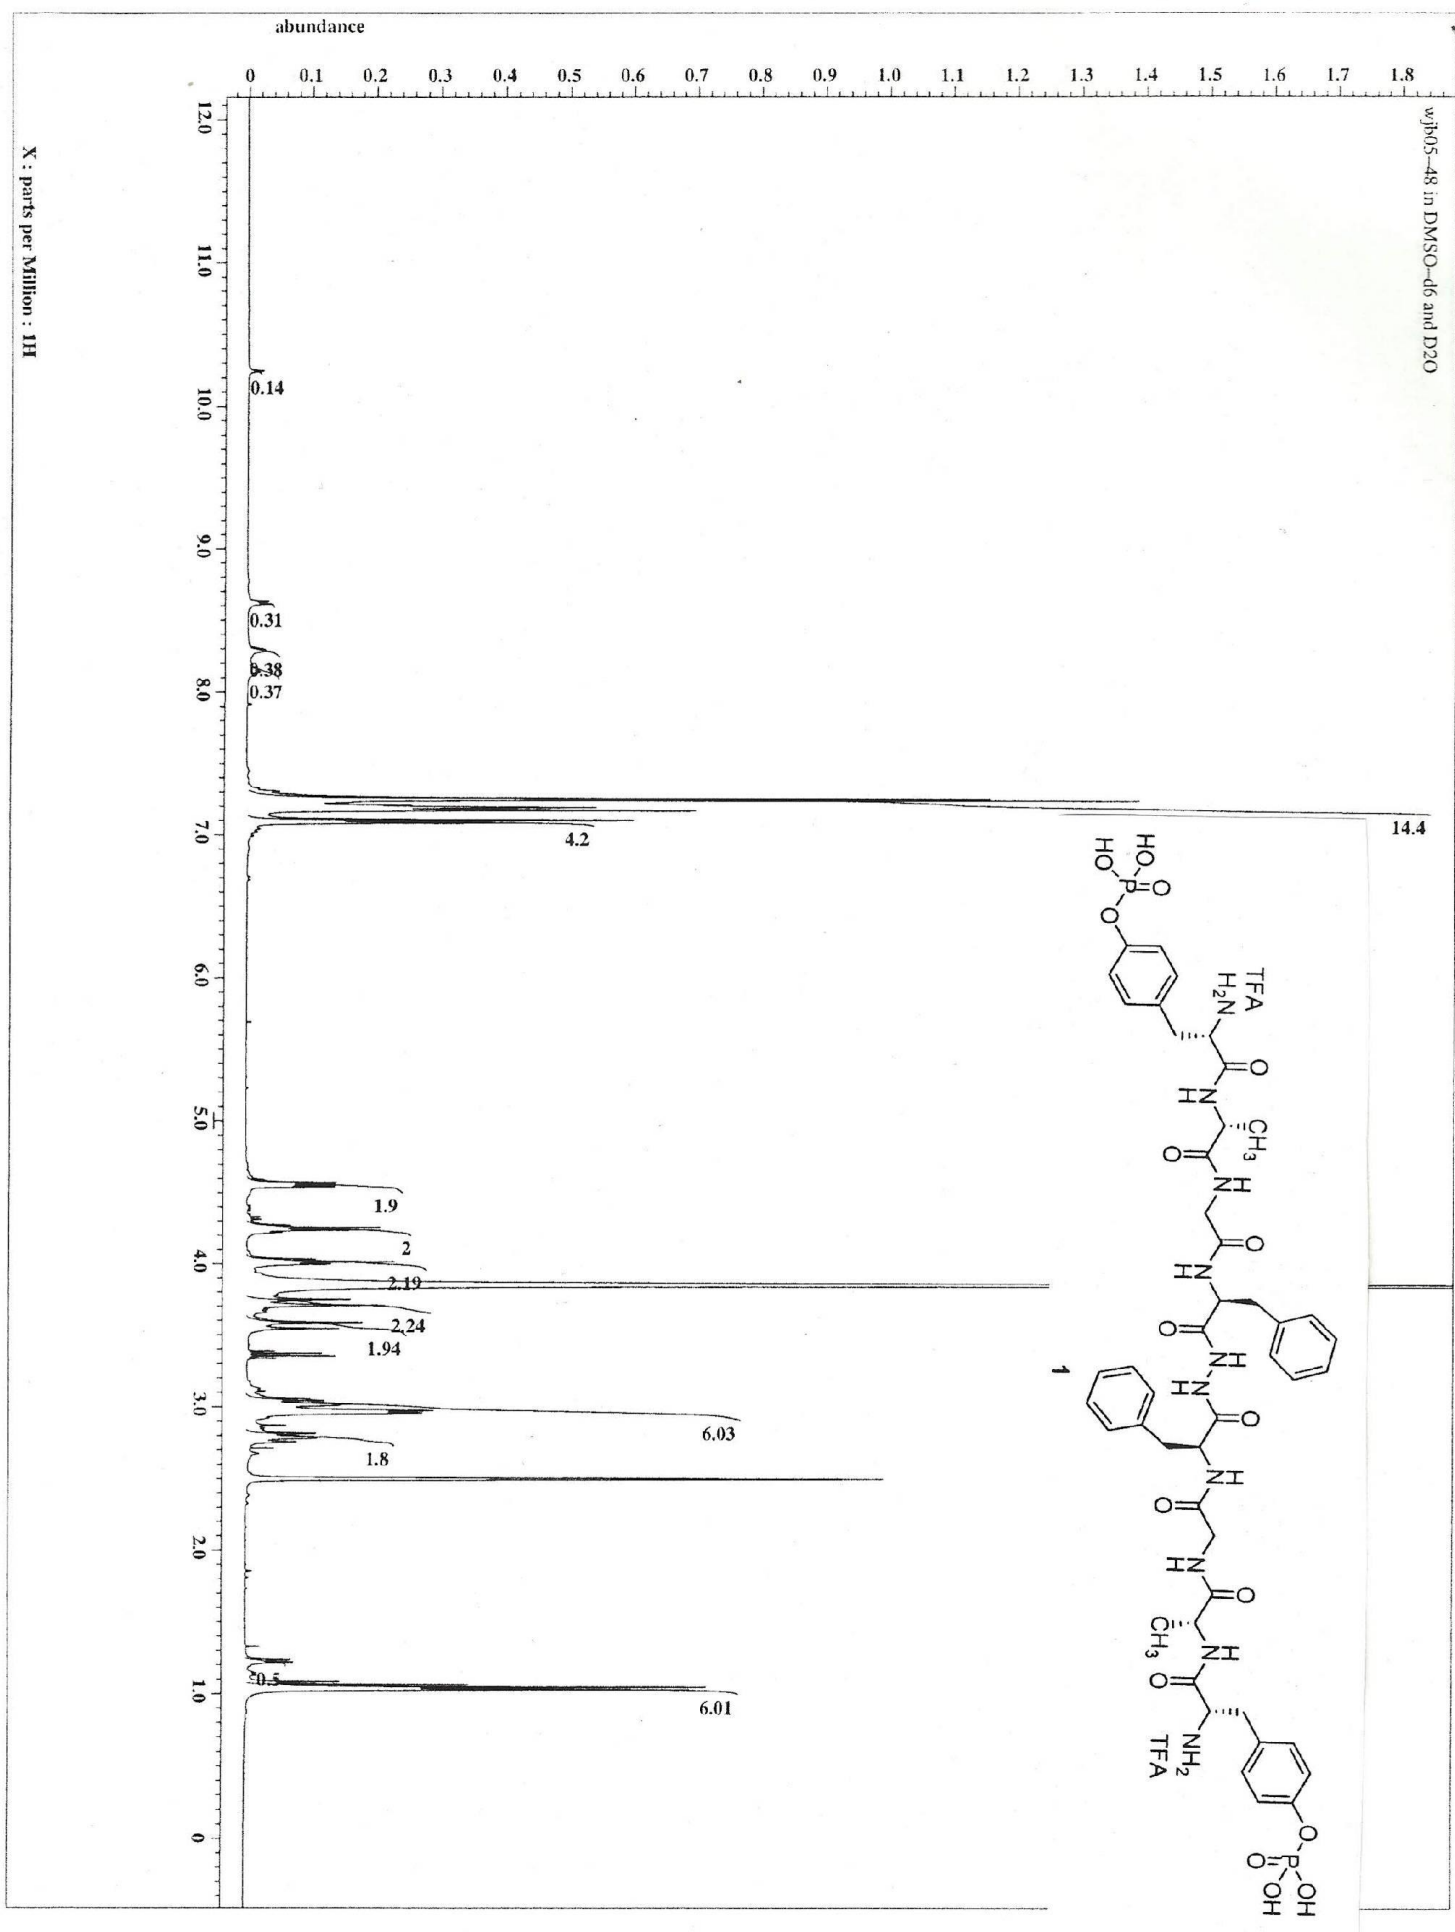

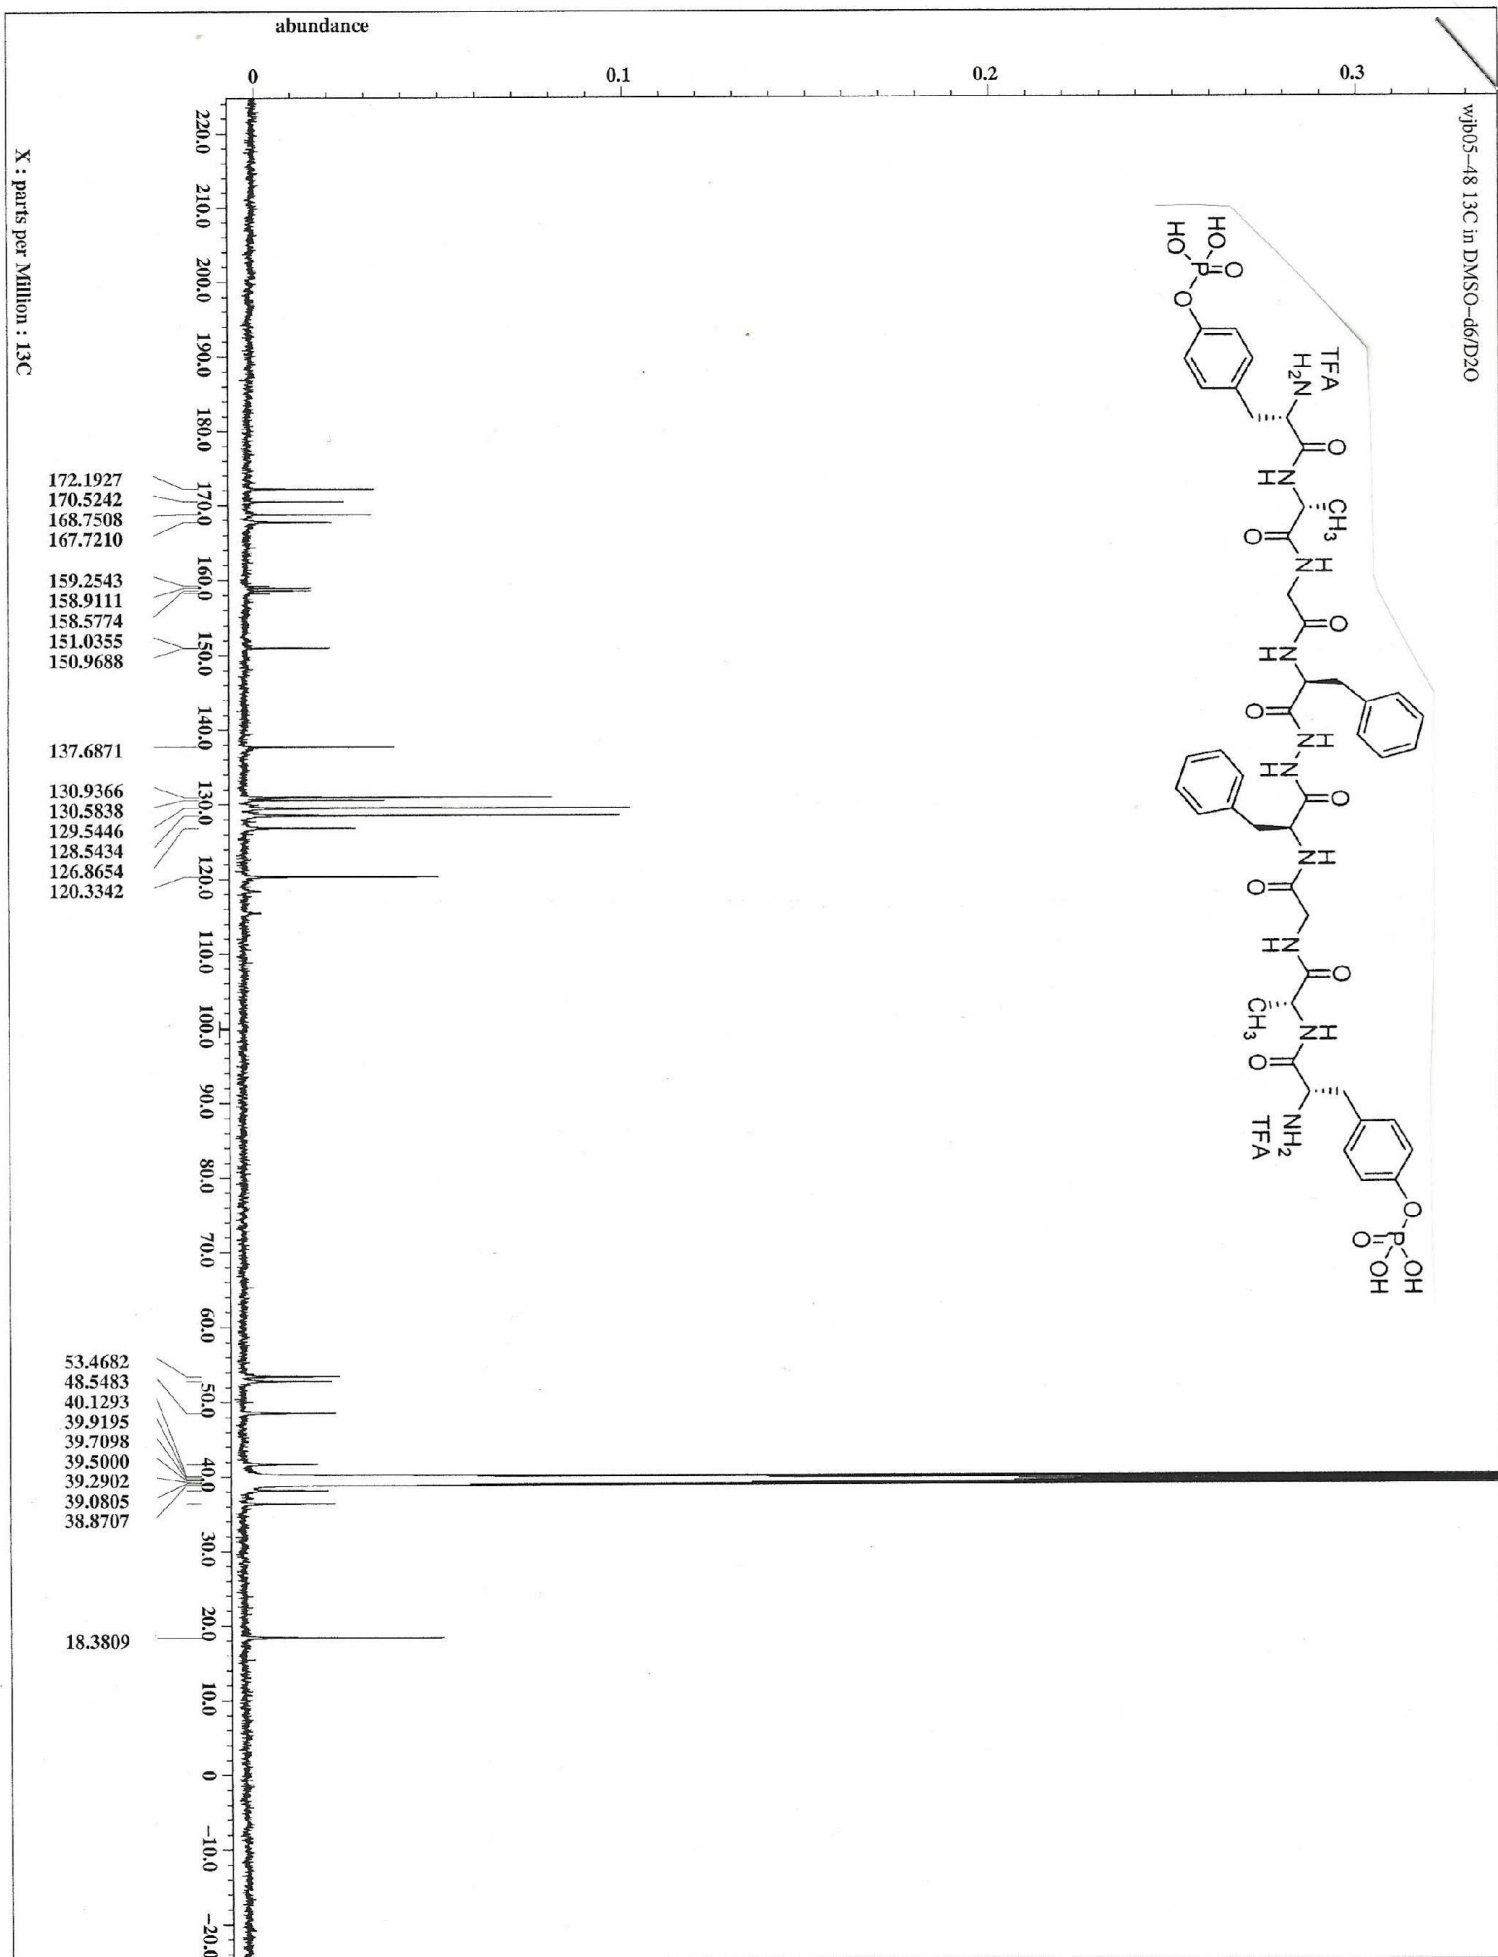

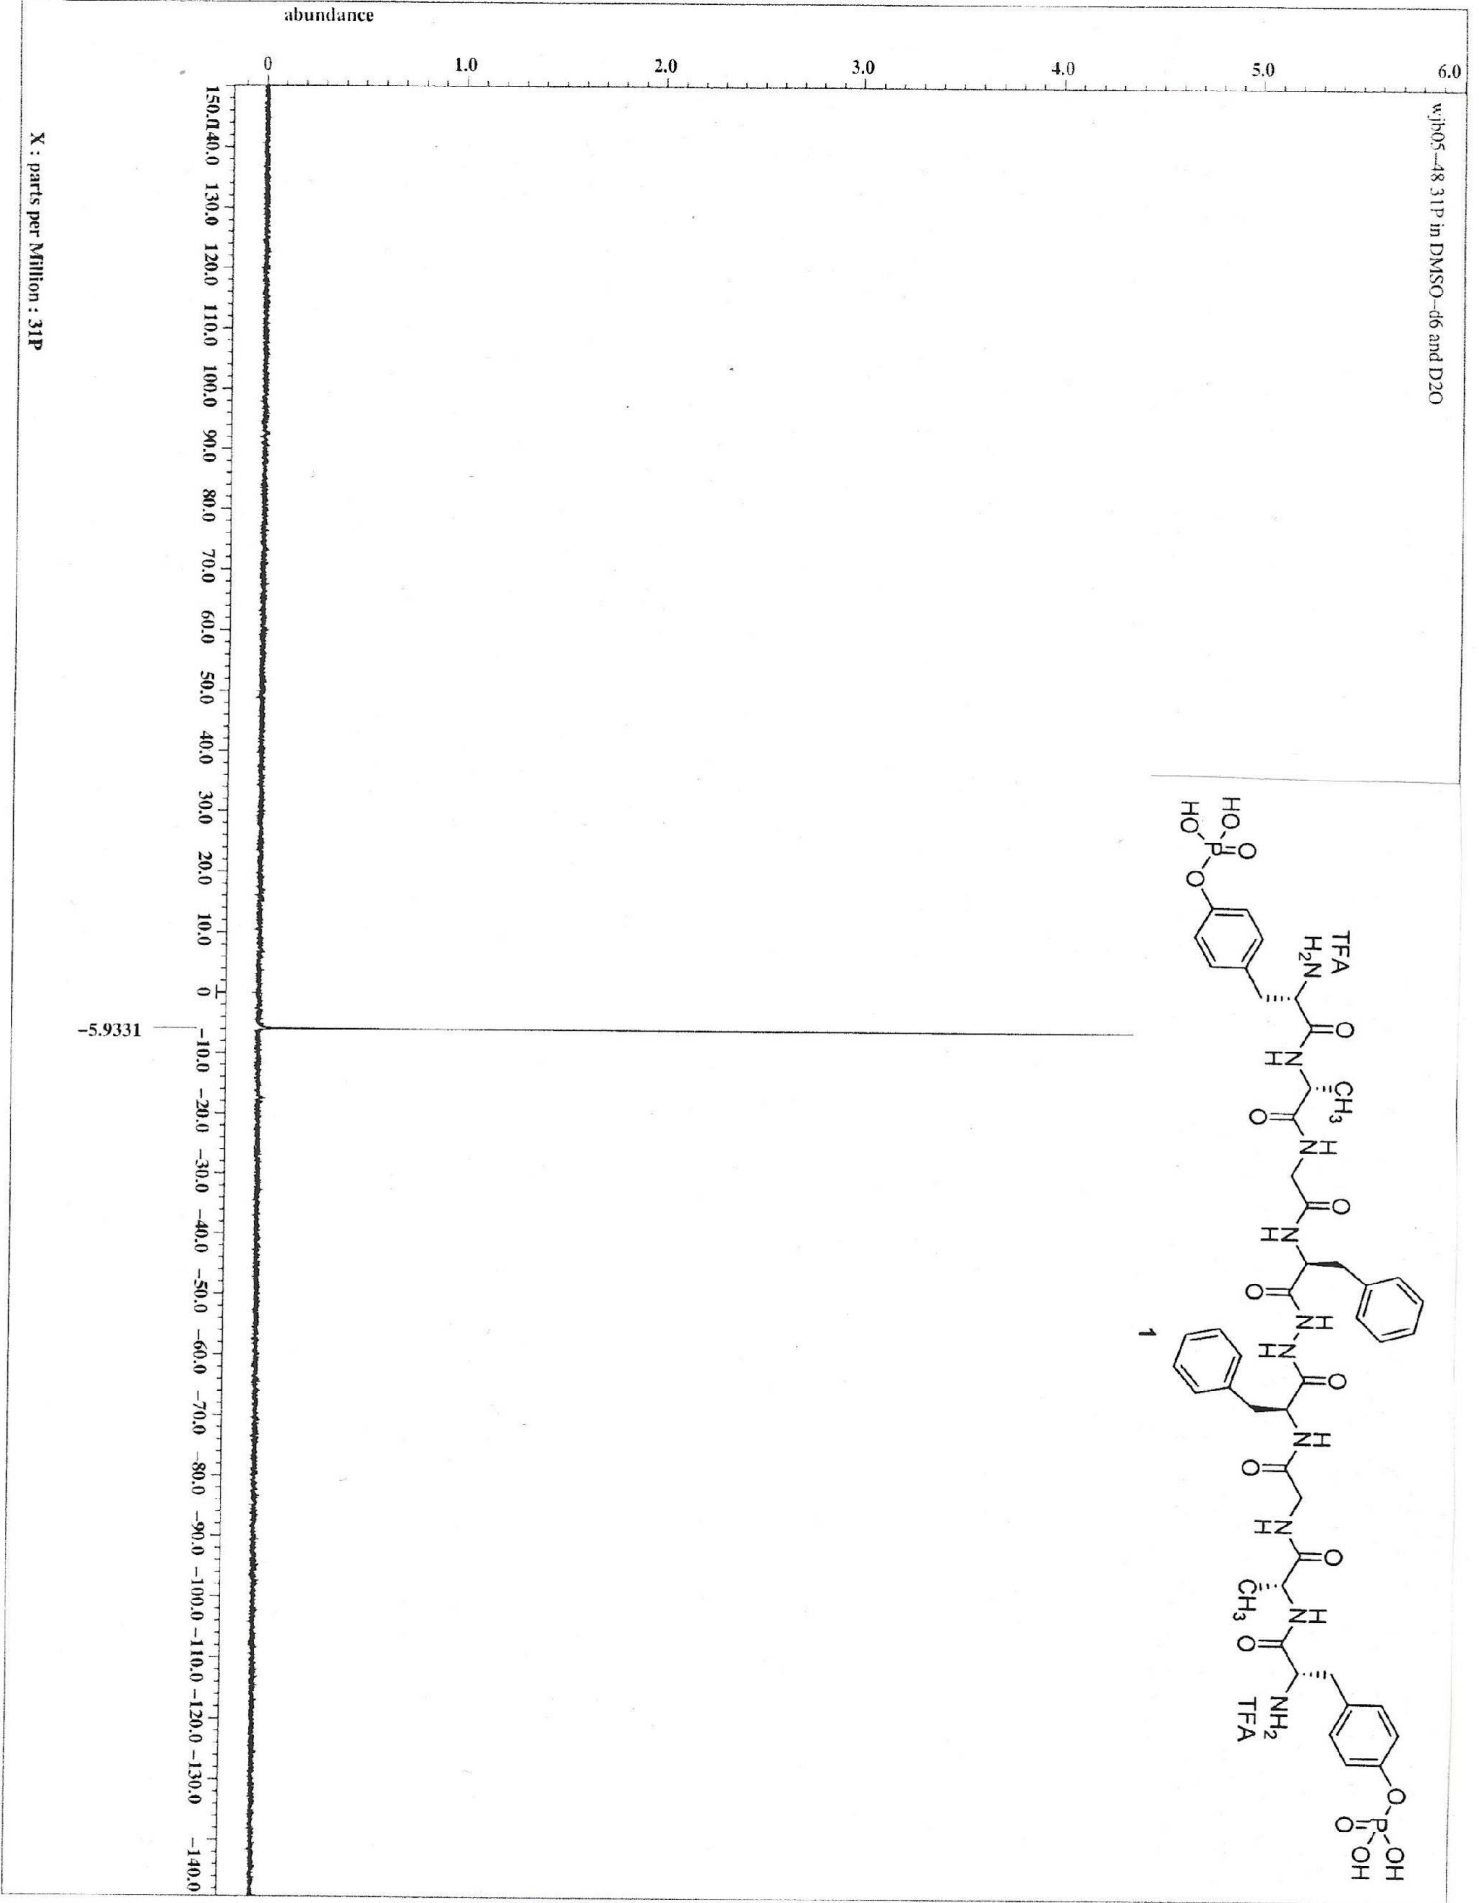



WJB-05-48\_12042012\_01 #130 RT: 1.95 AV: 1 NL: 5.86E5  
T: FTMS + p ESI Full ms [150.00-2000.00]

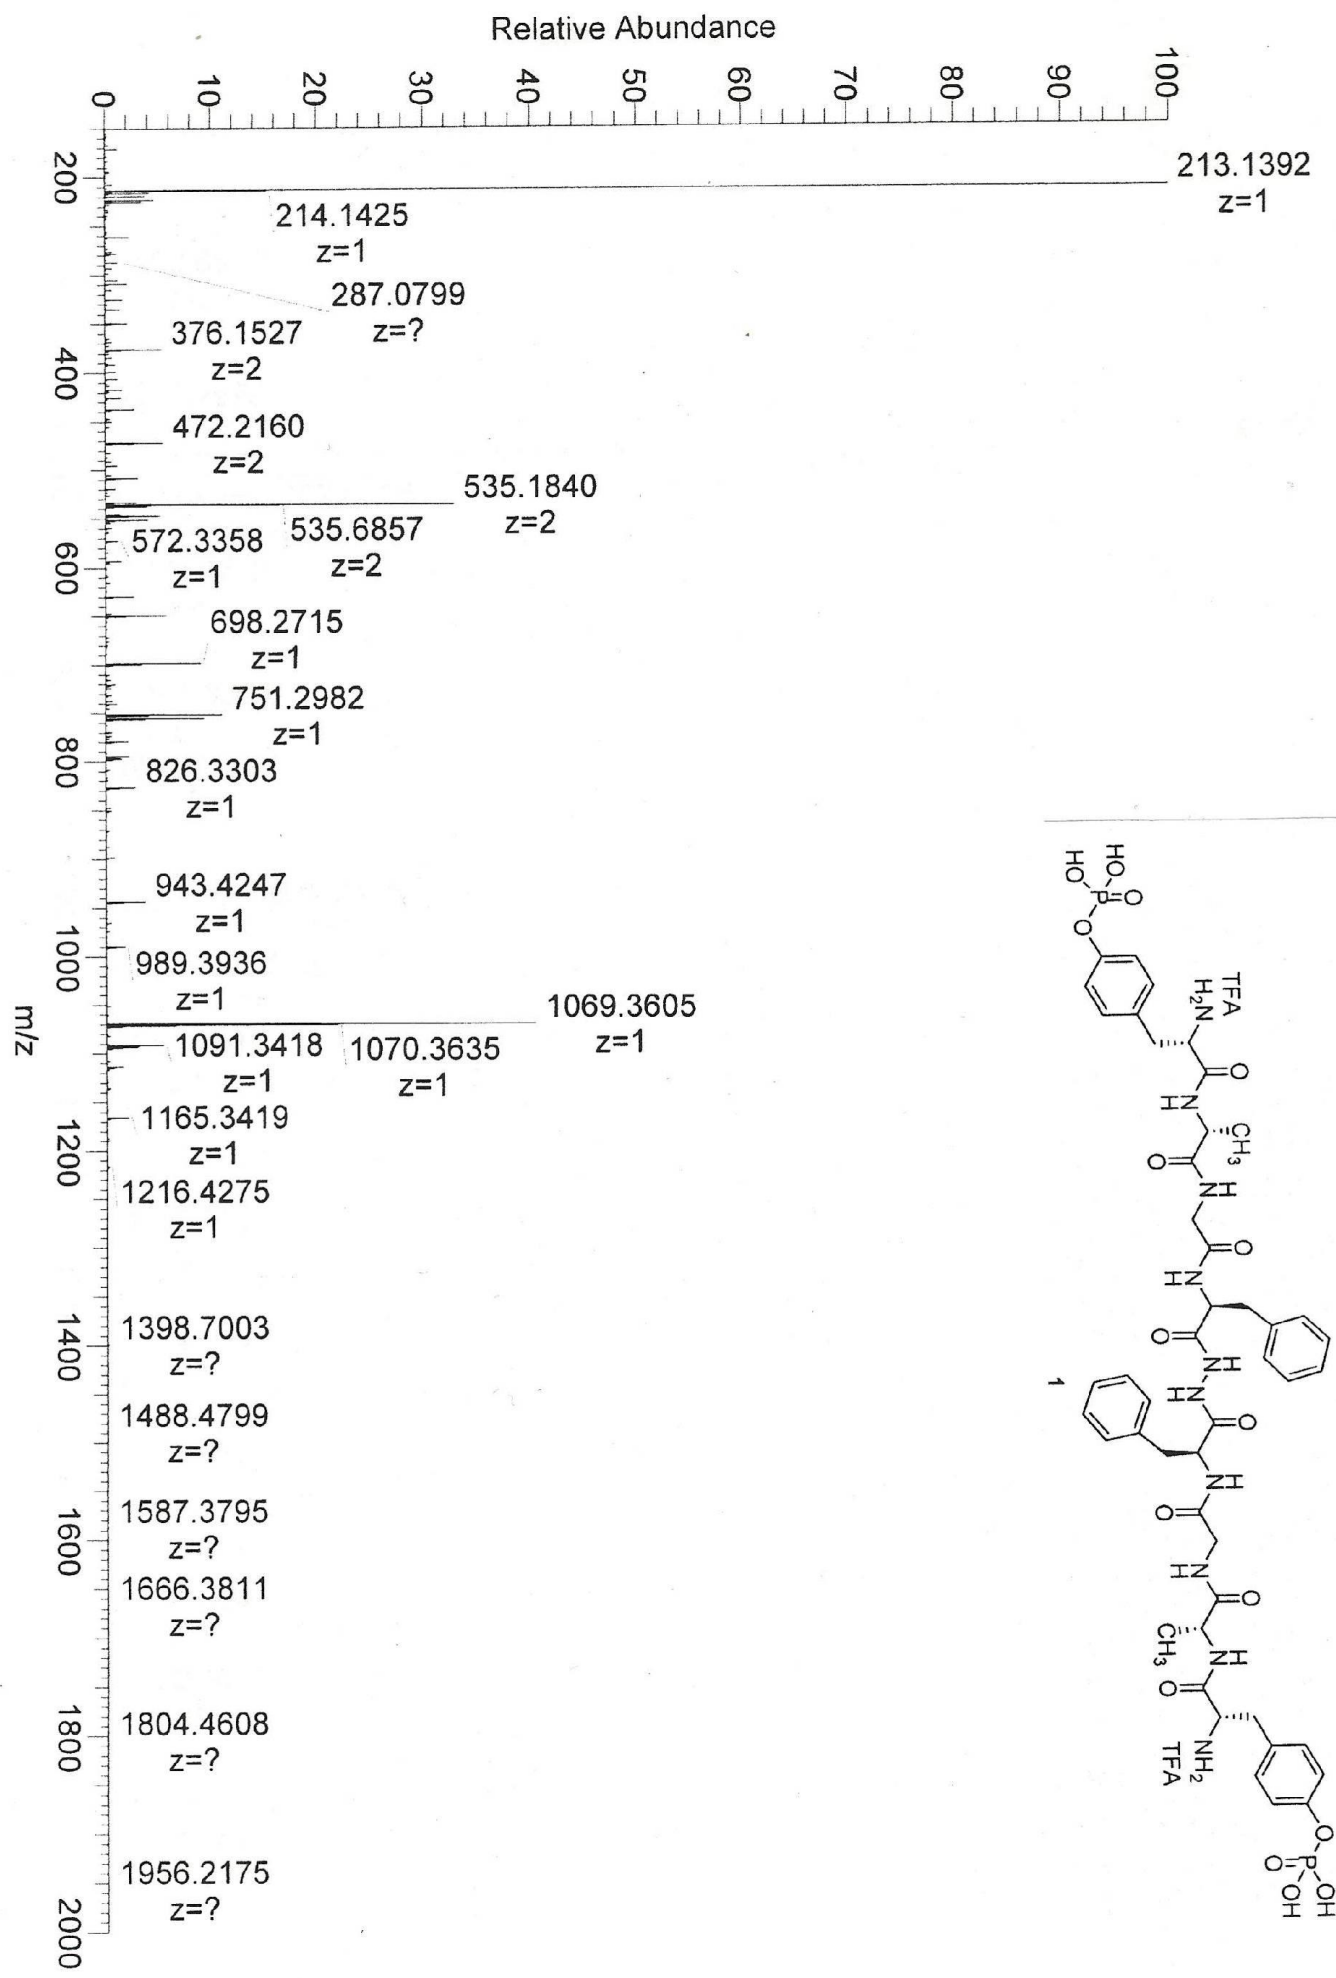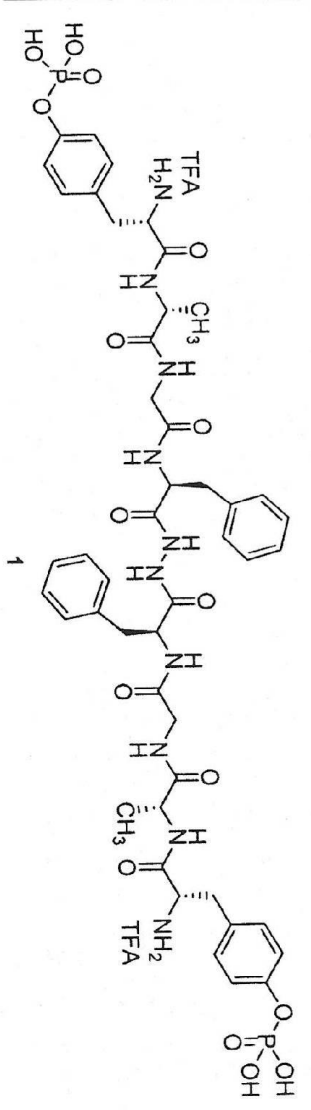

Supplement: c3cc48509a.pdf [file c3cc48509a.pdf]
